# Supplementary material for: Porifera of Greece: an updated checklist
Source: Biodivers Data J. 2016 Nov 1;(4):e7984. doi: 10.3897/BDJ.4.e7984 (PMC5136651; doi:10.3897/BDJ.4.e7984)
Supplement: Supplementary material 1 — Checklist of Porifera of Greece [file biodiversity_data_journal-4-e7984-s001.xls]

## Sheet: Taxa
Taxon_Local_ID	Kingdom	Subkingdom	Phylum	Subphylum	Superclass	Class	Subclass	Superorder	Order	Suborder	Infraorder	Superfamily	Family	Subfamily	Tribe	Subtribe	Genus	Subgenus	Species	Subspecies	Variety	Form	Authorship	Nomenclature	Feeds on	Symbiotic with	Parasite of	Host of	Native Status	Conservation Status	Distribution	Horizon	Notes
1	Animalia		Porifera			Calcarea			Baerida				Petrobionidae				Petrobiona		massiliana				Vacelet & Lévi, 1958
2	Animalia		Porifera			Calcarea			Clathrinida				Clathrinidae				Clathrina		blanca				(Miklucho-Maclay, 1868)
3	Animalia		Porifera			Calcarea			Clathrinida				Clathrinidae				Clathrina		clathrus				(Schmidt, 1864)
4	Animalia		Porifera			Calcarea			Clathrinida				Leucettidae				Leucetta		solida				(Schmidt, 1862)
5	Animalia		Porifera			Calcarea			Leucosolenida				Grantiidae				Leucandra		nausicaae				(Schuffner, 1877)
6	Animalia		Porifera			Calcarea			Leucosolenida				Sycettidae				Sycon		elegans				(Bowerbank, 1845)
7	Animalia		Porifera			Calcarea			Leucosolenida				Sycettidae				Sycon		faulkneri				Ilan, Gugel, Galil & Janussen, 2003
8	Animalia		Porifera			Calcarea			Leucosolenida				Sycettidae				Sycon		raphanus				Schmidt, 1862
9	Animalia		Porifera			Demospongiae			Agelasida				Agelasidae				Agelas		oroides				(Schmidt, 1864)
10	Animalia		Porifera			Demospongiae			Agelasida				Hymerhabdiidae				Hymerhabdia	#NAME?	intermedia				Sarà & Siribelli, 1960
11	Animalia		Porifera			Demospongiae			Agelasida				Hymerhabdiidae				Prosuberites		longispinus				Topsent, 1893
12	Animalia		Porifera			Demospongiae			Axinellida				Axinellidae				Axinella		cannabina				(Esper, 1794)
13	Animalia		Porifera			Demospongiae			Axinellida				Axinellidae				Axinella		damicornis				(Esper, 1794)
14	Animalia		Porifera			Demospongiae			Axinellida				Axinellidae				Axinella		polypoides				Schmidt, 1862
15	Animalia		Porifera			Demospongiae			Axinellida				Axinellidae				Axinella		verrucosa				(Esper, 1794)
16	Animalia		Porifera			Demospongiae			Axinellida				Heteroxyidae				Didiscus		stylifer				Tsurnamal, 1969
17	Animalia		Porifera			Demospongiae			Axinellida				Heteroxyidae				Myrmekioderma		spelaeum				(Pulitzer-Finali, 1983)
18	Animalia		Porifera			Demospongiae			Axinellida				Raspailiidae				Eurypon		cinctum				Sarà, 1960
19	Animalia		Porifera			Demospongiae			Axinellida				Raspailiidae				Eurypon		clavatum				(Bowerbank, 1866)
20	Animalia		Porifera			Demospongiae			Axinellida				Raspailiidae				Eurypon		coronula				(Bowerbank, 1874)
21	Animalia		Porifera			Demospongiae			Axinellida				Raspailiidae				Eurypon		major				Sarà & Siribelli, 1960
22	Animalia		Porifera			Demospongiae			Axinellida				Raspailiidae				Raspaciona		aculeata				(Johnston, 1842)
23	Animalia		Porifera			Demospongiae			Axinellida				Raspailiidae				Raspailia	Raspailia	viminalis				Schmidt, 1862
24	Animalia		Porifera			Demospongiae			Axinellida				Stelligeridae				Paratimea		pierantonii				(Sarà, 1958)
25	Animalia		Porifera			Demospongiae			Axinellida				Stelligeridae				Stelligera		stuposa				(Ellis & Solander, 1786)
26	Animalia		Porifera			Demospongiae			Bubarida				Dictyonellidae				Acanthella		acuta				Schmidt, 1862
27	Animalia		Porifera			Demospongiae			Bubarida				Dictyonellidae				Dictyonella		incisa				(Schmidt, 1880)
28	Animalia		Porifera			Demospongiae			Bubarida				Dictyonellidae				Dictyonella		marsilii				(Topsent, 1893)
29	Animalia		Porifera			Demospongiae			Bubarida				Dictyonellidae				Dictyonella		obtusa				(Schmidt, 1862)
30	Animalia		Porifera			Demospongiae			Bubarida				Dictyonellidae				Dictyonella		plicata				(Schmidt, 1880)
31	Animalia		Porifera			Demospongiae			Chondrillida				Chondrillidae				Chondrilla		nucula				Schmidt, 1862
32	Animalia		Porifera			Demospongiae			Chondrillida				Chondrillidae				Thymosiopsis		cuticulatus				Vacelet & Perez, 1998
33	Animalia		Porifera			Demospongiae			Chondrillida				Halisarcidae				Halisarca		dujardinii				Johnston, 1842
34	Animalia		Porifera			Demospongiae			Chondrosiida				Chondrosiidae				Chondrosia		reniformis				Nardo, 1847
35	Animalia		Porifera			Demospongiae			Clionaida				Clionaidae				Cliona		celata				Grant, 1826
36	Animalia		Porifera			Demospongiae			Clionaida				Clionaidae				Cliona		parenzani				Corriero & Scalera-Liaci, 1997
37	Animalia		Porifera			Demospongiae			Clionaida				Clionaidae				Cliona		rhodensis				Rützler & Bromley, 1981
38	Animalia		Porifera			Demospongiae			Clionaida				Clionaidae				Cliona		schmidtii				(Ridley, 1881)
39	Animalia		Porifera			Demospongiae			Clionaida				Clionaidae				Cliona		thoosina				Topsent, 1888
40	Animalia		Porifera			Demospongiae			Clionaida				Clionaidae				Cliona		viridis				(Schmidt, 1862)
41	Animalia		Porifera			Demospongiae			Clionaida				Clionaidae				Spiroxya		heteroclita				Topsent, 1896
42	Animalia		Porifera			Demospongiae			Clionaida				Spirastrellidae				Diplastrella		bistellata				(Schmidt, 1862)
43	Animalia		Porifera			Demospongiae			Clionaida				Spirastrellidae				Diplastrella		ornata				Rützler & Sarà, 1962
44	Animalia		Porifera			Demospongiae			Clionaida				Spirastrellidae				Spirastrella		cunctatrix				Schmidt, 1868
45	Animalia		Porifera			Demospongiae			Dendroceratida				Darwinellidae				Aplysilla		rosea				(Barrois, 1876)
46	Animalia		Porifera			Demospongiae			Dendroceratida				Darwinellidae				Dendrilla		acantha				Vacelet, 1958
47	Animalia		Porifera			Demospongiae			Dendroceratida				Dictyodendrillidae				Spongionella		pulchella				(Sowerby, 1804)
48	Animalia		Porifera			Demospongiae			Desmacellida				Desmacellidae				Desmacella		annexa				Schmidt, 1870
49	Animalia		Porifera			Demospongiae			Desmacellida				Desmacellidae				Desmacella		inornata				(Bowerbank, 1866)
50	Animalia		Porifera			Demospongiae			Dictyoceratida				Dysideidae				Dysidea		avara				(Schmidt, 1862)
51	Animalia		Porifera			Demospongiae			Dictyoceratida				Dysideidae				Dysidea		fragilis				(Montagu, 1814)
52	Animalia		Porifera			Demospongiae			Dictyoceratida				Dysideidae				Dysidea		incrustans				(Schmidt, 1862)
53	Animalia		Porifera			Demospongiae			Dictyoceratida				Dysideidae				Dysidea		tupha				(Martens, 1824)
54	Animalia		Porifera			Demospongiae			Dictyoceratida				Dysideidae				Pleraplysilla		spinifera				(Schulze, 1879)
55	Animalia		Porifera			Demospongiae			Dictyoceratida				Irciniidae				Ircinia		dendroides				(Schmidt, 1862)
56	Animalia		Porifera			Demospongiae			Dictyoceratida				Irciniidae				Ircinia		oros				(Schmidt, 1864)
57	Animalia		Porifera			Demospongiae			Dictyoceratida				Irciniidae				Ircinia		paucifilamentosa				Vacelet, 1961
58	Animalia		Porifera			Demospongiae			Dictyoceratida				Irciniidae				Ircinia		retidermata				Pulitzer-Finali & Pronzato, 1981
59	Animalia		Porifera			Demospongiae			Dictyoceratida				Irciniidae				Ircinia		variabilis				(Schmidt, 1862)
60	Animalia		Porifera			Demospongiae			Dictyoceratida				Irciniidae				Ircinia		vestibulata				(Szymanski, 1904)
61	Animalia		Porifera			Demospongiae			Dictyoceratida				Irciniidae				Sarcotragus		foetidus				Schmidt, 1862
62	Animalia		Porifera			Demospongiae			Dictyoceratida				Irciniidae				Sarcotragus		pipetta				(Schmidt, 1868)
63	Animalia		Porifera			Demospongiae			Dictyoceratida				Irciniidae				Sarcotragus		spinosulus				Schmidt, 1862
64	Animalia		Porifera			Demospongiae			Dictyoceratida				Spongiidae				Coscinoderma		sporadense				Voultsiadou-Koukoura, van Soest & Koukouras, 1991
65	Animalia		Porifera			Demospongiae			Dictyoceratida				Spongiidae				Hippospongia		communis				(Lamarck, 1814)
66	Animalia		Porifera			Demospongiae			Dictyoceratida				Spongiidae				Spongia	Spongia	lamella				(Schulze, 1879)
67	Animalia		Porifera			Demospongiae			Dictyoceratida				Spongiidae				Spongia	Spongia	nitens				(Schmidt, 1862)
68	Animalia		Porifera			Demospongiae			Dictyoceratida				Spongiidae				Spongia	Spongia	officinalis				Linnaeus, 1759
69	Animalia		Porifera			Demospongiae			Dictyoceratida				Spongiidae				Spongia	Spongia	virgultosa				(Schmidt, 1868)
70	Animalia		Porifera			Demospongiae			Dictyoceratida				Spongiidae				Spongia	Spongia	zimocca				Schmidt, 1862
71	Animalia		Porifera			Demospongiae			Dictyoceratida				Thorectidae				Cacospongia		mollior				Schmidt, 1862
72	Animalia		Porifera			Demospongiae			Dictyoceratida				Thorectidae				Fasciospongia		cavernosa				(Schmidt, 1862)
73	Animalia		Porifera			Demospongiae			Dictyoceratida				Thorectidae				Hyrtios		collectrix				(Schulze, 1880)
74	Animalia		Porifera			Demospongiae			Dictyoceratida				Thorectidae				Scalarispongia		scalaris				(Schmidt, 1862)
75	Animalia		Porifera			Demospongiae			Haplosclerida				Callyspongiidae				Callyspongia		septimaniensis				Griessinger, 1971
76	Animalia		Porifera			Demospongiae			Haplosclerida				Callyspongiidae				Siphonochalina		expansa				Sarà, 1960
77	Animalia		Porifera			Demospongiae			Haplosclerida				Chalinidae				Dendroxea		lenis				(Topsent, 1892)
78	Animalia		Porifera			Demospongiae			Haplosclerida				Chalinidae				Haliclona	Gellius	dubia				(Babic, 1922)
79	Animalia		Porifera			Demospongiae			Haplosclerida				Chalinidae				Haliclona	Gellius	fibulata				(Schmidt, 1862)
80	Animalia		Porifera			Demospongiae			Haplosclerida				Chalinidae				Haliclona	Gellius	microsigma				(Babic, 1922)
81	Animalia		Porifera			Demospongiae			Haplosclerida				Chalinidae				Haliclona	Halichoclona	fulva				(Topsent, 1893)
82	Animalia		Porifera			Demospongiae			Haplosclerida				Chalinidae				Haliclona	Halichoclona	perlucida				(Griessinger, 1971)
83	Animalia		Porifera			Demospongiae			Haplosclerida				Chalinidae				Haliclona	Haliclona	simulans				(Johnston, 1842)
84	Animalia		Porifera			Demospongiae			Haplosclerida				Chalinidae				Haliclona	Reniera	aquaeductus				(Schmidt, 1862)
85	Animalia		Porifera			Demospongiae			Haplosclerida				Chalinidae				Haliclona	Reniera	cinerea				(Grant, 1826)
86	Animalia		Porifera			Demospongiae			Haplosclerida				Chalinidae				Haliclona	Reniera	cratera				(Schmidt, 1862)
87	Animalia		Porifera			Demospongiae			Haplosclerida				Chalinidae				Haliclona	Reniera	mediterranea				Griessinger, 1971
88	Animalia		Porifera			Demospongiae			Haplosclerida				Chalinidae				Haliclona	Reniera	subtilis				Griessinger, 1971
89	Animalia		Porifera			Demospongiae			Haplosclerida				Chalinidae				Haliclona	Rhizoniera	rhizophora				(Vacelet, 1969)
90	Animalia		Porifera			Demospongiae			Haplosclerida				Chalinidae				Haliclona	Rhizoniera	sarai				(Pulitzer-Finali, 1969)
91	Animalia		Porifera			Demospongiae			Haplosclerida				Chalinidae				Haliclona	Soestella	implexa				(Schmidt, 1868)
92	Animalia		Porifera			Demospongiae			Haplosclerida				Chalinidae				Haliclona	Soestella	mamillata				(Griessinger, 1971)
93	Animalia		Porifera			Demospongiae			Haplosclerida				Chalinidae				Haliclona	Soestella	mucosa				(Griessinger, 1971)
94	Animalia		Porifera			Demospongiae			Haplosclerida				Niphatidae				Pachychalina		rustica				Schmidt, 1868
95	Animalia		Porifera			Demospongiae			Haplosclerida				Petrosiidae				Petrosia	Petrosia	clavata				(Esper, 1794)
96	Animalia		Porifera			Demospongiae			Haplosclerida				Petrosiidae				Petrosia	Petrosia	ficiformis				(Poiret, 1789)
97	Animalia		Porifera			Demospongiae			Haplosclerida				Petrosiidae				Petrosia		pulitzeri				Pansini, 1996
98	Animalia		Porifera			Demospongiae			Haplosclerida				Phloeodictyidae				Calyx		nicaeensis				(Risso, 1826)
99	Animalia		Porifera			Demospongiae			Merliida				Hamacanthidae				Hamacantha	Vomerula	falcula				(Bowerbank, 1874)
100	Animalia		Porifera			Demospongiae			Merliida				Merliidae				Merlia		normani				Kirkpatrick, 1908
101	Animalia		Porifera			Demospongiae			Poecilosclerida				Coelosphaeridae				Forcepia	Leptolabis	luciensis				(Topsent, 1888)
102	Animalia		Porifera			Demospongiae			Poecilosclerida				Coelosphaeridae				Lissodendoryx	Lissodendoryx	isodictyalis				(Carter, 1882)
103	Animalia		Porifera			Demospongiae			Poecilosclerida				Crambeidae				Crambe		crambe				(Schmidt, 1862)
104	Animalia		Porifera			Demospongiae			Poecilosclerida				Crellidae				Crella	Pytheas	fusifera				Sarà, 1969
105	Animalia		Porifera			Demospongiae			Poecilosclerida				Crellidae				Crella	Pytheas	sigmata				Topsent, 1925
106	Animalia		Porifera			Demospongiae			Poecilosclerida				Esperiopsidae				Ulosa		stuposa				(Esper, 1794)
107	Animalia		Porifera			Demospongiae			Poecilosclerida				Esperiopsidae				Ulosa		tenellula				Pulitzer-Finali, 1983
108	Animalia		Porifera			Demospongiae			Poecilosclerida				Hymedesmiidae				Hemimycale		columella				(Bowerbank, 1874)
109	Animalia		Porifera			Demospongiae			Poecilosclerida				Hymedesmiidae				Hymedesmia	Hymedesmia	pansa				Bowerbank, 1882
110	Animalia		Porifera			Demospongiae			Poecilosclerida				Hymedesmiidae				Hymedesmia	Hymedesmia	peachii				Bowerbank, 1882
111	Animalia		Porifera			Demospongiae			Poecilosclerida				Hymedesmiidae				Hymedesmia	Hymedesmia	simillima				Lundbeck, 1910
112	Animalia		Porifera			Demospongiae			Poecilosclerida				Hymedesmiidae				Hymedesmia	Hymedesmia	versicolor				(Topsent, 1893)
113	Animalia		Porifera			Demospongiae			Poecilosclerida				Hymedesmiidae				Phorbas		fictitius				(Bowerbank, 1866)
114	Animalia		Porifera			Demospongiae			Poecilosclerida				Hymedesmiidae				Phorbas		posidoni				Voultsiadou-Koukoura & van Soest, 1991
115	Animalia		Porifera			Demospongiae			Poecilosclerida				Hymedesmiidae				Phorbas		tenacior				(Topsent, 1925)
116	Animalia		Porifera			Demospongiae			Poecilosclerida				Hymedesmiidae				Phorbas		topsenti				Vacelet & Perez, 2008
117	Animalia		Porifera			Demospongiae			Poecilosclerida				Microcionidae				Antho	Antho	involvens				(Schmidt, 1864)
118	Animalia		Porifera			Demospongiae			Poecilosclerida				Microcionidae				Clathria	Clathria	toxistricta				Topsent, 1925
119	Animalia		Porifera			Demospongiae			Poecilosclerida				Microcionidae				Clathria	Clathria	toxistyla				(Sarà, 1959)
120	Animalia		Porifera			Demospongiae			Poecilosclerida				Microcionidae				Clathria	Clathria	toxivaria				(Sarà, 1959)
121	Animalia		Porifera			Demospongiae			Poecilosclerida				Microcionidae				Clathria	Microciona	cleistochela				(Topsent, 1925)
122	Animalia		Porifera			Demospongiae			Poecilosclerida				Microcionidae				Clathria	Microciona	gradalis				Topsent, 1925
123	Animalia		Porifera			Demospongiae			Poecilosclerida				Microcionidae				Clathria	Thalysias	jolicoeuri				(Topsent, 1892)
124	Animalia		Porifera			Demospongiae			Poecilosclerida				Microcionidae				Echinoclathria		translata				(Pulitzer-Finali, 1978)
125	Animalia		Porifera			Demospongiae			Poecilosclerida				Mycalidae				Mycale	Aegogropila	contarenii				(Lieberkühn, 1859)
126	Animalia		Porifera			Demospongiae			Poecilosclerida				Mycalidae				Mycale	Aegogropila	retifera				Topsent, 1924
127	Animalia		Porifera			Demospongiae			Poecilosclerida				Mycalidae				Mycale	Aegogropila	rotalis				(Bowerbank, 1874)
128	Animalia		Porifera			Demospongiae			Poecilosclerida				Mycalidae				Mycale	Aegogropila	syrinx				(Schmidt, 1862)
129	Animalia		Porifera			Demospongiae			Poecilosclerida				Mycalidae				Mycale	Aegogropila	tunicata				(Schmidt, 1862)
130	Animalia		Porifera			Demospongiae			Poecilosclerida				Mycalidae				Mycale	Carmia	macilenta				(Bowerbank, 1866)
131	Animalia		Porifera			Demospongiae			Poecilosclerida				Mycalidae				Mycale	Mycale	lingua				(Bowerbank, 1866)
132	Animalia		Porifera			Demospongiae			Poecilosclerida				Mycalidae				Mycale	Mycale	massa				(Schmidt, 1862)
133	Animalia		Porifera			Demospongiae			Poecilosclerida				Mycalidae				Mycale	Paresperella	serrulata				Sarà & Siribelli, 1960
134	Animalia		Porifera			Demospongiae			Poecilosclerida				Myxillidae				Myxilla	Myxilla	rosacea				(Lieberkühn, 1859)
135	Animalia		Porifera			Demospongiae			Poecilosclerida				Tedaniidae				Tedania	Tedania	anhelans				(Vio in Olivi, 1792)
136	Animalia		Porifera			Demospongiae			Polymastiida				Polymastiidae				Tentorium		levantinum				Ilan, Gugel, Galil & Janussen, 2003
137	Animalia		Porifera			Demospongiae			Polymastiida				Polymastiidae				Weberella		verrucosa				Vacelet, 1960
138	Animalia		Porifera			Demospongiae			Scopalinida				Scopalinidae				Scopalina		lophyropoda				Schmidt, 1862
139	Animalia		Porifera			Demospongiae			Spongillida				Spongillidae				Ephydatia		fluviatilis				(Linnaeus, 1759)
140	Animalia		Porifera			Demospongiae			Spongillida				Spongillidae				Eunapius		carteri				(Bowerbank, 1863)
141	Animalia		Porifera			Demospongiae			Suberitida				Halichondriidae				Axinyssa		aurantiaca				(Schmidt, 1864)
142	Animalia		Porifera			Demospongiae			Suberitida				Halichondriidae				Axinyssa		michaelis				Kefalas & Castritsi-Catharios, 2007
143	Animalia		Porifera			Demospongiae			Suberitida				Halichondriidae				Halichondria	Halichondria	contorta				(Sarà, 1961)
144	Animalia		Porifera			Demospongiae			Suberitida				Halichondriidae				Halichondria	Halichondria	panicea				(Pallas, 1766)
145	Animalia		Porifera			Demospongiae			Suberitida				Halichondriidae				Hymeniacidon		perlevis				(Montagu, 1814)
146	Animalia		Porifera			Demospongiae			Suberitida				Halichondriidae				Laminospongia		subtilis				Pulitzer-Finali, 1983
147	Animalia		Porifera			Demospongiae			Suberitida				Halichondriidae				Spongosorites		flavens				Pulitzer-Finali, 1983
148	Animalia		Porifera			Demospongiae			Suberitida				Halichondriidae				Spongosorites		intricatus				(Topsent, 1892)
149	Animalia		Porifera			Demospongiae			Suberitida				Halichondriidae				Topsentia		vaceleti				Kefalas & Castritsi-Catharios, 2012
150	Animalia		Porifera			Demospongiae			Suberitida				Stylocordylidae				Stylocordyla		pellita				(Topsent, 1904)
151	Animalia		Porifera			Demospongiae			Suberitida				Suberitidae				Aaptos		aaptos				(Schmidt, 1864)
152	Animalia		Porifera			Demospongiae			Suberitida				Suberitidae				Aaptos		papillata				(Keller, 1880)
153	Animalia		Porifera			Demospongiae			Suberitida				Suberitidae				Protosuberites		denhartogi				van Soest & de Kluijver, 2003
154	Animalia		Porifera			Demospongiae			Suberitida				Suberitidae				Protosuberites		ectyoninus				(Topsent, 1900)
155	Animalia		Porifera			Demospongiae			Suberitida				Suberitidae				Protosuberites		rugosus				(Topsent, 1893)
156	Animalia		Porifera			Demospongiae			Suberitida				Suberitidae				Pseudosuberites		sulphureus				(Bowerbank, 1866)
157	Animalia		Porifera			Demospongiae			Suberitida				Suberitidae				Rhizaxinella		pyrifera				(Delle Chiaje, 1828)
158	Animalia		Porifera			Demospongiae			Suberitida				Suberitidae				Rhizaxinella		shikmonae				Ilan, Gugel, Galil & Janussen, 2003
159	Animalia		Porifera			Demospongiae			Suberitida				Suberitidae				Suberites		carnosus				(Johnston, 1842)
160	Animalia		Porifera			Demospongiae			Suberitida				Suberitidae				Suberites		domuncula				(Olivi, 1792)
161	Animalia		Porifera			Demospongiae			Suberitida				Suberitidae				Suberites		ficus				(Johnston, 1842)
162	Animalia		Porifera			Demospongiae			Suberitida				Suberitidae				Suberites		massa				Nardo, 1847
163	Animalia		Porifera			Demospongiae			Suberitida				Suberitidae				Suberites		syringella				(Schmidt, 1868)
164	Animalia		Porifera			Demospongiae			Suberitida				Suberitidae				Terpios		gelatinosa				(Bowerbank, 1866)
165	Animalia		Porifera			Demospongiae			Tethyida				Hemiasterellidae				Hemiasterella		aristoteliana				Voultsiadou-Koukoura & van Soest, 1991
166	Animalia		Porifera			Demospongiae			Tethyida				Tethyidae				Tethya		aurantium				(Pallas, 1766)
167	Animalia		Porifera			Demospongiae			Tethyida				Tethyidae				Tethya		citrina				Sarà & Melone, 1965
168	Animalia		Porifera			Demospongiae			Tethyida				Timeidae				Timea		chondrilloides				(Topsent, 1904)
169	Animalia		Porifera			Demospongiae			Tethyida				Timeidae				Timea		geministellata				Pulitzer-Finali, 1978
170	Animalia		Porifera			Demospongiae			Tethyida				Timeidae				Timea		stellata				(Bowerbank, 1866)
171	Animalia		Porifera			Demospongiae			Tethyida				Timeidae				Timea		stellifasciata				Sarà & Siribelli, 1960
172	Animalia		Porifera			Demospongiae			Tethyida				Timeidae				Timea		unistellata				(Topsent, 1892)
173	Animalia		Porifera			Demospongiae			Tetractinellida				Ancorinidae				Dercitus	Stoeba	plicatus				(Schmidt, 1868)
174	Animalia		Porifera			Demospongiae			Tetractinellida				Ancorinidae				Jaspis		johnstonii				(Schmidt, 1862)
175	Animalia		Porifera			Demospongiae			Tetractinellida				Ancorinidae				Stelletta		dorsigera				Schmidt, 1864
176	Animalia		Porifera			Demospongiae			Tetractinellida				Ancorinidae				Stelletta		grubii				Schmidt, 1862
177	Animalia		Porifera			Demospongiae			Tetractinellida				Ancorinidae				Stelletta		hispida				(Buccich, 1886)
178	Animalia		Porifera			Demospongiae			Tetractinellida				Ancorinidae				Stelletta		mediterranea				(Topsent, 1893)
179	Animalia		Porifera			Demospongiae			Tetractinellida				Ancorinidae				Stelletta		stellata				Topsent, 1893
180	Animalia		Porifera			Demospongiae			Tetractinellida				Ancorinidae				Stryphnus	Stryphnus	mucronatus				(Schmidt, 1868)
181	Animalia		Porifera			Demospongiae			Tetractinellida				Ancorinidae				Stryphnus	Stryphnus	ponderosus				(Bowerbank, 1866)
182	Animalia		Porifera			Demospongiae			Tetractinellida				Azoricidae				Leiodermatium	Leiodermatium	lynceus				Schmidt, 1870
183	Animalia		Porifera			Demospongiae			Tetractinellida				Calthropellidae				Calthropella	Calthropella	pathologica				(Schmidt, 1868)
184	Animalia		Porifera			Demospongiae			Tetractinellida				Calthropellidae				Calthropella	Corticellopsis	stelligera				(Schmidt, 1868)
185	Animalia		Porifera			Demospongiae			Tetractinellida				Geodiidae				Erylus		discophorus				(Schmidt, 1862)
186	Animalia		Porifera			Demospongiae			Tetractinellida				Geodiidae				Geodia		conchilega				Schmidt, 1862
187	Animalia		Porifera			Demospongiae			Tetractinellida				Geodiidae				Geodia		cydonium				(Jameson, 1811)
188	Animalia		Porifera			Demospongiae			Tetractinellida				Geodiidae				Penares		euastrum				(Schmidt, 1868)
189	Animalia		Porifera			Demospongiae			Tetractinellida				Geodiidae				Penares		helleri				(Schmidt, 1864)
190	Animalia		Porifera			Demospongiae			Tetractinellida				Pachastrellidae				Pachastrella		monilifera				Schmidt, 1868
191	Animalia		Porifera			Demospongiae			Tetractinellida				Samidae				Samus		anonymus				Gray, 1867
192	Animalia		Porifera			Demospongiae			Tetractinellida				Tetillidae				Craniella		cranium				(Müller, 1776)
193	Animalia		Porifera			Demospongiae			Tetractinellida				Theneidae				Thenea		muricata				(Bowerbank, 1858)
194	Animalia		Porifera			Demospongiae			Tetractinellida				Theonellidae				Discodermia		polymorpha				Pisera & Vacelet, 2011
195	Animalia		Porifera			Demospongiae			Tetractinellida				Thoosidae				Alectona		millari				Carter, 1879
196	Animalia		Porifera			Demospongiae			Tetractinellida				Vulcanellidae				Poecillastra		compressa				(Bowerbank, 1866)
197	Animalia		Porifera			Demospongiae			Tetractinellida				Vulcanellidae				Vulcanella		gracilis				(Sollas, 1888)
198	Animalia		Porifera			Demospongiae			Verongiida				Aplysinidae				Aplysina		aerophoba				(Nardo, 1833)
199	Animalia		Porifera			Demospongiae			Verongiida				Aplysinidae				Aplysina		cavernicola				(Vacelet, 1959)
200	Animalia		Porifera			Demospongiae			Verongiida				Ianthellidae				Hexadella		pruvoti				Topsent, 1896
201	Animalia		Porifera			Demospongiae			Verongiida				Ianthellidae				Hexadella		racovitzai				Topsent, 1896
202	Animalia		Porifera			Hexactinellida			Lyssacinosida				Rossellidae				Sympagella		nux				Schmidt, 1870
203	Animalia		Porifera			Homoscleromorpha			Homosclerophorida				Oscarellidae				Oscarella		balibaloi				Pérez, Ivanisevic, Dubois, Pedel, Thomas, Tokina & Ereskovsky, 2011
204	Animalia		Porifera			Homoscleromorpha			Homosclerophorida				Oscarellidae				Oscarella		lobularis				(Schmidt, 1862)
205	Animalia		Porifera			Homoscleromorpha			Homosclerophorida				Oscarellidae				Oscarella		microlobata				Muricy, Boury-Esnault, Bézac & Vacelet, 1996
206	Animalia		Porifera			Homoscleromorpha			Homosclerophorida				Oscarellidae				Oscarella		tuberculata				(Schmidt, 1868)
207	Animalia		Porifera			Homoscleromorpha			Homosclerophorida				Oscarellidae				Pseudocorticium		jarrei				Boury-Esnault, Muricy, Gallissian & Vacelet, 1995
208	Animalia		Porifera			Homoscleromorpha			Homosclerophorida				Plakinidae				Corticium		candelabrum				Schmidt, 1862
209	Animalia		Porifera			Homoscleromorpha			Homosclerophorida				Plakinidae				Plakina		bowerbanki				(Sarà, 1960)
210	Animalia		Porifera			Homoscleromorpha			Homosclerophorida				Plakinidae				Plakina		dilopha				Schulze, 1880
211	Animalia		Porifera			Homoscleromorpha			Homosclerophorida				Plakinidae				Plakina		monolopha				Schulze, 1880
212	Animalia		Porifera			Homoscleromorpha			Homosclerophorida				Plakinidae				Plakina		trilopha				Schulze, 1880
213	Animalia		Porifera			Homoscleromorpha			Homosclerophorida				Plakinidae				Plakina		weinbergi				Muricy, Boury-Esnault, Bézac & Vacelet, 1998
214	Animalia		Porifera			Homoscleromorpha			Homosclerophorida				Plakinidae				Plakinastrella		copiosa				Schulze, 1880
215	Animalia		Porifera			Homoscleromorpha			Homosclerophorida				Plakinidae				Plakortis		simplex				Schulze, 1880

## Sheet: Materials
Taxon_Local_ID	typeStatus	catalogNumber	occurrenceDetails	occurrenceRemarks	recordNumber	recordedBy	individualID	individualCount	sex	lifeStage	reproductiveCondition	behavior	establishmentMeans	occurrenceStatus	preparations	disposition	otherCatalogNumbers	previousIdentifications	associatedMedia	associatedReferences	associatedOccurrences	associatedSequences	taxonID	scientificNameID	acceptedNameUsageID	parentNameUsageID	originalNameUsageID	nameAccordingToID	namePublishedInID	taxonConceptID	scientificName	acceptedNameUsage	parentNameUsage	originalNameUsage	nameAccordingTo	namePublishedIn	higherClassification	kingdom	phylum	class	order	family	genus	subgenus	specificEpithet	infraspecificEpithet	taxonRank	verbatimTaxonRank	scientificNameAuthorship
[truncated: 106 more columns]

## Sheet: ExternalLinks
Taxon_Local_ID	Link type	Link

## Sheet: SpeciesLists
Checklist of species of Porifera of Greece
Voultsiadou; Gerovasileiou; Bailly; 2016
Published in Biodiversity Data Journal
						SPECIES WITHOUT SUBGENERA
Species names scattered or assembled in various ways
CAREFUL: Usage of formulas. If you copy-paste in another worksheet, paste only the values!
You can use Taxon_Local_ID to link with the table taxa (in that case only species).
Taxon_Local_ID	Kingdom	Phylum	Class	Order	Family	Genus	Subgenus	Species	Authorship	Rank	Combination	ScientificNameFull	ScientificName	Author	Year	AuthorYear	AuthorshipSimple	AphiaID in WoRMS
1	Animalia	Porifera	Calcarea	Baerida	Petrobionidae	Petrobiona		massiliana	Vacelet & Lévi, 1958	species	orig	Petrobiona massiliana Vacelet & Lévi, 1958	Petrobiona massiliana	Vacelet & Lévi	1958	Vacelet & Lévi, 1958	Vacelet & Lévi, 1958	164644
2	Animalia	Porifera	Calcarea	Clathrinida	Clathrinidae	Clathrina		blanca	(Miklucho-Maclay, 1868)	species	new	Clathrina blanca (Miklucho-Maclay, 1868)	Clathrina blanca	Miklucho-Maclay	1868	Miklucho-Maclay, 1868	(Miklucho-Maclay, 1868)	233970
3	Animalia	Porifera	Calcarea	Clathrinida	Clathrinidae	Clathrina		clathrus	(Schmidt, 1864)	species	new	Clathrina clathrus (Schmidt, 1864)	Clathrina clathrus	Schmidt	1864	Schmidt, 1864	(Schmidt, 1864)	132275
4	Animalia	Porifera	Calcarea	Clathrinida	Leucettidae	Leucetta		solida	(Schmidt, 1862)	species	new	Leucetta solida (Schmidt, 1862)	Leucetta solida	Schmidt	1862	Schmidt, 1862	(Schmidt, 1862)	132286
5	Animalia	Porifera	Calcarea	Leucosolenida	Grantiidae	Leucandra		nausicaae	(Schuffner, 1877)	species	new	Leucandra nausicaae (Schuffner, 1877)	Leucandra nausicaae	Schuffner	1877	Schuffner, 1877	(Schuffner, 1877)	164353
6	Animalia	Porifera	Calcarea	Leucosolenida	Sycettidae	Sycon		elegans	(Bowerbank, 1845)	species	new	Sycon elegans (Bowerbank, 1845)	Sycon elegans	Bowerbank	1845	Bowerbank, 1845	(Bowerbank, 1845)	132252
7	Animalia	Porifera	Calcarea	Leucosolenida	Sycettidae	Sycon		faulkneri	Ilan, Gugel, Galil & Janussen, 2003	species	orig	Sycon faulkneri Ilan, Gugel, Galil & Janussen, 2003	Sycon faulkneri	Ilan, Gugel, Galil & Janussen	2003	Ilan, Gugel, Galil & Janussen, 2003	Ilan, Gugel, Galil & Janussen, 2003	164577
8	Animalia	Porifera	Calcarea	Leucosolenida	Sycettidae	Sycon		raphanus	Schmidt, 1862	species	orig	Sycon raphanus Schmidt, 1862	Sycon raphanus	Scacchi & Philippi	1862	Scacchi & Philippi, 1862	Scacchi & Philippi, 1862	132257
9	Animalia	Porifera	Demospongiae	Agelasida	Agelasidae	Agelas		oroides	(Schmidt, 1864)	species	new	Agelas oroides (Schmidt, 1864)	Agelas oroides	Schmidt	1864	Schmidt, 1864	(Schmidt, 1864)	132454
10	Animalia	Porifera	Demospongiae	Agelasida	Hymerhabdiidae	Hymerhabdia		intermedia	Sarà & Siribelli, 1960	species	orig	Hymerhabdia intermedia Sarà & Siribelli, 1960	Hymerhabdia intermedia	Sarà & Siribelli	1960	Sarà & Siribelli, 1960	Sarà & Siribelli, 1960	132524
11	Animalia	Porifera	Demospongiae	Agelasida	Hymerhabdiidae	Prosuberites		longispinus	Topsent, 1893	species	orig	Prosuberites longispinus Topsent, 1893	Prosuberites longispinus	Topsent	1893	Topsent, 1893	Topsent, 1893	134252
12	Animalia	Porifera	Demospongiae	Axinellida	Axinellidae	Axinella		cannabina	(Esper, 1794)	species	new	Axinella cannabina (Esper, 1794)	Axinella cannabina	Esper	1794	Esper, 1794	(Esper, 1794)	132470
13	Animalia	Porifera	Demospongiae	Axinellida	Axinellidae	Axinella		damicornis	(Esper, 1794)	species	new	Axinella damicornis (Esper, 1794)	Axinella damicornis	Esper	1794	Esper, 1794	(Esper, 1794)	132472
14	Animalia	Porifera	Demospongiae	Axinellida	Axinellidae	Axinella		polypoides	Schmidt, 1862	species	orig	Axinella polypoides Schmidt, 1862	Axinella polypoides	Schmidt	1862	Schmidt, 1862	Schmidt, 1862	132487
15	Animalia	Porifera	Demospongiae	Axinellida	Axinellidae	Axinella		verrucosa	(Esper, 1794)	species	new	Axinella verrucosa (Esper, 1794)	Axinella verrucosa	Esper	1794	Esper, 1794	(Esper, 1794)	132499
16	Animalia	Porifera	Demospongiae	Axinellida	Heteroxyidae	Didiscus		stylifer	Tsurnamal, 1969	species	orig	Didiscus stylifer Tsurnamal, 1969	Didiscus stylifer	Tsurnamal	1969	Tsurnamal, 1969	Tsurnamal, 1969	165978
17	Animalia	Porifera	Demospongiae	Axinellida	Heteroxyidae	Myrmekioderma		spelaeum	(Pulitzer-Finali, 1983)	species	new	Myrmekioderma spelaeum (Pulitzer-Finali, 1983)	Myrmekioderma spelaeum	Pulitzer-Finali	1983	Pulitzer-Finali, 1983	(Pulitzer-Finali, 1983)	166024
18	Animalia	Porifera	Demospongiae	Axinellida	Raspailiidae	Eurypon		cinctum	Sarà, 1960	species	orig	Eurypon cinctum Sarà, 1960	Eurypon cinctum	Sarà	1960	Sarà, 1960	Sarà, 1960	133106
19	Animalia	Porifera	Demospongiae	Axinellida	Raspailiidae	Eurypon		clavatum	(Bowerbank, 1866)	species	new	Eurypon clavatum (Bowerbank, 1866)	Eurypon clavatum	Bowerbank	1866	Bowerbank, 1866	(Bowerbank, 1866)	133107
20	Animalia	Porifera	Demospongiae	Axinellida	Raspailiidae	Eurypon		coronula	(Bowerbank, 1874)	species	new	Eurypon coronula (Bowerbank, 1874)	Eurypon coronula	Bowerbank	1874	Bowerbank, 1874	(Bowerbank, 1874)	133108
21	Animalia	Porifera	Demospongiae	Axinellida	Raspailiidae	Eurypon		major	Sarà & Siribelli, 1960	species	orig	Eurypon major Sarà & Siribelli, 1960	Eurypon major	Sarà & Siribelli	1960	Sarà & Siribelli, 1960	Sarà & Siribelli, 1960	133115
22	Animalia	Porifera	Demospongiae	Axinellida	Raspailiidae	Raspaciona		aculeata	(Johnston, 1842)	species	new	Raspaciona aculeata (Johnston, 1842)	Raspaciona aculeata	Johnston	1842	Johnston, 1842	(Johnston, 1842)	133139
23	Animalia	Porifera	Demospongiae	Axinellida	Raspailiidae	Raspailia	Raspailia	viminalis	Schmidt, 1862	species	orig	Raspailia viminalis Schmidt, 1862	Raspailia viminalis	Schmidt	1862	Schmidt, 1862	Schmidt, 1862	193190
24	Animalia	Porifera	Demospongiae	Axinellida	Stelligeridae	Paratimea		pierantonii	(Sarà, 1958)	species	new	Paratimea pierantonii (Sarà, 1958)	Paratimea pierantonii	Sarà	1958	Sarà, 1958	(Sarà, 1958)	134171
25	Animalia	Porifera	Demospongiae	Axinellida	Stelligeridae	Stelligera		stuposa	(Ellis & Solander, 1786)	species	new	Stelligera stuposa (Ellis & Solander, 1786)	Stelligera stuposa	Ellis & Solander	1786	Ellis & Solander, 1786	(Ellis & Solander, 1786)	134175
26	Animalia	Porifera	Demospongiae	Bubarida	Dictyonellidae	Acanthella		acuta	Schmidt, 1862	species	orig	Acanthella acuta Schmidt, 1862	Acanthella acuta	Schmidt	1862	Schmidt, 1862	Schmidt, 1862	132455
27	Animalia	Porifera	Demospongiae	Bubarida	Dictyonellidae	Dictyonella		incisa	(Schmidt, 1880)	species	new	Dictyonella incisa (Schmidt, 1880)	Dictyonella incisa	Schmidt	1880	Schmidt, 1880	(Schmidt, 1880)	132550
28	Animalia	Porifera	Demospongiae	Bubarida	Dictyonellidae	Dictyonella		marsilii	(Topsent, 1893)	species	new	Dictyonella marsilii (Topsent, 1893)	Dictyonella marsilii	Topsent	1893	Topsent, 1893	(Topsent, 1893)	132552
29	Animalia	Porifera	Demospongiae	Bubarida	Dictyonellidae	Dictyonella		obtusa	(Schmidt, 1862)	species	new	Dictyonella obtusa (Schmidt, 1862)	Dictyonella obtusa	Schmidt	1862	Schmidt, 1862	(Schmidt, 1862)	132553
30	Animalia	Porifera	Demospongiae	Bubarida	Dictyonellidae	Dictyonella		plicata	(Schmidt, 1880)	species	new	Dictyonella plicata (Schmidt, 1880)	Dictyonella plicata	Schmidt	1880	Schmidt, 1880	(Schmidt, 1880)	132555
31	Animalia	Porifera	Demospongiae	Chondrillida	Chondrillidae	Chondrilla		nucula	Schmidt, 1862	species	orig	Chondrilla nucula Schmidt, 1862	Chondrilla nucula	Schmidt	1862	Schmidt, 1862	Schmidt, 1862	134110
32	Animalia	Porifera	Demospongiae	Chondrillida	Chondrillidae	Thymosiopsis		cuticulatus	Vacelet & Perez, 1998	species	orig	Thymosiopsis cuticulatus Vacelet & Perez, 1998	Thymosiopsis cuticulatus	Vacelet & Perez	1998	Vacelet & Perez, 1998	Vacelet & Perez, 1998	134114
33	Animalia	Porifera	Demospongiae	Chondrillida	Halisarcidae	Halisarca		dujardinii	Johnston, 1842	species	orig	Halisarca dujardinii Johnston, 1842	Halisarca dujardinii	Johnston	1842	Johnston, 1842	Johnston, 1842	132736
34	Animalia	Porifera	Demospongiae	Chondrosiida	Chondrosiidae	Chondrosia		reniformis	Nardo, 1847	species	orig	Chondrosia reniformis Nardo, 1847	Chondrosia reniformis	Nardo	1847	Nardo, 1847	Nardo, 1847	134112
35	Animalia	Porifera	Demospongiae	Clionaida	Clionaidae	Cliona		celata	Grant, 1826	species	orig	Cliona celata Grant, 1826	Cliona celata	Grant	1826	Grant, 1826	Grant, 1826	134121
36	Animalia	Porifera	Demospongiae	Clionaida	Clionaidae	Cliona		parenzani	Corriero & Scalera-Liaci, 1997	species	orig	Cliona parenzani Corriero & Scalera-Liaci, 1997	Cliona parenzani	Corriero & Scalera-Liaci	1997	Corriero & Scalera-Liaci, 1997	Corriero & Scalera-Liaci, 1997	170466
37	Animalia	Porifera	Demospongiae	Clionaida	Clionaidae	Cliona		rhodensis	Rützler & Bromley, 1981	species	orig	Cliona rhodensis Rützler & Bromley, 1981	Cliona rhodensis	Rützler & Bromley	1981	Rützler & Bromley, 1981	Rützler & Bromley, 1981	134136
38	Animalia	Porifera	Demospongiae	Clionaida	Clionaidae	Cliona		schmidtii	(Ridley, 1881)	species	new	Cliona schmidtii (Ridley, 1881)	Cliona schmidtii	Ridley	1881	Ridley, 1881	(Ridley, 1881)	134139
39	Animalia	Porifera	Demospongiae	Clionaida	Clionaidae	Cliona		thoosina	Topsent, 1888	species	orig	Cliona thoosina Topsent, 1888	Cliona thoosina	Topsent	1888	Topsent, 1888	Topsent, 1888	170479
40	Animalia	Porifera	Demospongiae	Clionaida	Clionaidae	Cliona		viridis	(Schmidt, 1862)	species	new	Cliona viridis (Schmidt, 1862)	Cliona viridis	Schmidt	1862	Schmidt, 1862	(Schmidt, 1862)	134146
41	Animalia	Porifera	Demospongiae	Clionaida	Clionaidae	Spiroxya		heteroclita	Topsent, 1896	species	orig	Spiroxya heteroclita Topsent, 1896	Spiroxya heteroclita	Topsent	1896	Topsent, 1896	Topsent, 1896	134238
42	Animalia	Porifera	Demospongiae	Clionaida	Spirastrellidae	Diplastrella		bistellata	(Schmidt, 1862)	species	new	Diplastrella bistellata (Schmidt, 1862)	Diplastrella bistellata	Schmidt	1862	Schmidt, 1862	(Schmidt, 1862)	134317
43	Animalia	Porifera	Demospongiae	Clionaida	Spirastrellidae	Diplastrella		ornata	Rützler & Sarà, 1962	species	orig	Diplastrella ornata Rützler & Sarà, 1962	Diplastrella ornata	Rützler & Sarà	1962	Rützler & Sarà, 1962	Rützler & Sarà, 1962	134318
44	Animalia	Porifera	Demospongiae	Clionaida	Spirastrellidae	Spirastrella		cunctatrix	Schmidt, 1868	species	orig	Spirastrella cunctatrix Schmidt, 1868	Spirastrella cunctatrix	Schmidt	1868	Schmidt, 1868	Schmidt, 1868	134235
45	Animalia	Porifera	Demospongiae	Dendroceratida	Darwinellidae	Aplysilla		rosea	(Barrois, 1876)	species	new	Aplysilla rosea (Barrois, 1876)	Aplysilla rosea	Barrois	1876	Barrois, 1876	(Barrois, 1876)	132296
46	Animalia	Porifera	Demospongiae	Dendroceratida	Darwinellidae	Dendrilla		acantha	Vacelet, 1958	species	orig	Dendrilla acantha Vacelet, 1958	Dendrilla acantha	Vacelet	1958	Vacelet, 1958	Vacelet, 1958	132312
47	Animalia	Porifera	Demospongiae	Dendroceratida	Dictyodendrillidae	Spongionella		pulchella	(Sowerby, 1804)	species	new	Spongionella pulchella (Sowerby, 1804)	Spongionella pulchella	Sowerby	1804	Sowerby, 1804	(Sowerby, 1804)	132335
48	Animalia	Porifera	Demospongiae	Desmacellida	Desmacellidae	Desmacella		annexa	Schmidt, 1870	species	orig	Desmacella annexa Schmidt, 1870	Desmacella annexa	Schmidt	1870	Schmidt, 1870	Schmidt, 1870	133206
49	Animalia	Porifera	Demospongiae	Desmacellida	Desmacellidae	Desmacella		inornata	(Bowerbank, 1866)	species	new	Desmacella inornata (Bowerbank, 1866)	Desmacella inornata	Bowerbank	1866	Bowerbank, 1866	(Bowerbank, 1866)	133213
50	Animalia	Porifera	Demospongiae	Dictyoceratida	Dysideidae	Dysidea		avara	(Schmidt, 1862)	species	new	Dysidea avara (Schmidt, 1862)	Dysidea avara	Schmidt	1862	Schmidt, 1862	(Schmidt, 1862)	132321
51	Animalia	Porifera	Demospongiae	Dictyoceratida	Dysideidae	Dysidea		fragilis	(Montagu, 1814)	species	new	Dysidea fragilis (Montagu, 1814)	Dysidea fragilis	Montagu	1814	Montagu, 1814	(Montagu, 1814)	132324
52	Animalia	Porifera	Demospongiae	Dictyoceratida	Dysideidae	Dysidea		incrustans	(Schmidt, 1862)	species	new	Dysidea incrustans (Schmidt, 1862)	Dysidea incrustans	Schmidt	1862	Schmidt, 1862	(Schmidt, 1862)	132325
53	Animalia	Porifera	Demospongiae	Dictyoceratida	Dysideidae	Dysidea		tupha	(Martens, 1824)	species	new	Dysidea tupha (Martens, 1824)	Dysidea tupha	Martens	1824	Martens, 1824	(Martens, 1824)	184496
54	Animalia	Porifera	Demospongiae	Dictyoceratida	Dysideidae	Pleraplysilla		spinifera	(Schulze, 1879)	species	new	Pleraplysilla spinifera (Schulze, 1879)	Pleraplysilla spinifera	Schulze	1879	Schulze, 1879	(Schulze, 1879)	132317
55	Animalia	Porifera	Demospongiae	Dictyoceratida	Irciniidae	Ircinia		dendroides	(Schmidt, 1862)	species	new	Ircinia dendroides (Schmidt, 1862)	Ircinia dendroides	Schmidt	1862	Schmidt, 1862	(Schmidt, 1862)	132349
56	Animalia	Porifera	Demospongiae	Dictyoceratida	Irciniidae	Ircinia		oros	(Schmidt, 1864)	species	new	Ircinia oros (Schmidt, 1864)	Ircinia oros	Schmidt	1864	Schmidt, 1864	(Schmidt, 1864)	132356
57	Animalia	Porifera	Demospongiae	Dictyoceratida	Irciniidae	Ircinia		paucifilamentosa	Vacelet, 1961	species	orig	Ircinia paucifilamentosa Vacelet, 1961	Ircinia paucifilamentosa	Vacelet	1961	Vacelet, 1961	Vacelet, 1961	132357
58	Animalia	Porifera	Demospongiae	Dictyoceratida	Irciniidae	Ircinia		retidermata	Pulitzer-Finali & Pronzato, 1981	species	orig	Ircinia retidermata Pulitzer-Finali & Pronzato, 1981	Ircinia retidermata	Pulitzer-Finali & Pronzato	1981	Pulitzer-Finali & Pronzato, 1981	Pulitzer-Finali & Pronzato, 1981	132360
59	Animalia	Porifera	Demospongiae	Dictyoceratida	Irciniidae	Ircinia		variabilis	(Schmidt, 1862)	species	new	Ircinia variabilis (Schmidt, 1862)	Ircinia variabilis	Schmidt	1862	Schmidt, 1862	(Schmidt, 1862)	132362
60	Animalia	Porifera	Demospongiae	Dictyoceratida	Irciniidae	Ircinia		vestibulata	(Szymanski, 1904)	species	new	Ircinia vestibulata (Szymanski, 1904)	Ircinia vestibulata	Szymanski	1904	Szymanski, 1904	(Szymanski, 1904)	447737
61	Animalia	Porifera	Demospongiae	Dictyoceratida	Irciniidae	Sarcotragus		foetidus	Schmidt, 1862	species	orig	Sarcotragus foetidus Schmidt, 1862	Sarcotragus foetidus	Schmidt	1862	Schmidt, 1862	Schmidt, 1862	132371
62	Animalia	Porifera	Demospongiae	Dictyoceratida	Irciniidae	Sarcotragus		pipetta	(Schmidt, 1868)	species	new	Sarcotragus pipetta (Schmidt, 1868)	Sarcotragus pipetta	Schmidt	1868	Schmidt, 1868	(Schmidt, 1868)	165085
63	Animalia	Porifera	Demospongiae	Dictyoceratida	Irciniidae	Sarcotragus		spinosulus	Schmidt, 1862	species	orig	Sarcotragus spinosulus Schmidt, 1862	Sarcotragus spinosulus	Schmidt	1862	Schmidt, 1862	Schmidt, 1862	165086
64	Animalia	Porifera	Demospongiae	Dictyoceratida	Spongiidae	Coscinoderma		sporadense	Voultsiadou-Koukoura, van Soest & Koukouras, 1991	species	orig	Coscinoderma sporadense Voultsiadou-Koukoura, van Soest & Koukouras, 1991	Coscinoderma sporadense	Voultsiadou-Koukoura, van Soest & Koukouras	1991	Voultsiadou-Koukoura, van Soest & Koukouras, 1991	Voultsiadou-Koukoura, van Soest & Koukouras, 1991	132375
65	Animalia	Porifera	Demospongiae	Dictyoceratida	Spongiidae	Hippospongia		communis	(Lamarck, 1814)	species	new	Hippospongia communis (Lamarck, 1814)	Hippospongia communis	Lamarck	1814	Lamarck, 1814	(Lamarck, 1814)	132377
66	Animalia	Porifera	Demospongiae	Dictyoceratida	Spongiidae	Spongia	Spongia	lamella	(Schulze, 1879)	species	new	Spongia lamella (Schulze, 1879)	Spongia lamella	Schulze	1879	Schulze, 1879	(Schulze, 1879)	556512
67	Animalia	Porifera	Demospongiae	Dictyoceratida	Spongiidae	Spongia	Spongia	nitens	(Schmidt, 1862)	species	new	Spongia nitens (Schmidt, 1862)	Spongia nitens	Schmidt	1862	Schmidt, 1862	(Schmidt, 1862)	132405
68	Animalia	Porifera	Demospongiae	Dictyoceratida	Spongiidae	Spongia	Spongia	officinalis	Linnaeus, 1759	species	orig	Spongia officinalis Linnaeus, 1759	Spongia officinalis	Linnaeus	1759	Linnaeus, 1759	Linnaeus, 1759	132407
69	Animalia	Porifera	Demospongiae	Dictyoceratida	Spongiidae	Spongia	Spongia	virgultosa	(Schmidt, 1868)	species	new	Spongia virgultosa (Schmidt, 1868)	Spongia virgultosa	Schmidt	1868	Schmidt, 1868	(Schmidt, 1868)	193649
70	Animalia	Porifera	Demospongiae	Dictyoceratida	Spongiidae	Spongia	Spongia	zimocca	Schmidt, 1862	species	orig	Spongia zimocca Schmidt, 1862	Spongia zimocca	Schmidt	1862	Schmidt, 1862	Schmidt, 1862	132430
71	Animalia	Porifera	Demospongiae	Dictyoceratida	Thorectidae	Cacospongia		mollior	Schmidt, 1862	species	orig	Cacospongia mollior Schmidt, 1862	Cacospongia mollior	Schmidt	1862	Schmidt, 1862	Schmidt, 1862	132439
72	Animalia	Porifera	Demospongiae	Dictyoceratida	Thorectidae	Fasciospongia		cavernosa	(Schmidt, 1862)	species	new	Fasciospongia cavernosa (Schmidt, 1862)	Fasciospongia cavernosa	Schmidt	1862	Schmidt, 1862	(Schmidt, 1862)	132444
73	Animalia	Porifera	Demospongiae	Dictyoceratida	Thorectidae	Hyrtios		collectrix	(Schulze, 1880)	species	new	Hyrtios collectrix (Schulze, 1880)	Hyrtios collectrix	Schulze	1880	Schulze, 1880	(Schulze, 1880)	132448
74	Animalia	Porifera	Demospongiae	Dictyoceratida	Thorectidae	Scalarispongia		scalaris	(Schmidt, 1862)	species	new	Scalarispongia scalaris (Schmidt, 1862)	Scalarispongia scalaris	Schmidt	1862	Schmidt, 1862	(Schmidt, 1862)	165376
75	Animalia	Porifera	Demospongiae	Haplosclerida	Callyspongiidae	Callyspongia		septimaniensis	Griessinger, 1971	species	orig	Callyspongia septimaniensis Griessinger, 1971	Callyspongia septimaniensis	Griessinger	1971	Griessinger, 1971	Griessinger, 1971	132742
76	Animalia	Porifera	Demospongiae	Haplosclerida	Callyspongiidae	Siphonochalina		expansa	Sarà, 1960	species	orig	Siphonochalina expansa Sarà, 1960	Siphonochalina expansa	Sarà	1960	Sarà, 1960	Sarà, 1960	132747
77	Animalia	Porifera	Demospongiae	Haplosclerida	Chalinidae	Dendroxea		lenis	(Topsent, 1892)	species	new	Dendroxea lenis (Topsent, 1892)	Dendroxea lenis	Topsent	1892	Topsent, 1892	(Topsent, 1892)	132768
78	Animalia	Porifera	Demospongiae	Haplosclerida	Chalinidae	Haliclona	Gellius	dubia	(Babic, 1922)	species	new	Haliclona dubia (Babic, 1922)	Haliclona dubia	Babic	1922	Babic, 1922	(Babic, 1922)	132795
79	Animalia	Porifera	Demospongiae	Haplosclerida	Chalinidae	Haliclona	Gellius	fibulata	(Schmidt, 1862)	species	new	Haliclona fibulata (Schmidt, 1862)	Haliclona fibulata	Schmidt	1862	Schmidt, 1862	(Schmidt, 1862)	236314
80	Animalia	Porifera	Demospongiae	Haplosclerida	Chalinidae	Haliclona	Gellius	microsigma	(Babic, 1922)	species	new	Haliclona microsigma (Babic, 1922)	Haliclona microsigma	Babic	1922	Babic, 1922	(Babic, 1922)	132824
81	Animalia	Porifera	Demospongiae	Haplosclerida	Chalinidae	Haliclona	Halichoclona	fulva	(Topsent, 1893)	species	new	Haliclona fulva (Topsent, 1893)	Haliclona fulva	Topsent	1893	Topsent, 1893	(Topsent, 1893)	234279
82	Animalia	Porifera	Demospongiae	Haplosclerida	Chalinidae	Haliclona	Halichoclona	perlucida	(Griessinger, 1971)	species	new	Haliclona perlucida (Griessinger, 1971)	Haliclona perlucida	Griessinger	1971	Griessinger, 1971	(Griessinger, 1971)	595033
83	Animalia	Porifera	Demospongiae	Haplosclerida	Chalinidae	Haliclona	Haliclona	simulans	(Johnston, 1842)	species	new	Haliclona simulans (Johnston, 1842)	Haliclona simulans	Johnston	1842	Johnston, 1842	(Johnston, 1842)	236331
84	Animalia	Porifera	Demospongiae	Haplosclerida	Chalinidae	Haliclona	Reniera	aquaeductus	(Schmidt, 1862)	species	new	Haliclona aquaeductus (Schmidt, 1862)	Haliclona aquaeductus	Schmidt	1862	Schmidt, 1862	(Schmidt, 1862)	345571
85	Animalia	Porifera	Demospongiae	Haplosclerida	Chalinidae	Haliclona	Reniera	cinerea	(Grant, 1826)	species	new	Haliclona cinerea (Grant, 1826)	Haliclona cinerea	Grant	1826	Grant, 1826	(Grant, 1826)	166605
86	Animalia	Porifera	Demospongiae	Haplosclerida	Chalinidae	Haliclona	Reniera	cratera	(Schmidt, 1862)	species	new	Haliclona cratera (Schmidt, 1862)	Haliclona cratera	Schmidt	1862	Schmidt, 1862	(Schmidt, 1862)	191476
87	Animalia	Porifera	Demospongiae	Haplosclerida	Chalinidae	Haliclona	Reniera	mediterranea	Griessinger, 1971	species	orig	Haliclona mediterranea Griessinger, 1971	Haliclona mediterranea	Griessinger	1971	Griessinger, 1971	Griessinger, 1971	132821
88	Animalia	Porifera	Demospongiae	Haplosclerida	Chalinidae	Haliclona	Reniera	subtilis	Griessinger, 1971	species	orig	Haliclona subtilis Griessinger, 1971	Haliclona subtilis	Griessinger	1971	Griessinger, 1971	Griessinger, 1971	191480
89	Animalia	Porifera	Demospongiae	Haplosclerida	Chalinidae	Haliclona	Rhizoniera	rhizophora	(Vacelet, 1969)	species	new	Haliclona rhizophora (Vacelet, 1969)	Haliclona rhizophora	Vacelet	1969	Vacelet, 1969	(Vacelet, 1969)	842763
90	Animalia	Porifera	Demospongiae	Haplosclerida	Chalinidae	Haliclona	Rhizoniera	sarai	(Pulitzer-Finali, 1969)	species	new	Haliclona sarai (Pulitzer-Finali, 1969)	Haliclona sarai	Pulitzer-Finali	1969	Pulitzer-Finali, 1969	(Pulitzer-Finali, 1969)	132854
91	Animalia	Porifera	Demospongiae	Haplosclerida	Chalinidae	Haliclona	Soestella	implexa	(Schmidt, 1868)	species	new	Haliclona implexa (Schmidt, 1868)	Haliclona implexa	Schmidt	1868	Schmidt, 1868	(Schmidt, 1868)	132810
92	Animalia	Porifera	Demospongiae	Haplosclerida	Chalinidae	Haliclona	Soestella	mamillata	(Griessinger, 1971)	species	new	Haliclona mamillata (Griessinger, 1971)	Haliclona mamillata	Griessinger	1971	Griessinger, 1971	(Griessinger, 1971)	132819
93	Animalia	Porifera	Demospongiae	Haplosclerida	Chalinidae	Haliclona	Soestella	mucosa	(Griessinger, 1971)	species	new	Haliclona mucosa (Griessinger, 1971)	Haliclona mucosa	Griessinger	1971	Griessinger, 1971	(Griessinger, 1971)	132830
94	Animalia	Porifera	Demospongiae	Haplosclerida	Niphatidae	Pachychalina		rustica	Schmidt, 1868	species	orig	Pachychalina rustica Schmidt, 1868	Pachychalina rustica	Schmidt	1868	Schmidt, 1868	Schmidt, 1868	132912
95	Animalia	Porifera	Demospongiae	Haplosclerida	Petrosiidae	Petrosia	Petrosia	clavata	(Esper, 1794)	species	new	Petrosia clavata (Esper, 1794)	Petrosia clavata	Esper	1794	Esper, 1794	(Esper, 1794)	132918
96	Animalia	Porifera	Demospongiae	Haplosclerida	Petrosiidae	Petrosia	Petrosia	ficiformis	(Poiret, 1789)	species	new	Petrosia ficiformis (Poiret, 1789)	Petrosia ficiformis	Poiret	1789	Poiret, 1789	(Poiret, 1789)	132920
97	Animalia	Porifera	Demospongiae	Haplosclerida	Petrosiidae	Petrosia		pulitzeri	Pansini, 1996	species	orig	Petrosia pulitzeri Pansini, 1996	Petrosia pulitzeri	Pansini	1996	Pansini, 1996	Pansini, 1996	383231
98	Animalia	Porifera	Demospongiae	Haplosclerida	Phloeodictyidae	Calyx		nicaeensis	(Risso, 1826)	species	new	Calyx nicaeensis (Risso, 1826)	Calyx nicaeensis	Risso	1826	Risso, 1826	(Risso, 1826)	166932
99	Animalia	Porifera	Demospongiae	Merliida	Hamacanthidae	Hamacantha	Vomerula	falcula	(Bowerbank, 1874)	species	new	Hamacantha falcula (Bowerbank, 1874)	Hamacantha falcula	Bowerbank	1874	Bowerbank, 1874	(Bowerbank, 1874)	133231
100	Animalia	Porifera	Demospongiae	Merliida	Merliidae	Merlia		normani	Kirkpatrick, 1908	species	orig	Merlia normani Kirkpatrick, 1908	Merlia normani	Kirkpatrick	1908	Kirkpatrick, 1908	Kirkpatrick, 1908	168482
101	Animalia	Porifera	Demospongiae	Poecilosclerida	Coelosphaeridae	Forcepia	Leptolabis	luciensis	(Topsent, 1888)	species	new	Forcepia luciensis (Topsent, 1888)	Forcepia luciensis	Topsent	1888	Topsent, 1888	(Topsent, 1888)	133384
102	Animalia	Porifera	Demospongiae	Poecilosclerida	Coelosphaeridae	Lissodendoryx	Lissodendoryx	isodictyalis	(Carter, 1882)	species	new	Lissodendoryx isodictyalis (Carter, 1882)	Lissodendoryx isodictyalis	Carter	1882	Carter, 1882	(Carter, 1882)	133436
103	Animalia	Porifera	Demospongiae	Poecilosclerida	Crambeidae	Crambe		crambe	(Schmidt, 1862)	species	new	Crambe crambe (Schmidt, 1862)	Crambe crambe	Schmidt	1862	Schmidt, 1862	(Schmidt, 1862)	133445
104	Animalia	Porifera	Demospongiae	Poecilosclerida	Crellidae	Crella	Pytheas	fusifera	Sarà, 1969	species	orig	Crella fusifera Sarà, 1969	Crella fusifera	Sarà	1969	Sarà, 1969	Sarà, 1969	133466
105	Animalia	Porifera	Demospongiae	Poecilosclerida	Crellidae	Crella	Pytheas	sigmata	Topsent, 1925	species	orig	Crella sigmata Topsent, 1925	Crella sigmata	Topsent	1925	Topsent, 1925	Topsent, 1925	133490
106	Animalia	Porifera	Demospongiae	Poecilosclerida	Esperiopsidae	Ulosa		stuposa	(Esper, 1794)	species	new	Ulosa stuposa (Esper, 1794)	Ulosa stuposa	Esper	1794	Esper, 1794	(Esper, 1794)	133323
107	Animalia	Porifera	Demospongiae	Poecilosclerida	Esperiopsidae	Ulosa		tenellula	Pulitzer-Finali, 1983	species	orig	Ulosa tenellula Pulitzer-Finali, 1983	Ulosa tenellula	Pulitzer-Finali	1983	Pulitzer-Finali, 1983	Pulitzer-Finali, 1983	133324
108	Animalia	Porifera	Demospongiae	Poecilosclerida	Hymedesmiidae	Hemimycale		columella	(Bowerbank, 1874)	species	new	Hemimycale columella (Bowerbank, 1874)	Hemimycale columella	Bowerbank	1874	Bowerbank, 1874	(Bowerbank, 1874)	133543
109	Animalia	Porifera	Demospongiae	Poecilosclerida	Hymedesmiidae	Hymedesmia	Hymedesmia	pansa	Bowerbank, 1882	species	orig	Hymedesmia pansa Bowerbank, 1882	Hymedesmia pansa	Bowerbank	1882	Bowerbank, 1882	Bowerbank, 1882	191900
110	Animalia	Porifera	Demospongiae	Poecilosclerida	Hymedesmiidae	Hymedesmia	Hymedesmia	peachii	Bowerbank, 1882	species	orig	Hymedesmia peachii Bowerbank, 1882	Hymedesmia peachii	Bowerbank	1882	Bowerbank, 1882	Bowerbank, 1882	191904
111	Animalia	Porifera	Demospongiae	Poecilosclerida	Hymedesmiidae	Hymedesmia	Hymedesmia	simillima	Lundbeck, 1910	species	orig	Hymedesmia simillima Lundbeck, 1910	Hymedesmia simillima	Lundbeck	1910	Lundbeck, 1910	Lundbeck, 1910	191921
112	Animalia	Porifera	Demospongiae	Poecilosclerida	Hymedesmiidae	Hymedesmia	Hymedesmia	versicolor	(Topsent, 1893)	species	new	Hymedesmia versicolor (Topsent, 1893)	Hymedesmia versicolor	Topsent	1893	Topsent, 1893	(Topsent, 1893)	236415
113	Animalia	Porifera	Demospongiae	Poecilosclerida	Hymedesmiidae	Phorbas		fictitius	(Bowerbank, 1866)	species	new	Phorbas fictitius (Bowerbank, 1866)	Phorbas fictitius	Bowerbank	1866	Bowerbank, 1866	(Bowerbank, 1866)	133679
114	Animalia	Porifera	Demospongiae	Poecilosclerida	Hymedesmiidae	Phorbas		posidoni	Voultsiadou-Koukoura & van Soest, 1991	species	orig	Phorbas posidoni Voultsiadou-Koukoura & van Soest, 1991	Phorbas posidoni	Voultsiadou-Koukoura & van Soest	1991	Voultsiadou-Koukoura & van Soest, 1991	Voultsiadou-Koukoura & van Soest, 1991	133689
115	Animalia	Porifera	Demospongiae	Poecilosclerida	Hymedesmiidae	Phorbas		tenacior	(Topsent, 1925)	species	new	Phorbas tenacior (Topsent, 1925)	Phorbas tenacior	Topsent	1925	Topsent, 1925	(Topsent, 1925)	133693
116	Animalia	Porifera	Demospongiae	Poecilosclerida	Hymedesmiidae	Phorbas		topsenti	Vacelet & Perez, 2008	species	orig	Phorbas topsenti Vacelet & Perez, 2008	Phorbas topsenti	Vacelet & Perez	2008	Vacelet & Perez, 2008	Vacelet & Perez, 2008	367374
117	Animalia	Porifera	Demospongiae	Poecilosclerida	Microcionidae	Antho	Antho	involvens	(Schmidt, 1864)	species	new	Antho involvens (Schmidt, 1864)	Antho involvens	Schmidt	1864	Schmidt, 1864	(Schmidt, 1864)	132985
118	Animalia	Porifera	Demospongiae	Poecilosclerida	Microcionidae	Clathria	Clathria	toxistricta	Topsent, 1925	species	orig	Clathria toxistricta Topsent, 1925	Clathria toxistricta	Topsent	1925	Topsent, 1925	Topsent, 1925	133051
119	Animalia	Porifera	Demospongiae	Poecilosclerida	Microcionidae	Clathria	Clathria	toxistyla	(Sarà, 1959)	species	new	Clathria toxistyla (Sarà, 1959)	Clathria toxistyla	Sarà	1959	Sarà, 1959	(Sarà, 1959)	133052
120	Animalia	Porifera	Demospongiae	Poecilosclerida	Microcionidae	Clathria	Clathria	toxivaria	(Sarà, 1959)	species	new	Clathria toxivaria (Sarà, 1959)	Clathria toxivaria	Sarà	1959	Sarà, 1959	(Sarà, 1959)	408856
121	Animalia	Porifera	Demospongiae	Poecilosclerida	Microcionidae	Clathria	Microciona	cleistochela	(Topsent, 1925)	species	new	Clathria cleistochela (Topsent, 1925)	Clathria cleistochela	Topsent	1925	Topsent, 1925	(Topsent, 1925)	133011
122	Animalia	Porifera	Demospongiae	Poecilosclerida	Microcionidae	Clathria	Microciona	gradalis	Topsent, 1925	species	orig	Clathria gradalis Topsent, 1925	Clathria gradalis	Topsent	1925	Topsent, 1925	Topsent, 1925	133025
123	Animalia	Porifera	Demospongiae	Poecilosclerida	Microcionidae	Clathria	Thalysias	jolicoeuri	(Topsent, 1892)	species	new	Clathria jolicoeuri (Topsent, 1892)	Clathria jolicoeuri	Topsent	1892	Topsent, 1892	(Topsent, 1892)	167744
124	Animalia	Porifera	Demospongiae	Poecilosclerida	Microcionidae	Echinoclathria		translata	(Pulitzer-Finali, 1978)	species	new	Echinoclathria translata (Pulitzer-Finali, 1978)	Echinoclathria translata	Pulitzer-Finali	1978	Pulitzer-Finali, 1978	(Pulitzer-Finali, 1978)	167932
125	Animalia	Porifera	Demospongiae	Poecilosclerida	Mycalidae	Mycale	Aegogropila	contarenii	(Lieberkühn, 1859)	species	new	Mycale contarenii (Lieberkühn, 1859)	Mycale contarenii	Lieberkühn	1859	Lieberkühn, 1859	(Lieberkühn, 1859)	416453
126	Animalia	Porifera	Demospongiae	Poecilosclerida	Mycalidae	Mycale	Aegogropila	retifera	Topsent, 1924	species	orig	Mycale retifera Topsent, 1924	Mycale retifera	Topsent	1924	Topsent, 1924	Topsent, 1924	133301
127	Animalia	Porifera	Demospongiae	Poecilosclerida	Mycalidae	Mycale	Aegogropila	rotalis	(Bowerbank, 1874)	species	new	Mycale rotalis (Bowerbank, 1874)	Mycale rotalis	Bowerbank	1874	Bowerbank, 1874	(Bowerbank, 1874)	133302
128	Animalia	Porifera	Demospongiae	Poecilosclerida	Mycalidae	Mycale	Aegogropila	syrinx	(Schmidt, 1862)	species	new	Mycale syrinx (Schmidt, 1862)	Mycale syrinx	Schmidt	1862	Schmidt, 1862	(Schmidt, 1862)	133307
129	Animalia	Porifera	Demospongiae	Poecilosclerida	Mycalidae	Mycale	Aegogropila	tunicata	(Schmidt, 1862)	species	new	Mycale tunicata (Schmidt, 1862)	Mycale tunicata	Schmidt	1862	Schmidt, 1862	(Schmidt, 1862)	133311
130	Animalia	Porifera	Demospongiae	Poecilosclerida	Mycalidae	Mycale	Carmia	macilenta	(Bowerbank, 1866)	species	new	Mycale macilenta (Bowerbank, 1866)	Mycale macilenta	Bowerbank	1866	Bowerbank, 1866	(Bowerbank, 1866)	133293
131	Animalia	Porifera	Demospongiae	Poecilosclerida	Mycalidae	Mycale	Mycale	lingua	(Bowerbank, 1866)	species	new	Mycale lingua (Bowerbank, 1866)	Mycale lingua	Bowerbank	1866	Bowerbank, 1866	(Bowerbank, 1866)	133289
132	Animalia	Porifera	Demospongiae	Poecilosclerida	Mycalidae	Mycale	Mycale	massa	(Schmidt, 1862)	species	new	Mycale massa (Schmidt, 1862)	Mycale massa	Schmidt	1862	Schmidt, 1862	(Schmidt, 1862)	133295
133	Animalia	Porifera	Demospongiae	Poecilosclerida	Mycalidae	Mycale	Paresperella	serrulata	Sarà & Siribelli, 1960	species	orig	Mycale serrulata Sarà & Siribelli, 1960	Mycale serrulata	Sarà & Siribelli	1960	Sarà & Siribelli, 1960	Sarà & Siribelli, 1960	133304
134	Animalia	Porifera	Demospongiae	Poecilosclerida	Myxillidae	Myxilla	Myxilla	rosacea	(Lieberkühn, 1859)	species	new	Myxilla rosacea (Lieberkühn, 1859)	Myxilla rosacea	Lieberkühn	1859	Lieberkühn, 1859	(Lieberkühn, 1859)	133895
135	Animalia	Porifera	Demospongiae	Poecilosclerida	Tedaniidae	Tedania	Tedania	anhelans	(Vio in Olivi, 1792)	species	new	Tedania anhelans (Vio in Olivi, 1792)	Tedania anhelans	Vio in Olivi	1792	Vio in Olivi, 1792	(Vio in Olivi, 1792)	133904
136	Animalia	Porifera	Demospongiae	Polymastiida	Polymastiidae	Tentorium		levantinum	Ilan, Gugel, Galil & Janussen, 2003	species	orig	Tentorium levantinum Ilan, Gugel, Galil & Janussen, 2003	Tentorium levantinum	Ilan, Gugel, Galil & Janussen	2003	Ilan, Gugel, Galil & Janussen, 2003	Ilan, Gugel, Galil & Janussen, 2003	170688
137	Animalia	Porifera	Demospongiae	Polymastiida	Polymastiidae	Weberella		verrucosa	Vacelet, 1960	species	orig	Weberella verrucosa Vacelet, 1960	Weberella verrucosa	Vacelet	1960	Vacelet, 1960	Vacelet, 1960	134233
138	Animalia	Porifera	Demospongiae	Scopalinida	Scopalinidae	Scopalina		lophyropoda	Schmidt, 1862	species	orig	Scopalina lophyropoda Schmidt, 1862	Scopalina lophyropoda	Schmidt	1862	Schmidt, 1862	Schmidt, 1862	132557
139	Animalia	Porifera	Demospongiae	Spongillida	Spongillidae	Ephydatia		fluviatilis	(Linnaeus, 1759)	species	new	Ephydatia fluviatilis (Linnaeus, 1759)	Ephydatia fluviatilis	Linnaeus	1759	Linnaeus, 1759	(Linnaeus, 1759)	167144
140	Animalia	Porifera	Demospongiae	Spongillida	Spongillidae	Eunapius		carteri	(Bowerbank, 1863)	species	new	Eunapius carteri (Bowerbank, 1863)	Eunapius carteri	Bowerbank	1863	Bowerbank, 1863	(Bowerbank, 1863)	167156
141	Animalia	Porifera	Demospongiae	Suberitida	Halichondriidae	Axinyssa		aurantiaca	(Schmidt, 1864)	species	new	Axinyssa aurantiaca (Schmidt, 1864)	Axinyssa aurantiaca	Schmidt	1864	Schmidt, 1864	(Schmidt, 1864)	165741
142	Animalia	Porifera	Demospongiae	Suberitida	Halichondriidae	Axinyssa		michaelis	Kefalas & Castritsi-Catharios, 2007	species	orig	Axinyssa michaelis Kefalas & Castritsi-Catharios, 2007	Axinyssa michaelis	Kefalas & Castritsi-Catharios	2007	Kefalas & Castritsi-Catharios, 2007	Kefalas & Castritsi-Catharios, 2007	255156
143	Animalia	Porifera	Demospongiae	Suberitida	Halichondriidae	Halichondria	Halichondria	contorta	(Sarà, 1961)	species	new	Halichondria contorta (Sarà, 1961)	Halichondria contorta	Sarà	1961	Sarà, 1961	(Sarà, 1961)	132592
144	Animalia	Porifera	Demospongiae	Suberitida	Halichondriidae	Halichondria	Halichondria	panicea	(Pallas, 1766)	species	new	Halichondria panicea (Pallas, 1766)	Halichondria panicea	Pallas	1766	Pallas, 1766	(Pallas, 1766)	132627
145	Animalia	Porifera	Demospongiae	Suberitida	Halichondriidae	Hymeniacidon		perlevis	(Montagu, 1814)	species	new	Hymeniacidon perlevis (Montagu, 1814)	Hymeniacidon perlevis	Montagu	1814	Montagu, 1814	(Montagu, 1814)	132663
146	Animalia	Porifera	Demospongiae	Suberitida	Halichondriidae	Laminospongia		subtilis	Pulitzer-Finali, 1983	species	orig	Laminospongia subtilis Pulitzer-Finali, 1983	Laminospongia subtilis	Pulitzer-Finali	1983	Pulitzer-Finali, 1983	Pulitzer-Finali, 1983	132667
147	Animalia	Porifera	Demospongiae	Suberitida	Halichondriidae	Spongosorites		flavens	Pulitzer-Finali, 1983	species	orig	Spongosorites flavens Pulitzer-Finali, 1983	Spongosorites flavens	Pulitzer-Finali	1983	Pulitzer-Finali, 1983	Pulitzer-Finali, 1983	132719
148	Animalia	Porifera	Demospongiae	Suberitida	Halichondriidae	Spongosorites		intricatus	(Topsent, 1892)	species	new	Spongosorites intricatus (Topsent, 1892)	Spongosorites intricatus	Topsent	1892	Topsent, 1892	(Topsent, 1892)	132721
149	Animalia	Porifera	Demospongiae	Suberitida	Halichondriidae	Topsentia		vaceleti	Kefalas & Castritsi-Catharios, 2012	species	orig	Topsentia vaceleti Kefalas & Castritsi-Catharios, 2012	Topsentia vaceleti	Kefalas & Castritsi-Catharios	2012	Kefalas & Castritsi-Catharios, 2012	Kefalas & Castritsi-Catharios, 2012	605315
150	Animalia	Porifera	Demospongiae	Suberitida	Stylocordylidae	Stylocordyla		pellita	(Topsent, 1904)	species	new	Stylocordyla pellita (Topsent, 1904)	Stylocordyla pellita	Topsent	1904	Topsent, 1904	(Topsent, 1904)	185002
151	Animalia	Porifera	Demospongiae	Suberitida	Suberitidae	Aaptos		aaptos	(Schmidt, 1864)	species	new	Aaptos aaptos (Schmidt, 1864)	Aaptos aaptos	Schmidt	1864	Schmidt, 1864	(Schmidt, 1864)	134241
152	Animalia	Porifera	Demospongiae	Suberitida	Suberitidae	Aaptos		papillata	(Keller, 1880)	species	new	Aaptos papillata (Keller, 1880)	Aaptos papillata	Keller	1880	Keller, 1880	(Keller, 1880)	134242
153	Animalia	Porifera	Demospongiae	Suberitida	Suberitidae	Protosuberites		denhartogi	van Soest & de Kluijver, 2003	species	orig	Protosuberites denhartogi van Soest & de Kluijver, 2003	Protosuberites denhartogi	van Soest & de Kluijver	2003	van Soest & de Kluijver, 2003	van Soest & de Kluijver, 2003	170782
154	Animalia	Porifera	Demospongiae	Suberitida	Suberitidae	Protosuberites		ectyoninus	(Topsent, 1900)	species	new	Protosuberites ectyoninus (Topsent, 1900)	Protosuberites ectyoninus	Topsent	1900	Topsent, 1900	(Topsent, 1900)	170784
155	Animalia	Porifera	Demospongiae	Suberitida	Suberitidae	Protosuberites		rugosus	(Topsent, 1893)	species	new	Protosuberites rugosus (Topsent, 1893)	Protosuberites rugosus	Topsent	1893	Topsent, 1893	(Topsent, 1893)	134254
156	Animalia	Porifera	Demospongiae	Suberitida	Suberitidae	Pseudosuberites		sulphureus	(Bowerbank, 1866)	species	new	Pseudosuberites sulphureus (Bowerbank, 1866)	Pseudosuberites sulphureus	Bowerbank	1866	Bowerbank, 1866	(Bowerbank, 1866)	134260
157	Animalia	Porifera	Demospongiae	Suberitida	Suberitidae	Rhizaxinella		pyrifera	(Delle Chiaje, 1828)	species	new	Rhizaxinella pyrifera (Delle Chiaje, 1828)	Rhizaxinella pyrifera	Delle Chiaje	1828	Delle Chiaje, 1828	(Delle Chiaje, 1828)	134266
158	Animalia	Porifera	Demospongiae	Suberitida	Suberitidae	Rhizaxinella		shikmonae	Ilan, Gugel, Galil & Janussen, 2003	species	orig	Rhizaxinella shikmonae Ilan, Gugel, Galil & Janussen, 2003	Rhizaxinella shikmonae	Ilan, Gugel, Galil & Janussen	2003	Ilan, Gugel, Galil & Janussen, 2003	Ilan, Gugel, Galil & Janussen, 2003	170830
159	Animalia	Porifera	Demospongiae	Suberitida	Suberitidae	Suberites		carnosus	(Johnston, 1842)	species	new	Suberites carnosus (Johnston, 1842)	Suberites carnosus	Johnston	1842	Johnston, 1842	(Johnston, 1842)	134275
160	Animalia	Porifera	Demospongiae	Suberitida	Suberitidae	Suberites		domuncula	(Olivi, 1792)	species	new	Suberites domuncula (Olivi, 1792)	Suberites domuncula	Olivi	1792	Olivi, 1792	(Olivi, 1792)	134282
161	Animalia	Porifera	Demospongiae	Suberitida	Suberitidae	Suberites		ficus	(Johnston, 1842)	species	new	Suberites ficus (Johnston, 1842)	Suberites ficus	Johnston	1842	Johnston, 1842	(Johnston, 1842)	134285
162	Animalia	Porifera	Demospongiae	Suberitida	Suberitidae	Suberites		massa	Nardo, 1847	species	orig	Suberites massa Nardo, 1847	Suberites massa	Nardo	1847	Nardo, 1847	Nardo, 1847	134296
163	Animalia	Porifera	Demospongiae	Suberitida	Suberitidae	Suberites		syringella	(Schmidt, 1868)	species	new	Suberites syringella (Schmidt, 1868)	Suberites syringella	Schmidt	1868	Schmidt, 1868	(Schmidt, 1868)	134304
164	Animalia	Porifera	Demospongiae	Suberitida	Suberitidae	Terpios		gelatinosa	(Bowerbank, 1866)	species	new	Terpios gelatinosa (Bowerbank, 1866)	Terpios gelatinosa	Bowerbank	1866	Bowerbank, 1866	(Bowerbank, 1866)	170892
165	Animalia	Porifera	Demospongiae	Tethyida	Hemiasterellidae	Hemiasterella		aristoteliana	Voultsiadou-Koukoura & van Soest, 1991	species	orig	Hemiasterella aristoteliana Voultsiadou-Koukoura & van Soest, 1991	Hemiasterella aristoteliana	Voultsiadou-Koukoura & van Soest	1991	Voultsiadou-Koukoura & van Soest, 1991	Voultsiadou-Koukoura & van Soest, 1991	134166
166	Animalia	Porifera	Demospongiae	Tethyida	Tethyidae	Tethya		aurantium	(Pallas, 1766)	species	new	Tethya aurantium (Pallas, 1766)	Tethya aurantium	Pallas	1766	Pallas, 1766	(Pallas, 1766)	134311
167	Animalia	Porifera	Demospongiae	Tethyida	Tethyidae	Tethya		citrina	Sarà & Melone, 1965	species	orig	Tethya citrina Sarà & Melone, 1965	Tethya citrina	Sarà & Melone	1965	Sarà & Melone, 1965	Sarà & Melone, 1965	134312
168	Animalia	Porifera	Demospongiae	Tethyida	Timeidae	Timea		chondrilloides	(Topsent, 1904)	species	new	Timea chondrilloides (Topsent, 1904)	Timea chondrilloides	Topsent	1904	Topsent, 1904	(Topsent, 1904)	134321
169	Animalia	Porifera	Demospongiae	Tethyida	Timeidae	Timea		geministellata	Pulitzer-Finali, 1978	species	orig	Timea geministellata Pulitzer-Finali, 1978	Timea geministellata	Pulitzer-Finali	1978	Pulitzer-Finali, 1978	Pulitzer-Finali, 1978	134325
170	Animalia	Porifera	Demospongiae	Tethyida	Timeidae	Timea		stellata	(Bowerbank, 1866)	species	new	Timea stellata (Bowerbank, 1866)	Timea stellata	Bowerbank	1866	Bowerbank, 1866	(Bowerbank, 1866)	134330
171	Animalia	Porifera	Demospongiae	Tethyida	Timeidae	Timea		stellifasciata	Sarà & Siribelli, 1960	species	orig	Timea stellifasciata Sarà & Siribelli, 1960	Timea stellifasciata	Sarà & Siribelli	1960	Sarà & Siribelli, 1960	Sarà & Siribelli, 1960	134331
172	Animalia	Porifera	Demospongiae	Tethyida	Timeidae	Timea		unistellata	(Topsent, 1892)	species	new	Timea unistellata (Topsent, 1892)	Timea unistellata	Topsent	1892	Topsent, 1892	(Topsent, 1892)	134335
173	Animalia	Porifera	Demospongiae	Tetractinellida	Ancorinidae	Dercitus	Stoeba	plicatus	(Schmidt, 1868)	species	new	Dercitus plicatus (Schmidt, 1868)	Dercitus plicatus	Schmidt	1868	Schmidt, 1868	(Schmidt, 1868)	134070
174	Animalia	Porifera	Demospongiae	Tetractinellida	Ancorinidae	Jaspis		johnstonii	(Schmidt, 1862)	species	new	Jaspis johnstonii (Schmidt, 1862)	Jaspis johnstonii	Schmidt	1862	Schmidt, 1862	(Schmidt, 1862)	134000
175	Animalia	Porifera	Demospongiae	Tetractinellida	Ancorinidae	Stelletta		dorsigera	Schmidt, 1864	species	orig	Stelletta dorsigera Schmidt, 1864	Stelletta dorsigera	Schmidt	1864	Schmidt, 1864	Schmidt, 1864	133972
176	Animalia	Porifera	Demospongiae	Tetractinellida	Ancorinidae	Stelletta		grubii	Schmidt, 1862	species	orig	Stelletta grubii Schmidt, 1862	Stelletta grubii	Schmidt	1862	Schmidt, 1862	Schmidt, 1862	133974
177	Animalia	Porifera	Demospongiae	Tetractinellida	Ancorinidae	Stelletta		hispida	(Buccich, 1886)	species	new	Stelletta hispida (Buccich, 1886)	Stelletta hispida	Buccich	1886	Buccich, 1886	(Buccich, 1886)	133976
178	Animalia	Porifera	Demospongiae	Tetractinellida	Ancorinidae	Stelletta		mediterranea	(Topsent, 1893)	species	new	Stelletta mediterranea (Topsent, 1893)	Stelletta mediterranea	Topsent	1893	Topsent, 1893	(Topsent, 1893)	133978
179	Animalia	Porifera	Demospongiae	Tetractinellida	Ancorinidae	Stelletta		stellata	Topsent, 1893	species	orig	Stelletta stellata Topsent, 1893	Stelletta stellata	Topsent	1893	Topsent, 1893	Topsent, 1893	133985
180	Animalia	Porifera	Demospongiae	Tetractinellida	Ancorinidae	Stryphnus	Stryphnus	mucronatus	(Schmidt, 1868)	species	new	Stryphnus mucronatus (Schmidt, 1868)	Stryphnus mucronatus	Schmidt	1868	Schmidt, 1868	(Schmidt, 1868)	133989
181	Animalia	Porifera	Demospongiae	Tetractinellida	Ancorinidae	Stryphnus	Stryphnus	ponderosus	(Bowerbank, 1866)	species	new	Stryphnus ponderosus (Bowerbank, 1866)	Stryphnus ponderosus	Bowerbank	1866	Bowerbank, 1866	(Bowerbank, 1866)	133991
182	Animalia	Porifera	Demospongiae	Tetractinellida	Azoricidae	Leiodermatium	Leiodermatium	lynceus	Schmidt, 1870	species	orig	Leiodermatium lynceus Schmidt, 1870	Leiodermatium lynceus	Schmidt	1870	Schmidt, 1870	Schmidt, 1870	134344
183	Animalia	Porifera	Demospongiae	Tetractinellida	Calthropellidae	Calthropella	Calthropella	pathologica	(Schmidt, 1868)	species	new	Calthropella pathologica (Schmidt, 1868)	Calthropella pathologica	Schmidt	1868	Schmidt, 1868	(Schmidt, 1868)	133950
184	Animalia	Porifera	Demospongiae	Tetractinellida	Calthropellidae	Calthropella	Corticellopsis	stelligera	(Schmidt, 1868)	species	new	Calthropella stelligera (Schmidt, 1868)	Calthropella stelligera	Schmidt	1868	Schmidt, 1868	(Schmidt, 1868)	133953
185	Animalia	Porifera	Demospongiae	Tetractinellida	Geodiidae	Erylus		discophorus	(Schmidt, 1862)	species	new	Erylus discophorus (Schmidt, 1862)	Erylus discophorus	Schmidt	1862	Schmidt, 1862	(Schmidt, 1862)	134011
186	Animalia	Porifera	Demospongiae	Tetractinellida	Geodiidae	Geodia		conchilega	Schmidt, 1862	species	orig	Geodia conchilega Schmidt, 1862	Geodia conchilega	Schmidt	1862	Schmidt, 1862	Schmidt, 1862	134024
187	Animalia	Porifera	Demospongiae	Tetractinellida	Geodiidae	Geodia		cydonium	(Jameson, 1811)	species	new	Geodia cydonium (Jameson, 1811)	Geodia cydonium	Jameson	1811	Jameson, 1811	(Jameson, 1811)	134025
188	Animalia	Porifera	Demospongiae	Tetractinellida	Geodiidae	Penares		euastrum	(Schmidt, 1868)	species	new	Penares euastrum (Schmidt, 1868)	Penares euastrum	Schmidt	1868	Schmidt, 1868	(Schmidt, 1868)	597207
189	Animalia	Porifera	Demospongiae	Tetractinellida	Geodiidae	Penares		helleri	(Schmidt, 1864)	species	new	Penares helleri (Schmidt, 1864)	Penares helleri	Schmidt	1864	Schmidt, 1864	(Schmidt, 1864)	133961
190	Animalia	Porifera	Demospongiae	Tetractinellida	Pachastrellidae	Pachastrella		monilifera	Schmidt, 1868	species	orig	Pachastrella monilifera Schmidt, 1868	Pachastrella monilifera	Schmidt	1868	Schmidt, 1868	Schmidt, 1868	134078
191	Animalia	Porifera	Demospongiae	Tetractinellida	Samidae	Samus		anonymus	Gray, 1867	species	orig	Samus anonymus Gray, 1867	Samus anonymus	Gray	1867	Gray, 1867	Gray, 1867	171271
192	Animalia	Porifera	Demospongiae	Tetractinellida	Tetillidae	Craniella		cranium	(Müller, 1776)	species	new	Craniella cranium (Müller, 1776)	Craniella cranium	Müller	1776	Müller, 1776	(Müller, 1776)	171330
193	Animalia	Porifera	Demospongiae	Tetractinellida	Theneidae	Thenea		muricata	(Bowerbank, 1858)	species	new	Thenea muricata (Bowerbank, 1858)	Thenea muricata	Bowerbank	1858	Bowerbank, 1858	(Bowerbank, 1858)	134106
194	Animalia	Porifera	Demospongiae	Tetractinellida	Theonellidae	Discodermia		polymorpha	Pisera & Vacelet, 2011	species	orig	Discodermia polymorpha Pisera & Vacelet, 2011	Discodermia polymorpha	Pisera & Vacelet	2011	Pisera & Vacelet, 2011	Pisera & Vacelet, 2011	558214
195	Animalia	Porifera	Demospongiae	Tetractinellida	Thoosidae	Alectona		millari	Carter, 1879	species	orig	Alectona millari Carter, 1879	Alectona millari	Carter	1879	Carter, 1879	Carter, 1879	134115
196	Animalia	Porifera	Demospongiae	Tetractinellida	Vulcanellidae	Poecillastra		compressa	(Bowerbank, 1866)	species	new	Poecillastra compressa (Bowerbank, 1866)	Poecillastra compressa	Bowerbank	1866	Bowerbank, 1866	(Bowerbank, 1866)	134083
197	Animalia	Porifera	Demospongiae	Tetractinellida	Vulcanellidae	Vulcanella		gracilis	(Sollas, 1888)	species	new	Vulcanella gracilis (Sollas, 1888)	Vulcanella gracilis	Sollas	1888	Sollas, 1888	(Sollas, 1888)	597279
198	Animalia	Porifera	Demospongiae	Verongiida	Aplysinidae	Aplysina		aerophoba	(Nardo, 1833)	species	new	Aplysina aerophoba (Nardo, 1833)	Aplysina aerophoba	Nardo	1833	Nardo, 1833	(Nardo, 1833)	133911
199	Animalia	Porifera	Demospongiae	Verongiida	Aplysinidae	Aplysina		cavernicola	(Vacelet, 1959)	species	new	Aplysina cavernicola (Vacelet, 1959)	Aplysina cavernicola	Vacelet	1959	Vacelet, 1959	(Vacelet, 1959)	133913
200	Animalia	Porifera	Demospongiae	Verongiida	Ianthellidae	Hexadella		pruvoti	Topsent, 1896	species	orig	Hexadella pruvoti Topsent, 1896	Hexadella pruvoti	Topsent	1896	Topsent, 1896	Topsent, 1896	169685
201	Animalia	Porifera	Demospongiae	Verongiida	Ianthellidae	Hexadella		racovitzai	Topsent, 1896	species	orig	Hexadella racovitzai Topsent, 1896	Hexadella racovitzai	Topsent	1896	Topsent, 1896	Topsent, 1896	132315
202	Animalia	Porifera	Hexactinellida	Lyssacinosida	Rossellidae	Sympagella		nux	Schmidt, 1870	species	orig	Sympagella nux Schmidt, 1870	Sympagella nux	Schmidt	1870	Schmidt, 1870	Schmidt, 1870	134399
203	Animalia	Porifera	Homoscleromorpha	Homosclerophorida	Oscarellidae	Oscarella		balibaloi	Pérez, Ivanisevic, Dubois, Pedel, Thomas, Tokina & Ereskovsky, 2011	species	orig	Oscarella balibaloi Pérez, Ivanisevic, Dubois, Pedel, Thomas, Tokina & Ereskovsky, 2011	Oscarella balibaloi	Pérez, Ivanisevic, Dubois, Pedel, Thomas, Tokina & Ereskovsky	2011	Pérez, Ivanisevic, Dubois, Pedel, Thomas, Tokina & Ereskovsky, 2011	Pérez, Ivanisevic, Dubois, Pedel, Thomas, Tokina & Ereskovsky, 2011	564911
204	Animalia	Porifera	Homoscleromorpha	Homosclerophorida	Oscarellidae	Oscarella		lobularis	(Schmidt, 1862)	species	new	Oscarella lobularis (Schmidt, 1862)	Oscarella lobularis	Schmidt	1862	Schmidt, 1862	(Schmidt, 1862)	133928
205	Animalia	Porifera	Homoscleromorpha	Homosclerophorida	Oscarellidae	Oscarella		microlobata	Muricy, Boury-Esnault, Bézac & Vacelet, 1996	species	orig	Oscarella microlobata Muricy, Boury-Esnault, Bézac & Vacelet, 1996	Oscarella microlobata	Muricy, Boury-Esnault, Bézac & Vacelet	1996	Muricy, Boury-Esnault, Bézac & Vacelet, 1996	Muricy, Boury-Esnault, Bézac & Vacelet, 1996	169719
206	Animalia	Porifera	Homoscleromorpha	Homosclerophorida	Oscarellidae	Oscarella		tuberculata	(Schmidt, 1868)	species	new	Oscarella tuberculata (Schmidt, 1868)	Oscarella tuberculata	Schmidt	1868	Schmidt, 1868	(Schmidt, 1868)	169724
207	Animalia	Porifera	Homoscleromorpha	Homosclerophorida	Oscarellidae	Pseudocorticium		jarrei	Boury-Esnault, Muricy, Gallissian & Vacelet, 1995	species	orig	Pseudocorticium jarrei Boury-Esnault, Muricy, Gallissian & Vacelet, 1995	Pseudocorticium jarrei	Boury-Esnault, Muricy, Gallissian & Vacelet	1995	Boury-Esnault, Muricy, Gallissian & Vacelet, 1995	Boury-Esnault, Muricy, Gallissian & Vacelet, 1995	133939
208	Animalia	Porifera	Homoscleromorpha	Homosclerophorida	Plakinidae	Corticium		candelabrum	Schmidt, 1862	species	orig	Corticium candelabrum Schmidt, 1862	Corticium candelabrum	Schmidt	1862	Schmidt, 1862	Schmidt, 1862	133921
209	Animalia	Porifera	Homoscleromorpha	Homosclerophorida	Plakinidae	Plakina		bowerbanki	(Sarà, 1960)	species	new	Plakina bowerbanki (Sarà, 1960)	Plakina bowerbanki	Sarà	1960	Sarà, 1960	(Sarà, 1960)	169733
210	Animalia	Porifera	Homoscleromorpha	Homosclerophorida	Plakinidae	Plakina		dilopha	Schulze, 1880	species	orig	Plakina dilopha Schulze, 1880	Plakina dilopha	Schulze	1880	Schulze, 1880	Schulze, 1880	133931
211	Animalia	Porifera	Homoscleromorpha	Homosclerophorida	Plakinidae	Plakina		monolopha	Schulze, 1880	species	orig	Plakina monolopha Schulze, 1880	Plakina monolopha	Schulze	1880	Schulze, 1880	Schulze, 1880	133932
212	Animalia	Porifera	Homoscleromorpha	Homosclerophorida	Plakinidae	Plakina		trilopha	Schulze, 1880	species	orig	Plakina trilopha Schulze, 1880	Plakina trilopha	Schulze	1880	Schulze, 1880	Schulze, 1880	133933
213	Animalia	Porifera	Homoscleromorpha	Homosclerophorida	Plakinidae	Plakina		weinbergi	Muricy, Boury-Esnault, Bézac & Vacelet, 1998	species	orig	Plakina weinbergi Muricy, Boury-Esnault, Bézac & Vacelet, 1998	Plakina weinbergi	Muricy, Boury-Esnault, Bézac & Vacelet	1998	Muricy, Boury-Esnault, Bézac & Vacelet, 1998	Muricy, Boury-Esnault, Bézac & Vacelet, 1998	169751
214	Animalia	Porifera	Homoscleromorpha	Homosclerophorida	Plakinidae	Plakinastrella		copiosa	Schulze, 1880	species	orig	Plakinastrella copiosa Schulze, 1880	Plakinastrella copiosa	Schulze	1880	Schulze, 1880	Schulze, 1880	133934
215	Animalia	Porifera	Homoscleromorpha	Homosclerophorida	Plakinidae	Plakortis		simplex	Schulze, 1880	species	orig	Plakortis simplex Schulze, 1880	Plakortis simplex	Schulze	1880	Schulze, 1880	Schulze, 1880	133938

## Sheet: ClassificationLists
Checklist of species of Porifera of Greece
Voultsiadou; Gerovasileiou; Bailly; 2016
Published in Biodiversity Data Journal
				SPECIES WITH SUBGENERA
3 different layouts for the list: the cells in BLACK are the ones to use; (the cells in grey are for computational steps).																																															Sorted alphabetically.
	CAREFUL: Usage of formulas. If you copy-paste in another worksheet, paste only the values!																	Text in grey character are to be ignored. This for the preparation of the lists in SpeciesLists and ClassificationLists.
You can use Taxon_Local_ID to link with the table taxa (in that case only species).
		Simple taxon list		1 col. Indented taxon list		Classification list with taxon # per rank									Additional info			List preparation																							Result of Match Taxa from WoRMS						For vlookup of AphiaID for WS SpeciesLists
						Kingdom	Phylum	Class	Order	Family	Genus	Subgenus	Species
Rank		TaxonName		TaxonNameInd		1	1	4	24	65	111	0	215		AphiaID in WoRMS	Authorship (WoRMS)		LineNo	Kingdom	Phylum	Class	Order	Family	Genus	Subgenus	Species	Authorship	Preparation fields													AphiaID	Match type	ScientificName	Authority	ctrlTaxon	crtlAuthorship
Kingdom		Animalia		Animalia		Animalia									2				Animalia									1	1	0	0	0	0	0	0	0		1	Kingdom		2	exact	Animalia		TRUE		Aaptos	132064
Phylum		Porifera		Porifera			Porifera								558	Grant, 1836			Animalia	Porifera								2	1	1	0	0	0	0	0	0		2	Phylum		558	exact	Porifera	Grant, 1836	TRUE		Aaptos aaptos	134241
Class		Calcarea		Calcarea				Calcarea							559	Bowerbank, 1862			Animalia	Porifera	Calcarea							3	1	1	1	0	0	0	0	0		3	Class		559	exact	Calcarea	Bowerbank, 1862	TRUE		Aaptos papillata	134242
Order		Baerida		Baerida					Baerida						164161	Borojevic, Boury-Esnault & Vacelet, 2000			Animalia	Porifera	Calcarea	Baerida						4	1	1	1	1	0	0	0	0		4	Order		164161	exact	Baerida	Borojevic, Boury-Esnault & Vacelet, 2000	TRUE		Acanthella	165648
Family		Petrobionidae		Petrobionidae						Petrobionidae					164642	Borojevic, 1979			Animalia	Porifera	Calcarea	Baerida	Petrobionidae					5	1	1	1	1	1	0	0	0		5	Family		164642	exact	Petrobionidae	Borojevic, 1979	TRUE		Acanthella acuta	132455
Genus		Petrobiona		Petrobiona							Petrobiona				164643	Vacelet & Lévi, 1958			Animalia	Porifera	Calcarea	Baerida	Petrobionidae	Petrobiona				6	1	1	1	1	1	1	0	0		6	Genus		164643	exact	Petrobiona	Vacelet & Lévi, 1958	TRUE		Agelas	131771
Species		Petrobiona massiliana		Petrobiona massiliana									Petrobiona massiliana		164644	Vacelet & Lévi, 1958		1	Animalia	Porifera	Calcarea	Baerida	Petrobionidae	Petrobiona		massiliana	Vacelet & Lévi, 1958	8	1	1	1	1	1	1	0	2		7	Subgenus		164644	exact	Petrobiona massiliana	Vacelet & Lévi, 1958	TRUE	TRUE	Agelas oroides	132454
Order		Clathrinida		Clathrinida					Clathrinida						131593	Hartman, 1958			Animalia	Porifera	Calcarea	Clathrinida						4	1	1	1	1	0	0	0	0		8	Species		131593	exact	Clathrinida	Hartman, 1958	TRUE		Agelasida	164813
Family		Clathrinidae		Clathrinidae						Clathrinidae					131619	Minchin, 1900			Animalia	Porifera	Calcarea	Clathrinida	Clathrinidae					5	1	1	1	1	1	0	0	0		9	Species		131619	exact	Clathrinidae	Minchin, 1900	TRUE		Agelasidae	131628
Genus		Clathrina		Clathrina							Clathrina				131729	Gray, 1867			Animalia	Porifera	Calcarea	Clathrinida	Clathrinidae	Clathrina				6	1	1	1	1	1	1	0	0					131729	exact	Clathrina	Gray, 1867	TRUE		Alectona	132025
Species		Clathrina blanca		Clathrina blanca									Clathrina blanca		233970	(Miklucho-Maclay, 1868)		2	Animalia	Porifera	Calcarea	Clathrinida	Clathrinidae	Clathrina		blanca	(Miklucho-Maclay, 1868)	8	1	1	1	1	1	1	0	2					233970	exact	Clathrina blanca	(Miklucho-Maclay, 1868)	TRUE	TRUE	Alectona millari	134115
Species		Clathrina clathrus		Clathrina clathrus									Clathrina clathrus		132275	(Schmidt, 1864)		3	Animalia	Porifera	Calcarea	Clathrinida	Clathrinidae	Clathrina		clathrus	(Schmidt, 1864)	8	1	1	1	1	1	1	0	2					132275	exact	Clathrina clathrus	(Schmidt, 1864)	TRUE	TRUE	Ancorinidae	131662
Family		Leucettidae		Leucettidae						Leucettidae					164745	de Laubenfels, 1936			Animalia	Porifera	Calcarea	Clathrinida	Leucettidae					5	1	1	1	1	1	0	0	0					164745	exact	Leucettidae	de Laubenfels, 1936	TRUE		Animalia	2
Genus		Leucetta		Leucetta							Leucetta				131731	Haeckel, 1872			Animalia	Porifera	Calcarea	Clathrinida	Leucettidae	Leucetta				6	1	1	1	1	1	1	0	0					131731	exact	Leucetta	Haeckel, 1872	TRUE		Antho	131865
Species		Leucetta solida		Leucetta solida									Leucetta solida		132286	(Schmidt, 1862)		4	Animalia	Porifera	Calcarea	Clathrinida	Leucettidae	Leucetta		solida	(Schmidt, 1862)	8	1	1	1	1	1	1	0	2					132286	exact	Leucetta solida	(Schmidt, 1862)	TRUE	TRUE	Antho	131865
Order		Leucosolenida		Leucosolenida					Leucosolenida						131591	Hartman, 1958			Animalia	Porifera	Calcarea	Leucosolenida						4	1	1	1	1	0	0	0	0					131591	exact	Leucosolenida	Hartman, 1958	TRUE		Antho (Antho) involvens	167886
Family		Grantiidae		Grantiidae						Grantiidae					131614	Dendy, 1893			Animalia	Porifera	Calcarea	Leucosolenida	Grantiidae					5	1	1	1	1	1	0	0	0					131614	exact	Grantiidae	Dendy, 1893	TRUE		Aplysilla	131738
Genus		Leucandra		Leucandra							Leucandra				131704	Haeckel, 1872			Animalia	Porifera	Calcarea	Leucosolenida	Grantiidae	Leucandra				6	1	1	1	1	1	1	0	0					131704	exact	Leucandra	Haeckel, 1872	TRUE		Aplysilla rosea	132296
Species		Leucandra nausicaae		Leucandra nausicaae									Leucandra nausicaae		164353	(Schuffner, 1877)		5	Animalia	Porifera	Calcarea	Leucosolenida	Grantiidae	Leucandra		nausicaae	(Schuffner, 1877)	8	1	1	1	1	1	1	0	2					164353	exact	Leucandra nausicaae	(Schuffner, 1877)	TRUE	TRUE	Aplysina	131975
Family		Sycettidae		Sycettidae						Sycettidae					131617	Dendy, 1893			Animalia	Porifera	Calcarea	Leucosolenida	Sycettidae					5	1	1	1	1	1	0	0	0					131617	exact	Sycettidae	Dendy, 1893	TRUE		Aplysina aerophoba	133911
Genus		Sycon		Sycon							Sycon				131723	Risso, 1827			Animalia	Porifera	Calcarea	Leucosolenida	Sycettidae	Sycon				6	1	1	1	1	1	1	0	0					131723	exact	Sycon	Risso, 1827	TRUE		Aplysina cavernicola	133913
Species		Sycon elegans		Sycon elegans									Sycon elegans		132252	(Bowerbank, 1845)		6	Animalia	Porifera	Calcarea	Leucosolenida	Sycettidae	Sycon		elegans	(Bowerbank, 1845)	8	1	1	1	1	1	1	0	2					132252	exact	Sycon elegans	(Bowerbank, 1845)	TRUE	TRUE	Aplysinidae	131660
Species		Sycon faulkneri		Sycon faulkneri									Sycon faulkneri		164577	Ilan, Gugel, Galil & Janussen, 2003		7	Animalia	Porifera	Calcarea	Leucosolenida	Sycettidae	Sycon		faulkneri	Ilan, Gugel, Galil & Janussen, 2003	8	1	1	1	1	1	1	0	2					164577	exact	Sycon faulkneri	Ilan, Gugel, Galil & Janussen, 2003	TRUE	TRUE	Axinella	131774
Species		Sycon raphanus		Sycon raphanus									Sycon raphanus		132257	Schmidt, 1862		8	Animalia	Porifera	Calcarea	Leucosolenida	Sycettidae	Sycon		raphanus	Schmidt, 1862	8	1	1	1	1	1	1	0	2					132257	exact	Sycon raphanus	Schmidt, 1862	TRUE	TRUE	Axinella cannabina	132470
Class		Demospongiae		Demospongiae				Demospongiae							164811	Sollas, 1885			Animalia	Porifera	Demospongiae							3	1	1	1	0	0	0	0	0					164811	exact	Demospongiae	Sollas, 1885	TRUE		Axinella damicornis	132472
Order		Agelasida		Agelasida					Agelasida						164813	Hartman, 1980			Animalia	Porifera	Demospongiae	Agelasida						4	1	1	1	1	0	0	0	0					164813	exact	Agelasida	Hartman, 1980	TRUE		Axinella polypoides	132487
Family		Agelasidae		Agelasidae						Agelasidae					131628	Verrill, 1907			Animalia	Porifera	Demospongiae	Agelasida	Agelasidae					5	1	1	1	1	1	0	0	0					131628	exact	Agelasidae	Verrill, 1907	TRUE		Axinella verrucosa	132499
Genus		Agelas		Agelas							Agelas				131771	Duchassaing & Michelotti, 1864			Animalia	Porifera	Demospongiae	Agelasida	Agelasidae	Agelas				6	1	1	1	1	1	1	0	0					131771	exact	Agelas	Duchassaing & Michelotti, 1864	TRUE		Axinellida	163084
Species		Agelas oroides		Agelas oroides									Agelas oroides		132454	(Schmidt, 1864)		9	Animalia	Porifera	Demospongiae	Agelasida	Agelasidae	Agelas		oroides	(Schmidt, 1864)	8	1	1	1	1	1	1	0	2					132454	exact	Agelas oroides	(Schmidt, 1864)	TRUE	TRUE	Axinellidae	131629
Family		Hymerhabdiidae		Hymerhabdiidae						Hymerhabdiidae					598619	Morrow, Picton, Erpenbeck, Boury-Esnault, Maggs & Allcock, 2012			Animalia	Porifera	Demospongiae	Agelasida	Hymerhabdiidae					5	1	1	1	1	1	0	0	0					598619	exact	Hymerhabdiidae	Morrow, Picton, Erpenbeck, Boury-Esnault, Maggs & Allcock, 2012	TRUE		Axinyssa	131802
Genus		Hymerhabdia		Hymerhabdia							Hymerhabdia				131785	Topsent, 1892			Animalia	Porifera	Demospongiae	Agelasida	Hymerhabdiidae	Hymerhabdia				6	1	1	1	1	1	1	0	0					131785	exact	Hymerhabdia	Topsent, 1892	TRUE		Axinyssa aurantiaca	165741
Species		Hymerhabdia intermedia		Hymerhabdia intermedia									Hymerhabdia intermedia		132524	Sarà & Siribelli, 1960		10	Animalia	Porifera	Demospongiae	Agelasida	Hymerhabdiidae	Hymerhabdia		intermedia	Sarà & Siribelli, 1960	8	1	1	1	1	1	1	0	2					132524	exact	Hymerhabdia intermedia	Sarà & Siribelli, 1960	TRUE	TRUE	Axinyssa michaelis	255156
Genus		Prosuberites		Prosuberites							Prosuberites				132068	Topsent, 1893			Animalia	Porifera	Demospongiae	Agelasida	Hymerhabdiidae	Prosuberites				6	1	1	1	1	1	1	0	0					132068	exact	Prosuberites	Topsent, 1893	TRUE		Azoricidae	171053
Species		Prosuberites longispinus		Prosuberites longispinus									Prosuberites longispinus		134252	Topsent, 1893		11	Animalia	Porifera	Demospongiae	Agelasida	Hymerhabdiidae	Prosuberites		longispinus	Topsent, 1893	8	1	1	1	1	1	1	0	2					134252	exact	Prosuberites longispinus	Topsent, 1893	TRUE	TRUE	Baerida	164161
Order		Axinellida		Axinellida					Axinellida						163084	Lévi, 1953			Animalia	Porifera	Demospongiae	Axinellida						4	1	1	1	1	0	0	0	0					163084	exact	Axinellida	Lévi, 1953	TRUE		Bubarida	845473
Family		Axinellidae		Axinellidae						Axinellidae					131629	Carter, 1875			Animalia	Porifera	Demospongiae	Axinellida	Axinellidae					5	1	1	1	1	1	0	0	0					131629	exact	Axinellidae	Carter, 1875	TRUE		Cacospongia	131762
Genus		Axinella		Axinella							Axinella				131774	Schmidt, 1862			Animalia	Porifera	Demospongiae	Axinellida	Axinellidae	Axinella				6	1	1	1	1	1	1	0	0					131774	exact	Axinella	Schmidt, 1862	TRUE		Cacospongia mollior	132439
Species		Axinella cannabina		Axinella cannabina									Axinella cannabina		132470	(Esper, 1794)		12	Animalia	Porifera	Demospongiae	Axinellida	Axinellidae	Axinella		cannabina	(Esper, 1794)	8	1	1	1	1	1	1	0	2					132470	exact	Axinella cannabina	(Esper, 1794)	TRUE	TRUE	Calcarea	559
Species		Axinella damicornis		Axinella damicornis									Axinella damicornis		132472	(Esper, 1794)		13	Animalia	Porifera	Demospongiae	Axinellida	Axinellidae	Axinella		damicornis	(Esper, 1794)	8	1	1	1	1	1	1	0	2					132472	exact	Axinella damicornis	(Esper, 1794)	TRUE	TRUE	Callyspongia	131825
Species		Axinella polypoides		Axinella polypoides									Axinella polypoides		132487	Schmidt, 1862		14	Animalia	Porifera	Demospongiae	Axinellida	Axinellidae	Axinella		polypoides	Schmidt, 1862	8	1	1	1	1	1	1	0	2					132487	exact	Axinella polypoides	Schmidt, 1862	TRUE	TRUE	Callyspongia septimaniensis	132742
Species		Axinella verrucosa		Axinella verrucosa									Axinella verrucosa		132499	(Esper, 1794)		15	Animalia	Porifera	Demospongiae	Axinellida	Axinellidae	Axinella		verrucosa	(Esper, 1794)	8	1	1	1	1	1	1	0	2					132499	exact	Axinella verrucosa	(Esper, 1794)	TRUE	TRUE	Callyspongiidae	131635
Family		Heteroxyidae		Heteroxyidae						Heteroxyidae					165967	Dendy, 1905			Animalia	Porifera	Demospongiae	Axinellida	Heteroxyidae					5	1	1	1	1	1	0	0	0					165967	exact	Heteroxyidae	Dendy, 1905	TRUE		Calthropella	131987
Genus		Didiscus		Didiscus							Didiscus				131789	Dendy, 1922			Animalia	Porifera	Demospongiae	Axinellida	Heteroxyidae	Didiscus				6	1	1	1	1	1	1	0	0					131789	exact	Didiscus	Dendy, 1922	TRUE		Calthropella	131987
Species		Didiscus stylifer		Didiscus stylifer									Didiscus stylifer		165978	Tsurnamal, 1969		16	Animalia	Porifera	Demospongiae	Axinellida	Heteroxyidae	Didiscus		stylifer	Tsurnamal, 1969	8	1	1	1	1	1	1	0	2					165978	exact	Didiscus stylifer	Tsurnamal, 1969	TRUE	TRUE	Calthropella	131987
Genus		Myrmekioderma		Myrmekioderma							Myrmekioderma				131794	Ehlers, 1870			Animalia	Porifera	Demospongiae	Axinellida	Heteroxyidae	Myrmekioderma				6	1	1	1	1	1	1	0	0					131794	exact	Myrmekioderma	Ehlers, 1870	TRUE		Calthropella (Calthropella) pathologica	555800
Species		Myrmekioderma spelaeum		Myrmekioderma spelaeum									Myrmekioderma spelaeum		166024	(Pulitzer-Finali, 1983)		17	Animalia	Porifera	Demospongiae	Axinellida	Heteroxyidae	Myrmekioderma		spelaeum	(Pulitzer-Finali, 1983)	8	1	1	1	1	1	1	0	2					166024	exact	Myrmekioderma spelaeum	(Pulitzer-Finali, 1983)	TRUE	TRUE	Calthropella (Corticellopsis) stelligera	555820
Family		Raspailiidae		Raspailiidae						Raspailiidae					131642	Nardo, 1833			Animalia	Porifera	Demospongiae	Axinellida	Raspailiidae					5	1	1	1	1	1	0	0	0					131642	exact	Raspailiidae	Nardo, 1833	TRUE		Calthropellidae	170035
Genus		Eurypon		Eurypon							Eurypon				131882	Gray, 1867			Animalia	Porifera	Demospongiae	Axinellida	Raspailiidae	Eurypon				6	1	1	1	1	1	1	0	0					131882	exact	Eurypon	Gray, 1867	TRUE		Calyx	131851
Species		Eurypon cinctum		Eurypon cinctum									Eurypon cinctum		133106	Sarà, 1960		18	Animalia	Porifera	Demospongiae	Axinellida	Raspailiidae	Eurypon		cinctum	Sarà, 1960	8	1	1	1	1	1	1	0	2					133106	exact	Eurypon cinctum	Sarà, 1960	TRUE	TRUE	Calyx nicaeensis	166932
Species		Eurypon clavatum		Eurypon clavatum									Eurypon clavatum		133107	(Bowerbank, 1866)		19	Animalia	Porifera	Demospongiae	Axinellida	Raspailiidae	Eurypon		clavatum	(Bowerbank, 1866)	8	1	1	1	1	1	1	0	2					133107	exact	Eurypon clavatum	(Bowerbank, 1866)	TRUE	TRUE	Chalinidae	131636
Species		Eurypon coronula		Eurypon coronula									Eurypon coronula		133108	(Bowerbank, 1874)		20	Animalia	Porifera	Demospongiae	Axinellida	Raspailiidae	Eurypon		coronula	(Bowerbank, 1874)	8	1	1	1	1	1	1	0	2					133108	exact	Eurypon coronula	(Bowerbank, 1874)	TRUE	TRUE	Chondrilla	132021
Species		Eurypon major		Eurypon major									Eurypon major		133115	Sarà & Siribelli, 1960		21	Animalia	Porifera	Demospongiae	Axinellida	Raspailiidae	Eurypon		major	Sarà & Siribelli, 1960	8	1	1	1	1	1	1	0	2					133115	exact	Eurypon major	Sarà & Siribelli, 1960	TRUE	TRUE	Chondrilla nucula	134110
Genus		Raspaciona		Raspaciona							Raspaciona				131887	Topsent, 1936			Animalia	Porifera	Demospongiae	Axinellida	Raspailiidae	Raspaciona				6	1	1	1	1	1	1	0	0					131887	exact	Raspaciona	Topsent, 1936	TRUE		Chondrillida	736910
Species		Raspaciona aculeata		Raspaciona aculeata									Raspaciona aculeata		133139	(Johnston, 1842)		22	Animalia	Porifera	Demospongiae	Axinellida	Raspailiidae	Raspaciona		aculeata	(Johnston, 1842)	8	1	1	1	1	1	1	0	2					133139	exact	Raspaciona aculeata	(Johnston, 1842)	TRUE	TRUE	Chondrillidae	131668
Genus		Raspailia		Raspailia							Raspailia				131888	Nardo, 1833			Animalia	Porifera	Demospongiae	Axinellida	Raspailiidae	Raspailia				6	1	1	1	1	1	1	0	0					131888	exact	Raspailia	Nardo, 1833	TRUE		Chondrosia	132022
Subgenus		Raspailia		Raspailia											131888	Nardo, 1833			Animalia	Porifera	Demospongiae	Axinellida	Raspailiidae	Raspailia	Raspailia			7	1	1	1	1	1	1	1	0					131888	exact	Raspailia	Nardo, 1833	TRUE		Chondrosia reniformis	134112
Species		Raspailia viminalis		Raspailia viminalis									Raspailia (Raspailia) viminalis		133154	Schmidt, 1862		23	Animalia	Porifera	Demospongiae	Axinellida	Raspailiidae	Raspailia		viminalis	Schmidt, 1862	8	1	1	1	1	1	1	0	2					133154	exact	Raspailia (Raspailia) viminalis	Schmidt, 1862	FALSE	TRUE	Chondrosiida	845324
Family		Stelligeridae		Stelligeridae						Stelligeridae					607948	Lendenfeld, 1898			Animalia	Porifera	Demospongiae	Axinellida	Stelligeridae					5	1	1	1	1	1	0	0	0					607948	exact	Stelligeridae	Lendenfeld, 1898	TRUE		Chondrosiidae	817913
Genus		Paratimea		Paratimea							Paratimea				132036	Hallmann, 1917			Animalia	Porifera	Demospongiae	Axinellida	Stelligeridae	Paratimea				6	1	1	1	1	1	1	0	0					132036	exact	Paratimea	Hallmann, 1917	TRUE		Clathria	131868
Species		Paratimea pierantonii		Paratimea pierantonii									Paratimea pierantonii		134171	(Sarà, 1958)		24	Animalia	Porifera	Demospongiae	Axinellida	Stelligeridae	Paratimea		pierantonii	(Sarà, 1958)	8	1	1	1	1	1	1	0	2					134171	exact	Paratimea pierantonii	(Sarà, 1958)	TRUE	TRUE	Clathria	131868
Genus		Stelligera		Stelligera							Stelligera				132037	Gray, 1867			Animalia	Porifera	Demospongiae	Axinellida	Stelligeridae	Stelligera				6	1	1	1	1	1	1	0	0					132037	exact	Stelligera	Gray, 1867	TRUE		Clathria	131868
Species		Stelligera stuposa		Stelligera stuposa									Stelligera stuposa		134175	(Ellis & Solander, 1786)		25	Animalia	Porifera	Demospongiae	Axinellida	Stelligeridae	Stelligera		stuposa	(Ellis & Solander, 1786)	8	1	1	1	1	1	1	0	2					134175	exact	Stelligera stuposa	(Ellis & Solander, 1786)	TRUE	TRUE	Clathria	131868
Order		Bubarida		Bubarida					Bubarida						845473	Morrow & Cárdenas, 2015			Animalia	Porifera	Demospongiae	Bubarida						4	1	1	1	1	0	0	0	0					845473	exact	Bubarida	Morrow & Cárdenas, 2015	TRUE		Clathria (Clathria) toxistricta	167582
Family		Dictyonellidae		Dictyonellidae						Dictyonellidae					131632	van Soest, Diaz & Pomponi, 1990			Animalia	Porifera	Demospongiae	Bubarida	Dictyonellidae					5	1	1	1	1	1	0	0	0					131632	exact	Dictyonellidae	van Soest, Diaz & Pomponi, 1990	TRUE		Clathria (Clathria) toxistyla	167697
Genus		Acanthella		Acanthella							Acanthella				165648	Schmidt, 1862			Animalia	Porifera	Demospongiae	Bubarida	Dictyonellidae	Acanthella				6	1	1	1	1	1	1	0	0					165648	exact	Acanthella	Schmidt, 1862	TRUE		Clathria (Clathria) toxivaria	408856
Species		Acanthella acuta		Acanthella acuta									Acanthella acuta		132455	Schmidt, 1862		26	Animalia	Porifera	Demospongiae	Bubarida	Dictyonellidae	Acanthella		acuta	Schmidt, 1862	8	1	1	1	1	1	1	0	2					132455	exact	Acanthella acuta	Schmidt, 1862	TRUE	TRUE	Clathria (Microciona) cleistochela	167628
Genus		Dictyonella		Dictyonella							Dictyonella				131796	Schmidt, 1868			Animalia	Porifera	Demospongiae	Bubarida	Dictyonellidae	Dictyonella				6	1	1	1	1	1	1	0	0					131796	exact	Dictyonella	Schmidt, 1868	TRUE		Clathria (Microciona) gradalis	167642
Species		Dictyonella incisa		Dictyonella incisa									Dictyonella incisa		132550	(Schmidt, 1880)		27	Animalia	Porifera	Demospongiae	Bubarida	Dictyonellidae	Dictyonella		incisa	(Schmidt, 1880)	8	1	1	1	1	1	1	0	2					132550	exact	Dictyonella incisa	(Schmidt, 1880)	TRUE	TRUE	Clathria (Thalysias) jolicoeuri	167744
Species		Dictyonella marsilii		Dictyonella marsilii									Dictyonella marsilii		132552	(Topsent, 1893)		28	Animalia	Porifera	Demospongiae	Bubarida	Dictyonellidae	Dictyonella		marsilii	(Topsent, 1893)	8	1	1	1	1	1	1	0	2					132552	exact	Dictyonella marsilii	(Topsent, 1893)	TRUE	TRUE	Clathrina	131729
Species		Dictyonella obtusa		Dictyonella obtusa									Dictyonella obtusa		132553	(Schmidt, 1862)		29	Animalia	Porifera	Demospongiae	Bubarida	Dictyonellidae	Dictyonella		obtusa	(Schmidt, 1862)	8	1	1	1	1	1	1	0	2					132553	exact	Dictyonella obtusa	(Schmidt, 1862)	TRUE	TRUE	Clathrina blanca	233970
Species		Dictyonella plicata		Dictyonella plicata									Dictyonella plicata		132555	(Schmidt, 1880)		30	Animalia	Porifera	Demospongiae	Bubarida	Dictyonellidae	Dictyonella		plicata	(Schmidt, 1880)	8	1	1	1	1	1	1	0	2					132555	exact	Dictyonella plicata	(Schmidt, 1880)	TRUE	TRUE	Clathrina clathrus	132275
Order		Chondrillida		Chondrillida					Chondrillida						736910	Redmond, Morrow, Thacker, Diaz, Boury-Esnault, Cardenas, Hajdu, Lobo-Hajdu, Picton, Pomponi, Kayal & Collins, 2013			Animalia	Porifera	Demospongiae	Chondrillida						4	1	1	1	1	0	0	0	0					736910	exact	Chondrillida	Redmond, Morrow, Thacker, Diaz, Boury-Esnault, Cardenas, Hajdu, Lobo-Hajdu, Picton, Pomponi, Kayal & Collins, 2013	TRUE		Clathrinida	131593
Family		Chondrillidae		Chondrillidae						Chondrillidae					131668	Gray, 1872			Animalia	Porifera	Demospongiae	Chondrillida	Chondrillidae					5	1	1	1	1	1	0	0	0					131668	exact	Chondrillidae	Gray, 1872	TRUE		Clathrinidae	131619
Genus		Chondrilla		Chondrilla							Chondrilla				132021	Schmidt, 1862			Animalia	Porifera	Demospongiae	Chondrillida	Chondrillidae	Chondrilla				6	1	1	1	1	1	1	0	0					132021	exact	Chondrilla	Schmidt, 1862	TRUE		Cliona	132026
Species		Chondrilla nucula		Chondrilla nucula									Chondrilla nucula		134110	Schmidt, 1862		31	Animalia	Porifera	Demospongiae	Chondrillida	Chondrillidae	Chondrilla		nucula	Schmidt, 1862	8	1	1	1	1	1	1	0	2					134110	exact	Chondrilla nucula	Schmidt, 1862	TRUE	TRUE	Cliona celata	134121
Genus		Thymosiopsis		Thymosiopsis							Thymosiopsis				132024	Vacelet & Perez, 1998			Animalia	Porifera	Demospongiae	Chondrillida	Chondrillidae	Thymosiopsis				6	1	1	1	1	1	1	0	0					132024	exact	Thymosiopsis	Vacelet & Perez, 1998	TRUE		Cliona parenzani	170466
Species		Thymosiopsis cuticulatus		Thymosiopsis cuticulatus									Thymosiopsis cuticulatus		134114	Vacelet & Perez, 1998		32	Animalia	Porifera	Demospongiae	Chondrillida	Chondrillidae	Thymosiopsis		cuticulatus	Vacelet & Perez, 1998	8	1	1	1	1	1	1	0	2					134114	exact	Thymosiopsis cuticulatus	Vacelet & Perez, 1998	TRUE	TRUE	Cliona rhodensis	134136
Family		Halisarcidae		Halisarcidae						Halisarcidae					131634	Schmidt, 1862			Animalia	Porifera	Demospongiae	Chondrillida	Halisarcidae					5	1	1	1	1	1	0	0	0					131634	exact	Halisarcidae	Schmidt, 1862	TRUE		Cliona schmidtii	134139
Genus		Halisarca		Halisarca							Halisarca				131822	Johnston, 1842			Animalia	Porifera	Demospongiae	Chondrillida	Halisarcidae	Halisarca				6	1	1	1	1	1	1	0	0					131822	exact	Halisarca	Johnston, 1842	TRUE		Cliona thoosina	170479
Species		Halisarca dujardinii		Halisarca dujardinii									Halisarca dujardinii		132736	Johnston, 1842		33	Animalia	Porifera	Demospongiae	Chondrillida	Halisarcidae	Halisarca		dujardinii	Johnston, 1842	8	1	1	1	1	1	1	0	2					132736	exact	Halisarca dujardinii	Johnston, 1842	TRUE	TRUE	Cliona viridis	134146
Order		Chondrosiida		Chondrosiida					Chondrosiida						845324	Boury-Esnault & Lopes, 1985			Animalia	Porifera	Demospongiae	Chondrosiida						4	1	1	1	1	0	0	0	0					845324	exact	Chondrosiida	Boury-Esnault & Lopes, 1985	TRUE		Clionaida	845506
Family		Chondrosiidae		Chondrosiidae						Chondrosiidae					817913	Schulze, 1877			Animalia	Porifera	Demospongiae	Chondrosiida	Chondrosiidae					5	1	1	1	1	1	0	0	0					817913	exact	Chondrosiidae	Schulze, 1877	TRUE		Clionaidae	170417
Genus		Chondrosia		Chondrosia							Chondrosia				132022	Nardo, 1847			Animalia	Porifera	Demospongiae	Chondrosiida	Chondrosiidae	Chondrosia				6	1	1	1	1	1	1	0	0					132022	exact	Chondrosia	Nardo, 1847	TRUE		Coelosphaeridae	131650
Species		Chondrosia reniformis		Chondrosia reniformis									Chondrosia reniformis		134112	Nardo, 1847		34	Animalia	Porifera	Demospongiae	Chondrosiida	Chondrosiidae	Chondrosia		reniformis	Nardo, 1847	8	1	1	1	1	1	1	0	2					134112	exact	Chondrosia reniformis	Nardo, 1847	TRUE	TRUE	Corticium	131976
Order		Clionaida		Clionaida					Clionaida						845506	Morrow & Cárdenas, 2015			Animalia	Porifera	Demospongiae	Clionaida						4	1	1	1	1	0	0	0	0					845506	exact	Clionaida	Morrow & Cárdenas, 2015	TRUE		Corticium candelabrum	133921
Family		Clionaidae		Clionaidae						Clionaidae					170417	d'Orbigny, 1851			Animalia	Porifera	Demospongiae	Clionaida	Clionaidae					5	1	1	1	1	1	0	0	0					170417	exact	Clionaidae	d'Orbigny, 1851	TRUE		Coscinoderma	131754
Genus		Cliona		Cliona							Cliona				132026	Grant, 1826			Animalia	Porifera	Demospongiae	Clionaida	Clionaidae	Cliona				6	1	1	1	1	1	1	0	0					132026	exact	Cliona	Grant, 1826	TRUE		Coscinoderma sporadense	132375
Species		Cliona celata		Cliona celata									Cliona celata		134121	Grant, 1826		35	Animalia	Porifera	Demospongiae	Clionaida	Clionaidae	Cliona		celata	Grant, 1826	8	1	1	1	1	1	1	0	2					134121	exact	Cliona celata	Grant, 1826	TRUE	TRUE	Crambe	131931
Species		Cliona parenzani		Cliona parenzani									Cliona parenzani		170466	Corriero & Scalera-Liaci, 1997		36	Animalia	Porifera	Demospongiae	Clionaida	Clionaidae	Cliona		parenzani	Corriero & Scalera-Liaci, 1997	8	1	1	1	1	1	1	0	2					170466	exact	Cliona parenzani	Corriero & Scalera-Liaci, 1997	TRUE	TRUE	Crambe crambe	133445
Species		Cliona rhodensis		Cliona rhodensis									Cliona rhodensis		134136	Rützler & Bromley, 1981		37	Animalia	Porifera	Demospongiae	Clionaida	Clionaidae	Cliona		rhodensis	Rützler & Bromley, 1981	8	1	1	1	1	1	1	0	2					134136	exact	Cliona rhodensis	Rützler & Bromley, 1981	TRUE	TRUE	Crambeidae	131651
Species		Cliona schmidtii		Cliona schmidtii									Cliona schmidtii		134139	(Ridley, 1881)		38	Animalia	Porifera	Demospongiae	Clionaida	Clionaidae	Cliona		schmidtii	(Ridley, 1881)	8	1	1	1	1	1	1	0	2					134139	exact	Cliona schmidtii	(Ridley, 1881)	TRUE	TRUE	Craniella	132093
Species		Cliona thoosina		Cliona thoosina									Cliona thoosina		170479	Topsent, 1888		39	Animalia	Porifera	Demospongiae	Clionaida	Clionaidae	Cliona		thoosina	Topsent, 1888	8	1	1	1	1	1	1	0	2					170479	exact	Cliona thoosina	Topsent, 1888	TRUE	TRUE	Craniella cranium	171330
Species		Cliona viridis		Cliona viridis									Cliona viridis		134146	(Schmidt, 1862)		40	Animalia	Porifera	Demospongiae	Clionaida	Clionaidae	Cliona		viridis	(Schmidt, 1862)	8	1	1	1	1	1	1	0	2					134146	exact	Cliona viridis	(Schmidt, 1862)	TRUE	TRUE	Crella	131936
Genus		Spiroxya		Spiroxya							Spiroxya				132061	Topsent, 1896			Animalia	Porifera	Demospongiae	Clionaida	Clionaidae	Spiroxya				6	1	1	1	1	1	1	0	0					132061	exact	Spiroxya	Topsent, 1896	TRUE		Crella	131936
Species		Spiroxya heteroclita		Spiroxya heteroclita									Spiroxya heteroclita		134238	Topsent, 1896		41	Animalia	Porifera	Demospongiae	Clionaida	Clionaidae	Spiroxya		heteroclita	Topsent, 1896	8	1	1	1	1	1	1	0	2					134238	exact	Spiroxya heteroclita	Topsent, 1896	TRUE	TRUE	Crella (Pytheas) fusifera	169069
Family		Spirastrellidae		Spirastrellidae						Spirastrellidae					131674	Ridley & Dendy, 1886			Animalia	Porifera	Demospongiae	Clionaida	Spirastrellidae					5	1	1	1	1	1	0	0	0					131674	exact	Spirastrellidae	Ridley & Dendy, 1886	TRUE		Crella (Pytheas) sigmata	246130
Genus		Diplastrella		Diplastrella							Diplastrella				132078	Topsent, 1918			Animalia	Porifera	Demospongiae	Clionaida	Spirastrellidae	Diplastrella				6	1	1	1	1	1	1	0	0					132078	exact	Diplastrella	Topsent, 1918	TRUE		Crellidae	131652
Species		Diplastrella bistellata		Diplastrella bistellata									Diplastrella bistellata		134317	(Schmidt, 1862)		42	Animalia	Porifera	Demospongiae	Clionaida	Spirastrellidae	Diplastrella		bistellata	(Schmidt, 1862)	8	1	1	1	1	1	1	0	2					134317	exact	Diplastrella bistellata	(Schmidt, 1862)	TRUE	TRUE	Darwinellidae	131623
Species		Diplastrella ornata		Diplastrella ornata									Diplastrella ornata		134318	Rützler & Sarà, 1962		43	Animalia	Porifera	Demospongiae	Clionaida	Spirastrellidae	Diplastrella		ornata	Rützler & Sarà, 1962	8	1	1	1	1	1	1	0	2					134318	exact	Diplastrella ornata	Rützler & Sarà, 1962	TRUE	TRUE	Demospongiae	164811
Genus		Spirastrella		Spirastrella							Spirastrella				132060	Schmidt, 1868			Animalia	Porifera	Demospongiae	Clionaida	Spirastrellidae	Spirastrella				6	1	1	1	1	1	1	0	0					132060	exact	Spirastrella	Schmidt, 1868	TRUE		Dendrilla	131741
Species		Spirastrella cunctatrix		Spirastrella cunctatrix									Spirastrella cunctatrix		134235	Schmidt, 1868		44	Animalia	Porifera	Demospongiae	Clionaida	Spirastrellidae	Spirastrella		cunctatrix	Schmidt, 1868	8	1	1	1	1	1	1	0	2					134235	exact	Spirastrella cunctatrix	Schmidt, 1868	TRUE	TRUE	Dendrilla acantha	132312
Order		Dendroceratida		Dendroceratida					Dendroceratida						131594	Minchin, 1900			Animalia	Porifera	Demospongiae	Dendroceratida						4	1	1	1	1	0	0	0	0					131594	exact	Dendroceratida	Minchin, 1900	TRUE		Dendroceratida	131594
Family		Darwinellidae		Darwinellidae						Darwinellidae					131623	Merejkowsky, 1879			Animalia	Porifera	Demospongiae	Dendroceratida	Darwinellidae					5	1	1	1	1	1	0	0	0					131623	exact	Darwinellidae	Merejkowsky, 1879	TRUE		Dendroxea	131833
Genus		Aplysilla		Aplysilla							Aplysilla				131738	Schulze, 1878			Animalia	Porifera	Demospongiae	Dendroceratida	Darwinellidae	Aplysilla				6	1	1	1	1	1	1	0	0					131738	exact	Aplysilla	Schulze, 1878	TRUE		Dendroxea lenis	132768
Species		Aplysilla rosea		Aplysilla rosea									Aplysilla rosea		132296	(Barrois, 1876)		45	Animalia	Porifera	Demospongiae	Dendroceratida	Darwinellidae	Aplysilla		rosea	(Barrois, 1876)	8	1	1	1	1	1	1	0	2					132296	exact	Aplysilla rosea	(Barrois, 1876)	TRUE	TRUE	Dercitus	132013
Genus		Dendrilla		Dendrilla							Dendrilla				131741	Lendenfeld, 1883			Animalia	Porifera	Demospongiae	Dendroceratida	Darwinellidae	Dendrilla				6	1	1	1	1	1	1	0	0					131741	exact	Dendrilla	Lendenfeld, 1883	TRUE		Dercitus	132013
Species		Dendrilla acantha		Dendrilla acantha									Dendrilla acantha		132312	Vacelet, 1958		46	Animalia	Porifera	Demospongiae	Dendroceratida	Darwinellidae	Dendrilla		acantha	Vacelet, 1958	8	1	1	1	1	1	1	0	2					132312	exact	Dendrilla acantha	Vacelet, 1958	TRUE	TRUE	Dercitus (Stoeba) plicatus	555693
Family		Dictyodendrillidae		Dictyodendrillidae						Dictyodendrillidae					164886	Bergquist, 1980			Animalia	Porifera	Demospongiae	Dendroceratida	Dictyodendrillidae					5	1	1	1	1	1	0	0	0					164886	exact	Dictyodendrillidae	Bergquist, 1980	TRUE		Desmacella	131898
Genus		Spongionella		Spongionella							Spongionella				131748	Bowerbank, 1862			Animalia	Porifera	Demospongiae	Dendroceratida	Dictyodendrillidae	Spongionella				6	1	1	1	1	1	1	0	0					131748	exact	Spongionella	Bowerbank, 1862	TRUE		Desmacella annexa	133206
Species		Spongionella pulchella		Spongionella pulchella									Spongionella pulchella		132335	(Sowerby, 1804)		47	Animalia	Porifera	Demospongiae	Dendroceratida	Dictyodendrillidae	Spongionella		pulchella	(Sowerby, 1804)	8	1	1	1	1	1	1	0	2					132335	exact	Spongionella pulchella	(Sowerby, 1804)	TRUE	TRUE	Desmacella inornata	133213
Order		Desmacellida		Desmacellida					Desmacellida						845474	Morrow & Cárdenas, 2015			Animalia	Porifera	Demospongiae	Desmacellida						4	1	1	1	1	0	0	0	0					845474	exact	Desmacellida	Morrow & Cárdenas, 2015	TRUE		Desmacellida	845474
Family		Desmacellidae		Desmacellidae						Desmacellidae					131645	Ridley & Dendy, 1886			Animalia	Porifera	Demospongiae	Desmacellida	Desmacellidae					5	1	1	1	1	1	0	0	0					131645	exact	Desmacellidae	Ridley & Dendy, 1886	TRUE		Desmacellidae	131645
Genus		Desmacella		Desmacella							Desmacella				131898	Schmidt, 1870			Animalia	Porifera	Demospongiae	Desmacellida	Desmacellidae	Desmacella				6	1	1	1	1	1	1	0	0					131898	exact	Desmacella	Schmidt, 1870	TRUE		Dictyoceratida	131595
Species		Desmacella annexa		Desmacella annexa									Desmacella annexa		133206	Schmidt, 1870		48	Animalia	Porifera	Demospongiae	Desmacellida	Desmacellidae	Desmacella		annexa	Schmidt, 1870	8	1	1	1	1	1	1	0	2					133206	exact	Desmacella annexa	Schmidt, 1870	TRUE	TRUE	Dictyodendrillidae	164886
Species		Desmacella inornata		Desmacella inornata									Desmacella inornata		133213	(Bowerbank, 1866)		49	Animalia	Porifera	Demospongiae	Desmacellida	Desmacellidae	Desmacella		inornata	(Bowerbank, 1866)	8	1	1	1	1	1	1	0	2					133213	exact	Desmacella inornata	(Bowerbank, 1866)	TRUE	TRUE	Dictyonella	131796
Order		Dictyoceratida		Dictyoceratida					Dictyoceratida						131595	Minchin, 1900			Animalia	Porifera	Demospongiae	Dictyoceratida						4	1	1	1	1	0	0	0	0					131595	exact	Dictyoceratida	Minchin, 1900	TRUE		Dictyonella incisa	132550
Family		Dysideidae		Dysideidae						Dysideidae					131624	Gray, 1867			Animalia	Porifera	Demospongiae	Dictyoceratida	Dysideidae					5	1	1	1	1	1	0	0	0					131624	exact	Dysideidae	Gray, 1867	TRUE		Dictyonella marsilii	132552
Genus		Dysidea		Dysidea							Dysidea				131745	Johnston, 1842			Animalia	Porifera	Demospongiae	Dictyoceratida	Dysideidae	Dysidea				6	1	1	1	1	1	1	0	0					131745	exact	Dysidea	Johnston, 1842	TRUE		Dictyonella obtusa	132553
Species		Dysidea avara		Dysidea avara									Dysidea avara		132321	(Schmidt, 1862)		50	Animalia	Porifera	Demospongiae	Dictyoceratida	Dysideidae	Dysidea		avara	(Schmidt, 1862)	8	1	1	1	1	1	1	0	2					132321	exact	Dysidea avara	(Schmidt, 1862)	TRUE	TRUE	Dictyonella plicata	132555
Species		Dysidea fragilis		Dysidea fragilis									Dysidea fragilis		132324	(Montagu, 1814)		51	Animalia	Porifera	Demospongiae	Dictyoceratida	Dysideidae	Dysidea		fragilis	(Montagu, 1814)	8	1	1	1	1	1	1	0	2					132324	exact	Dysidea fragilis	(Montagu, 1814)	TRUE	TRUE	Dictyonellidae	131632
Species		Dysidea incrustans		Dysidea incrustans									Dysidea incrustans		132325	(Schmidt, 1862)		52	Animalia	Porifera	Demospongiae	Dictyoceratida	Dysideidae	Dysidea		incrustans	(Schmidt, 1862)	8	1	1	1	1	1	1	0	2					132325	exact	Dysidea incrustans	(Schmidt, 1862)	TRUE	TRUE	Didiscus	131789
Species		Dysidea tupha		Dysidea tupha									Dysidea tupha		184496	(Martens, 1824)		53	Animalia	Porifera	Demospongiae	Dictyoceratida	Dysideidae	Dysidea		tupha	(Martens, 1824)	8	1	1	1	1	1	1	0	2					184496	exact	Dysidea tupha	(Martens, 1824)	TRUE	TRUE	Didiscus stylifer	165978
Genus		Pleraplysilla		Pleraplysilla							Pleraplysilla				131743	Topsent, 1905			Animalia	Porifera	Demospongiae	Dictyoceratida	Dysideidae	Pleraplysilla				6	1	1	1	1	1	1	0	0					131743	exact	Pleraplysilla	Topsent, 1905	TRUE		Diplastrella	132078
Species		Pleraplysilla spinifera		Pleraplysilla spinifera									Pleraplysilla spinifera		132317	(Schulze, 1879)		54	Animalia	Porifera	Demospongiae	Dictyoceratida	Dysideidae	Pleraplysilla		spinifera	(Schulze, 1879)	8	1	1	1	1	1	1	0	2					132317	exact	Pleraplysilla spinifera	(Schulze, 1879)	TRUE	TRUE	Diplastrella bistellata	134317
Family		Irciniidae		Irciniidae						Irciniidae					131625	Gray, 1867			Animalia	Porifera	Demospongiae	Dictyoceratida	Irciniidae					5	1	1	1	1	1	0	0	0					131625	exact	Irciniidae	Gray, 1867	TRUE		Diplastrella ornata	134318
Genus		Ircinia		Ircinia							Ircinia				131751	Nardo, 1833			Animalia	Porifera	Demospongiae	Dictyoceratida	Irciniidae	Ircinia				6	1	1	1	1	1	1	0	0					131751	exact	Ircinia	Nardo, 1833	TRUE		Discodermia	132089
Species		Ircinia dendroides		Ircinia dendroides									Ircinia dendroides		132349	(Schmidt, 1862)		55	Animalia	Porifera	Demospongiae	Dictyoceratida	Irciniidae	Ircinia		dendroides	(Schmidt, 1862)	8	1	1	1	1	1	1	0	2					132349	exact	Ircinia dendroides	(Schmidt, 1862)	TRUE	TRUE	Discodermia polymorpha	558214
Species		Ircinia oros		Ircinia oros									Ircinia oros		132356	(Schmidt, 1864)		56	Animalia	Porifera	Demospongiae	Dictyoceratida	Irciniidae	Ircinia		oros	(Schmidt, 1864)	8	1	1	1	1	1	1	0	2					132356	exact	Ircinia oros	(Schmidt, 1864)	TRUE	TRUE	Dysidea	131745
Species		Ircinia paucifilamentosa		Ircinia paucifilamentosa									Ircinia paucifilamentosa		132357	Vacelet, 1961		57	Animalia	Porifera	Demospongiae	Dictyoceratida	Irciniidae	Ircinia		paucifilamentosa	Vacelet, 1961	8	1	1	1	1	1	1	0	2					132357	exact	Ircinia paucifilamentosa	Vacelet, 1961	TRUE	TRUE	Dysidea avara	132321
Species		Ircinia retidermata		Ircinia retidermata									Ircinia retidermata		132360	Pulitzer-Finali & Pronzato, 1981		58	Animalia	Porifera	Demospongiae	Dictyoceratida	Irciniidae	Ircinia		retidermata	Pulitzer-Finali & Pronzato, 1981	8	1	1	1	1	1	1	0	2					132360	exact	Ircinia retidermata	Pulitzer-Finali & Pronzato, 1981	TRUE	TRUE	Dysidea fragilis	132324
Species		Ircinia variabilis		Ircinia variabilis									Ircinia variabilis		132362	(Schmidt, 1862)		59	Animalia	Porifera	Demospongiae	Dictyoceratida	Irciniidae	Ircinia		variabilis	(Schmidt, 1862)	8	1	1	1	1	1	1	0	2					132362	exact	Ircinia variabilis	(Schmidt, 1862)	TRUE	TRUE	Dysidea incrustans	132325
Species		Ircinia vestibulata		Ircinia vestibulata									Ircinia vestibulata		447737	(Szymanski, 1904)		60	Animalia	Porifera	Demospongiae	Dictyoceratida	Irciniidae	Ircinia		vestibulata	(Szymanski, 1904)	8	1	1	1	1	1	1	0	2					447737	exact	Ircinia vestibulata	(Szymanski, 1904)	TRUE	TRUE	Dysidea tupha	184496
Genus		Sarcotragus		Sarcotragus							Sarcotragus				131753	Schmidt, 1862			Animalia	Porifera	Demospongiae	Dictyoceratida	Irciniidae	Sarcotragus				6	1	1	1	1	1	1	0	0					131753	exact	Sarcotragus	Schmidt, 1862	TRUE		Dysideidae	131624
Species		Sarcotragus foetidus		Sarcotragus foetidus									Sarcotragus foetidus		132371	Schmidt, 1862		61	Animalia	Porifera	Demospongiae	Dictyoceratida	Irciniidae	Sarcotragus		foetidus	Schmidt, 1862	8	1	1	1	1	1	1	0	2					132371	exact	Sarcotragus foetidus	Schmidt, 1862	TRUE	TRUE	Echinoclathria	167906
Species		Sarcotragus pipetta		Sarcotragus pipetta									Sarcotragus pipetta		165085	(Schmidt, 1868)		62	Animalia	Porifera	Demospongiae	Dictyoceratida	Irciniidae	Sarcotragus		pipetta	(Schmidt, 1868)	8	1	1	1	1	1	1	0	2					165085	exact	Sarcotragus pipetta	(Schmidt, 1868)	TRUE	TRUE	Echinoclathria translata	167932
Species		Sarcotragus spinosulus		Sarcotragus spinosulus									Sarcotragus spinosulus		165086	Schmidt, 1862		63	Animalia	Porifera	Demospongiae	Dictyoceratida	Irciniidae	Sarcotragus		spinosulus	Schmidt, 1862	8	1	1	1	1	1	1	0	2					165086	exact	Sarcotragus spinosulus	Schmidt, 1862	TRUE	TRUE	Ephydatia	167141
Family		Spongiidae		Spongiidae						Spongiidae					131626	Gray, 1867			Animalia	Porifera	Demospongiae	Dictyoceratida	Spongiidae					5	1	1	1	1	1	0	0	0					131626	exact	Spongiidae	Gray, 1867	TRUE		Ephydatia fluviatilis	167144
Genus		Coscinoderma		Coscinoderma							Coscinoderma				131754	Carter, 1883			Animalia	Porifera	Demospongiae	Dictyoceratida	Spongiidae	Coscinoderma				6	1	1	1	1	1	1	0	0					131754	exact	Coscinoderma	Carter, 1883	TRUE		Erylus	132004
Species		Coscinoderma sporadense		Coscinoderma sporadense									Coscinoderma sporadense		132375	Voultsiadou-Koukoura, van Soest & Koukouras, 1991		64	Animalia	Porifera	Demospongiae	Dictyoceratida	Spongiidae	Coscinoderma		sporadense	Voultsiadou-Koukoura, van Soest & Koukouras, 1991	8	1	1	1	1	1	1	0	2					132375	exact	Coscinoderma sporadense	Voultsiadou-Koukoura, van Soest & Koukouras, 1991	TRUE	TRUE	Erylus discophorus	134011
Genus		Hippospongia		Hippospongia							Hippospongia				131757	Schulze, 1879			Animalia	Porifera	Demospongiae	Dictyoceratida	Spongiidae	Hippospongia				6	1	1	1	1	1	1	0	0					131757	exact	Hippospongia	Schulze, 1879	TRUE		Esperiopsidae	168337
Species		Hippospongia communis		Hippospongia communis									Hippospongia communis		132377	(Lamarck, 1814)		65	Animalia	Porifera	Demospongiae	Dictyoceratida	Spongiidae	Hippospongia		communis	(Lamarck, 1814)	8	1	1	1	1	1	1	0	2					132377	exact	Hippospongia communis	(Lamarck, 1814)	TRUE	TRUE	Eunapius	167154
Genus		Spongia		Spongia							Spongia				131759	Linnaeus, 1759			Animalia	Porifera	Demospongiae	Dictyoceratida	Spongiidae	Spongia				6	1	1	1	1	1	1	0	0					131759	exact	Spongia	Linnaeus, 1759	TRUE		Eunapius carteri	167156
Subgenus		Spongia		Spongia											131759	Linnaeus, 1759			Animalia	Porifera	Demospongiae	Dictyoceratida	Spongiidae	Spongia	Spongia			7	1	1	1	1	1	1	1	0					131759	exact	Spongia	Linnaeus, 1759	TRUE		Eurypon	131882
Species		Spongia lamella		Spongia lamella									Spongia (Spongia) lamella		266969	(Schulze, 1879)		66	Animalia	Porifera	Demospongiae	Dictyoceratida	Spongiidae	Spongia		lamella	(Schulze, 1879)	8	1	1	1	1	1	1	0	2					266969	exact	Spongia (Spongia) lamella	(Schulze, 1879)	FALSE	TRUE	Eurypon cinctum	133106
Species		Spongia nitens		Spongia nitens									Spongia (Spongia) nitens		165216	(Schmidt, 1862)		67	Animalia	Porifera	Demospongiae	Dictyoceratida	Spongiidae	Spongia		nitens	(Schmidt, 1862)	8	1	1	1	1	1	1	0	2					165216	exact	Spongia (Spongia) nitens	(Schmidt, 1862)	FALSE	TRUE	Eurypon clavatum	133107
Species		Spongia officinalis		Spongia officinalis									Spongia (Spongia) officinalis		165220	Linnaeus, 1759		68	Animalia	Porifera	Demospongiae	Dictyoceratida	Spongiidae	Spongia		officinalis	Linnaeus, 1759	8	1	1	1	1	1	1	0	2					165220	exact	Spongia (Spongia) officinalis	Linnaeus, 1759	FALSE	TRUE	Eurypon coronula	133108
Species		Spongia virgultosa		Spongia virgultosa									Spongia (Spongia) virgultosa		165250	(Schmidt, 1868)		69	Animalia	Porifera	Demospongiae	Dictyoceratida	Spongiidae	Spongia		virgultosa	(Schmidt, 1868)	8	1	1	1	1	1	1	0	2					165250	exact	Spongia (Spongia) virgultosa	(Schmidt, 1868)	FALSE	TRUE	Eurypon major	133115
Species		Spongia zimocca		Spongia zimocca									Spongia (Spongia) zimocca		165251	Schmidt, 1862		70	Animalia	Porifera	Demospongiae	Dictyoceratida	Spongiidae	Spongia		zimocca	Schmidt, 1862	8	1	1	1	1	1	1	0	2					165251	exact	Spongia (Spongia) zimocca	Schmidt, 1862	FALSE	TRUE	Fasciospongia	131764
Family		Thorectidae		Thorectidae						Thorectidae					131627	Bergquist, 1978			Animalia	Porifera	Demospongiae	Dictyoceratida	Thorectidae					5	1	1	1	1	1	0	0	0					131627	exact	Thorectidae	Bergquist, 1978	TRUE		Fasciospongia cavernosa	132444
Genus		Cacospongia		Cacospongia							Cacospongia				131762	Schmidt, 1862			Animalia	Porifera	Demospongiae	Dictyoceratida	Thorectidae	Cacospongia				6	1	1	1	1	1	1	0	0					131762	exact	Cacospongia	Schmidt, 1862	TRUE		Forcepia	131921
Species		Cacospongia mollior		Cacospongia mollior									Cacospongia mollior		132439	Schmidt, 1862		71	Animalia	Porifera	Demospongiae	Dictyoceratida	Thorectidae	Cacospongia		mollior	Schmidt, 1862	8	1	1	1	1	1	1	0	2					132439	exact	Cacospongia mollior	Schmidt, 1862	TRUE	TRUE	Forcepia	131921
Genus		Fasciospongia		Fasciospongia							Fasciospongia				131764	Burton, 1934			Animalia	Porifera	Demospongiae	Dictyoceratida	Thorectidae	Fasciospongia				6	1	1	1	1	1	1	0	0					131764	exact	Fasciospongia	Burton, 1934	TRUE		Forcepia (Leptolabis) luciensis	168891
Species		Fasciospongia cavernosa		Fasciospongia cavernosa									Fasciospongia cavernosa		132444	(Schmidt, 1862)		72	Animalia	Porifera	Demospongiae	Dictyoceratida	Thorectidae	Fasciospongia		cavernosa	(Schmidt, 1862)	8	1	1	1	1	1	1	0	2					132444	exact	Fasciospongia cavernosa	(Schmidt, 1862)	TRUE	TRUE	Geodia	132005
Genus		Hyrtios		Hyrtios							Hyrtios				131767	Duchassaing & Michelotti, 1864			Animalia	Porifera	Demospongiae	Dictyoceratida	Thorectidae	Hyrtios				6	1	1	1	1	1	1	0	0					131767	exact	Hyrtios	Duchassaing & Michelotti, 1864	TRUE		Geodia conchilega	134024
Species		Hyrtios collectrix		Hyrtios collectrix									Hyrtios collectrix		132448	(Schulze, 1880)		73	Animalia	Porifera	Demospongiae	Dictyoceratida	Thorectidae	Hyrtios		collectrix	(Schulze, 1880)	8	1	1	1	1	1	1	0	2					132448	exact	Hyrtios collectrix	(Schulze, 1880)	TRUE	TRUE	Geodia cydonium	134025
Genus		Scalarispongia		Scalarispongia							Scalarispongia				165370	Cook & Bergquist, 2000			Animalia	Porifera	Demospongiae	Dictyoceratida	Thorectidae	Scalarispongia				6	1	1	1	1	1	1	0	0					165370	exact	Scalarispongia	Cook & Bergquist, 2000	TRUE		Geodiidae	131664
Species		Scalarispongia scalaris		Scalarispongia scalaris									Scalarispongia scalaris		165376	(Schmidt, 1862)		74	Animalia	Porifera	Demospongiae	Dictyoceratida	Thorectidae	Scalarispongia		scalaris	(Schmidt, 1862)	8	1	1	1	1	1	1	0	2					165376	exact	Scalarispongia scalaris	(Schmidt, 1862)	TRUE	TRUE	Grantiidae	131614
Order		Haplosclerida		Haplosclerida					Haplosclerida						131598	Topsent, 1928			Animalia	Porifera	Demospongiae	Haplosclerida						4	1	1	1	1	0	0	0	0					131598	exact	Haplosclerida	Topsent, 1928	TRUE		Halichondria	131807
Family		Callyspongiidae		Callyspongiidae						Callyspongiidae					131635	de Laubenfels, 1936			Animalia	Porifera	Demospongiae	Haplosclerida	Callyspongiidae					5	1	1	1	1	1	0	0	0					131635	exact	Callyspongiidae	de Laubenfels, 1936	TRUE		Halichondria	131807
Genus		Callyspongia		Callyspongia							Callyspongia				131825	Duchassaing & Michelotti, 1864			Animalia	Porifera	Demospongiae	Haplosclerida	Callyspongiidae	Callyspongia				6	1	1	1	1	1	1	0	0					131825	exact	Callyspongia	Duchassaing & Michelotti, 1864	TRUE		Halichondria (Halichondria) contorta	165809
Species		Callyspongia septimaniensis		Callyspongia septimaniensis									Callyspongia septimaniensis		132742	Griessinger, 1971		75	Animalia	Porifera	Demospongiae	Haplosclerida	Callyspongiidae	Callyspongia		septimaniensis	Griessinger, 1971	8	1	1	1	1	1	1	0	2					132742	exact	Callyspongia septimaniensis	Griessinger, 1971	TRUE	TRUE	Halichondria (Halichondria) panicea	165853
Genus		Siphonochalina		Siphonochalina							Siphonochalina				131827	Schmidt, 1868			Animalia	Porifera	Demospongiae	Haplosclerida	Callyspongiidae	Siphonochalina				6	1	1	1	1	1	1	0	0					131827	exact	Siphonochalina	Schmidt, 1868	TRUE		Halichondriidae	131633
Species		Siphonochalina expansa		Siphonochalina expansa									Siphonochalina expansa		132747	Sarà, 1960		76	Animalia	Porifera	Demospongiae	Haplosclerida	Callyspongiidae	Siphonochalina		expansa	Sarà, 1960	8	1	1	1	1	1	1	0	2					132747	exact	Siphonochalina expansa	Sarà, 1960	TRUE	TRUE	Haliclona	131834
Family		Chalinidae		Chalinidae						Chalinidae					131636	Gray, 1867			Animalia	Porifera	Demospongiae	Haplosclerida	Chalinidae					5	1	1	1	1	1	0	0	0					131636	exact	Chalinidae	Gray, 1867	TRUE		Haliclona	131834
Genus		Dendroxea		Dendroxea							Dendroxea				131833	Griessinger, 1971			Animalia	Porifera	Demospongiae	Haplosclerida	Chalinidae	Dendroxea				6	1	1	1	1	1	1	0	0					131833	exact	Dendroxea	Griessinger, 1971	TRUE		Haliclona	131834
Species		Dendroxea lenis		Dendroxea lenis									Dendroxea lenis		132768	(Topsent, 1892)		77	Animalia	Porifera	Demospongiae	Haplosclerida	Chalinidae	Dendroxea		lenis	(Topsent, 1892)	8	1	1	1	1	1	1	0	2					132768	exact	Dendroxea lenis	(Topsent, 1892)	TRUE	TRUE	Haliclona	131834
Genus		Haliclona		Haliclona							Haliclona				131834	Grant, 1836			Animalia	Porifera	Demospongiae	Haplosclerida	Chalinidae	Haliclona				6	1	1	1	1	1	1	0	0					131834	exact	Haliclona	Grant, 1836	TRUE		Haliclona	131834
Subgenus		Gellius		Gellius											131834	Grant, 1836			Animalia	Porifera	Demospongiae	Haplosclerida	Chalinidae	Haliclona	Gellius			7	1	1	1	1	1	1	1	0					131834	exact	Haliclona	Grant, 1836	FALSE		Haliclona	131834
Species		Haliclona dubia		Haliclona dubia									Haliclona (Gellius) dubia		132795	(Babic, 1922)		78	Animalia	Porifera	Demospongiae	Haplosclerida	Chalinidae	Haliclona		dubia	(Babic, 1922)	8	1	1	1	1	1	1	0	2					132795	exact	Haliclona (Gellius) dubia	(Babic, 1922)	FALSE	TRUE	Haliclona	131834
Species		Haliclona fibulata		Haliclona fibulata									Haliclona (Gellius) fibulata		132796	(Schmidt, 1862)		79	Animalia	Porifera	Demospongiae	Haplosclerida	Chalinidae	Haliclona		fibulata	(Schmidt, 1862)	8	1	1	1	1	1	1	0	2					132796	exact	Haliclona (Gellius) fibulata	(Schmidt, 1862)	FALSE	TRUE	Haliclona (Gellius) dubia	132795
Species		Haliclona microsigma		Haliclona microsigma									Haliclona (Gellius) microsigma		132824	(Babic, 1922)		80	Animalia	Porifera	Demospongiae	Haplosclerida	Chalinidae	Haliclona		microsigma	(Babic, 1922)	8	1	1	1	1	1	1	0	2					132824	exact	Haliclona (Gellius) microsigma	(Babic, 1922)	FALSE	TRUE	Haliclona (Gellius) fibulata	132796
Subgenus		Halichoclona		Halichoclona											131834	Grant, 1836			Animalia	Porifera	Demospongiae	Haplosclerida	Chalinidae	Haliclona	Halichoclona			7	1	1	1	1	1	1	1	0					131834	exact	Haliclona	Grant, 1836	FALSE		Haliclona (Gellius) microsigma	132824
Species		Haliclona fulva		Haliclona fulva									Haliclona (Halichoclona) fulva		132802	(Topsent, 1893)		81	Animalia	Porifera	Demospongiae	Haplosclerida	Chalinidae	Haliclona		fulva	(Topsent, 1893)	8	1	1	1	1	1	1	0	2					132802	exact	Haliclona (Halichoclona) fulva	(Topsent, 1893)	FALSE	TRUE	Haliclona (Halichoclona) fulva	132802
Species		Haliclona perlucida		Haliclona perlucida									Haliclona (Halichoclona) perlucida		132840	(Griessinger, 1971)		82	Animalia	Porifera	Demospongiae	Haplosclerida	Chalinidae	Haliclona		perlucida	(Griessinger, 1971)	8	1	1	1	1	1	1	0	2					132840	exact	Haliclona (Halichoclona) perlucida	(Griessinger, 1971)	FALSE	TRUE	Haliclona (Halichoclona) perlucida	132840
Subgenus		Haliclona		Haliclona											131834	Grant, 1836			Animalia	Porifera	Demospongiae	Haplosclerida	Chalinidae	Haliclona	Haliclona			7	1	1	1	1	1	1	1	0					131834	exact	Haliclona	Grant, 1836	TRUE		Haliclona (Haliclona) simulans	132858
Species		Haliclona simulans		Haliclona simulans									Haliclona (Haliclona) simulans		132858	(Johnston, 1842)		83	Animalia	Porifera	Demospongiae	Haplosclerida	Chalinidae	Haliclona		simulans	(Johnston, 1842)	8	1	1	1	1	1	1	0	2					132858	exact	Haliclona (Haliclona) simulans	(Johnston, 1842)	FALSE	TRUE	Haliclona (Reniera) aquaeductus	132775
Subgenus		Reniera		Reniera											131834	Grant, 1836			Animalia	Porifera	Demospongiae	Haplosclerida	Chalinidae	Haliclona	Reniera			7	1	1	1	1	1	1	1	0					131834	exact	Haliclona	Grant, 1836	FALSE		Haliclona (Reniera) cinerea	166605
Species		Haliclona aquaeductus		Haliclona aquaeductus									Haliclona (Reniera) aquaeductus		132775	(Schmidt, 1862)		84	Animalia	Porifera	Demospongiae	Haplosclerida	Chalinidae	Haliclona		aquaeductus	(Schmidt, 1862)	8	1	1	1	1	1	1	0	2					132775	exact	Haliclona (Reniera) aquaeductus	(Schmidt, 1862)	FALSE	TRUE	Haliclona (Reniera) cratera	132789
Species		Haliclona cinerea		Haliclona cinerea									Haliclona (Reniera) cinerea		166605	(Grant, 1826)		85	Animalia	Porifera	Demospongiae	Haplosclerida	Chalinidae	Haliclona		cinerea	(Grant, 1826)	8	1	1	1	1	1	1	0	2					166605	exact	Haliclona (Reniera) cinerea	(Grant, 1826)	FALSE	TRUE	Haliclona (Reniera) mediterranea	166616
Species		Haliclona cratera		Haliclona cratera									Haliclona (Reniera) cratera		132789	(Schmidt, 1862)		86	Animalia	Porifera	Demospongiae	Haplosclerida	Chalinidae	Haliclona		cratera	(Schmidt, 1862)	8	1	1	1	1	1	1	0	2					132789	exact	Haliclona (Reniera) cratera	(Schmidt, 1862)	FALSE	TRUE	Haliclona (Reniera) subtilis	166625
Species		Haliclona mediterranea		Haliclona mediterranea									Haliclona (Reniera) mediterranea		166616	Griessinger, 1971		87	Animalia	Porifera	Demospongiae	Haplosclerida	Chalinidae	Haliclona		mediterranea	Griessinger, 1971	8	1	1	1	1	1	1	0	2					166616	exact	Haliclona (Reniera) mediterranea	Griessinger, 1971	FALSE	TRUE	Haliclona (Rhizoniera) rhizophora	166636
Species		Haliclona subtilis		Haliclona subtilis									Haliclona (Reniera) subtilis		166625	Griessinger, 1971		88	Animalia	Porifera	Demospongiae	Haplosclerida	Chalinidae	Haliclona		subtilis	Griessinger, 1971	8	1	1	1	1	1	1	0	2					166625	exact	Haliclona (Reniera) subtilis	Griessinger, 1971	FALSE	TRUE	Haliclona (Rhizoniera) sarai	244433
Subgenus		Rhizoniera		Rhizoniera											131834	Grant, 1836			Animalia	Porifera	Demospongiae	Haplosclerida	Chalinidae	Haliclona	Rhizoniera			7	1	1	1	1	1	1	1	0					131834	exact	Haliclona	Grant, 1836	FALSE		Haliclona (Soestella) implexa	166642
Species		Haliclona rhizophora		Haliclona rhizophora									Haliclona (Rhizoniera) rhizophora		166636	(Vacelet, 1969)		89	Animalia	Porifera	Demospongiae	Haplosclerida	Chalinidae	Haliclona		rhizophora	(Vacelet, 1969)	8	1	1	1	1	1	1	0	2					166636	exact	Haliclona (Rhizoniera) rhizophora	(Vacelet, 1969)	FALSE	TRUE	Haliclona (Soestella) mamillata	166645
Species		Haliclona sarai		Haliclona sarai									Haliclona (Rhizoniera) sarai		244433	(Pulitzer-Finali, 1969)		90	Animalia	Porifera	Demospongiae	Haplosclerida	Chalinidae	Haliclona		sarai	(Pulitzer-Finali, 1969)	8	1	1	1	1	1	1	0	2					244433	exact	Haliclona (Rhizoniera) sarai	(Pulitzer-Finali, 1969)	FALSE	TRUE	Haliclona (Soestella) mucosa	166647
Subgenus		Soestella		Soestella											131834	Grant, 1836			Animalia	Porifera	Demospongiae	Haplosclerida	Chalinidae	Haliclona	Soestella			7	1	1	1	1	1	1	1	0					131834	exact	Haliclona	Grant, 1836	FALSE		Halisarca	131822
Species		Haliclona implexa		Haliclona implexa									Haliclona (Soestella) implexa		166642	(Schmidt, 1868)		91	Animalia	Porifera	Demospongiae	Haplosclerida	Chalinidae	Haliclona		implexa	(Schmidt, 1868)	8	1	1	1	1	1	1	0	2					166642	exact	Haliclona (Soestella) implexa	(Schmidt, 1868)	FALSE	TRUE	Halisarca dujardinii	132736
Species		Haliclona mamillata		Haliclona mamillata									Haliclona (Soestella) mamillata		166645	(Griessinger, 1971)		92	Animalia	Porifera	Demospongiae	Haplosclerida	Chalinidae	Haliclona		mamillata	(Griessinger, 1971)	8	1	1	1	1	1	1	0	2					166645	exact	Haliclona (Soestella) mamillata	(Griessinger, 1971)	FALSE	TRUE	Halisarcidae	131634
Species		Haliclona mucosa		Haliclona mucosa									Haliclona (Soestella) mucosa		166647	(Griessinger, 1971)		93	Animalia	Porifera	Demospongiae	Haplosclerida	Chalinidae	Haliclona		mucosa	(Griessinger, 1971)	8	1	1	1	1	1	1	0	2					166647	exact	Haliclona (Soestella) mucosa	(Griessinger, 1971)	FALSE	TRUE	Hamacantha	131902
Family		Niphatidae		Niphatidae						Niphatidae					131637	van Soest, 1980			Animalia	Porifera	Demospongiae	Haplosclerida	Niphatidae					5	1	1	1	1	1	0	0	0					131637	exact	Niphatidae	van Soest, 1980	TRUE		Hamacantha	131902
Genus		Pachychalina		Pachychalina							Pachychalina				131845	Schmidt, 1868			Animalia	Porifera	Demospongiae	Haplosclerida	Niphatidae	Pachychalina				6	1	1	1	1	1	1	0	0					131845	exact	Pachychalina	Schmidt, 1868	TRUE		Hamacantha (Vomerula) falcula	168431
Species		Pachychalina rustica		Pachychalina rustica									Pachychalina rustica		132912	Schmidt, 1868		94	Animalia	Porifera	Demospongiae	Haplosclerida	Niphatidae	Pachychalina		rustica	Schmidt, 1868	8	1	1	1	1	1	1	0	2					132912	exact	Pachychalina rustica	Schmidt, 1868	TRUE	TRUE	Hamacanthidae	131647
Family		Petrosiidae		Petrosiidae						Petrosiidae					131638	van Soest, 1980			Animalia	Porifera	Demospongiae	Haplosclerida	Petrosiidae					5	1	1	1	1	1	0	0	0					131638	exact	Petrosiidae	van Soest, 1980	TRUE		Haplosclerida	131598
Genus		Petrosia		Petrosia							Petrosia				131847	Vosmaer, 1885			Animalia	Porifera	Demospongiae	Haplosclerida	Petrosiidae	Petrosia				6	1	1	1	1	1	1	0	0					131847	exact	Petrosia	Vosmaer, 1885	TRUE		Hemiasterella	132035
Species		Petrosia pulitzeri		Petrosia pulitzeri									Petrosia pulitzeri		383231	Pansini, 1996		95	Animalia	Porifera	Demospongiae	Haplosclerida	Petrosiidae	Petrosia		pulitzeri	Pansini, 1996	8	1	1	1	1	1	1	0	2					383231	exact	Petrosia pulitzeri	Pansini, 1996	TRUE	TRUE	Hemiasterella aristoteliana	134166
Subgenus		Petrosia		Petrosia											131847	Vosmaer, 1885			Animalia	Porifera	Demospongiae	Haplosclerida	Petrosiidae	Petrosia	Petrosia			7	1	1	1	1	1	1	1	0					131847	exact	Petrosia	Vosmaer, 1885	TRUE		Hemiasterellidae	131670
Species		Petrosia clavata		Petrosia clavata									Petrosia (Petrosia) clavata		166827	(Esper, 1794)		96	Animalia	Porifera	Demospongiae	Haplosclerida	Petrosiidae	Petrosia		clavata	(Esper, 1794)	8	1	1	1	1	1	1	0	2					166827	exact	Petrosia (Petrosia) clavata	(Esper, 1794)	FALSE	TRUE	Hemimycale	131948
Species		Petrosia ficiformis		Petrosia ficiformis									Petrosia (Petrosia) ficiformis		166837	(Poiret, 1789)		97	Animalia	Porifera	Demospongiae	Haplosclerida	Petrosiidae	Petrosia		ficiformis	(Poiret, 1789)	8	1	1	1	1	1	1	0	2					166837	exact	Petrosia (Petrosia) ficiformis	(Poiret, 1789)	FALSE	TRUE	Hemimycale columella	133543
Family		Phloeodictyidae		Phloeodictyidae						Phloeodictyidae					131639	Carter, 1882			Animalia	Porifera	Demospongiae	Haplosclerida	Phloeodictyidae					5	1	1	1	1	1	0	0	0					131639	exact	Phloeodictyidae	Carter, 1882	TRUE		Heteroxyidae	165967
Genus		Calyx		Calyx							Calyx				131851	Vosmaer, 1885			Animalia	Porifera	Demospongiae	Haplosclerida	Phloeodictyidae	Calyx				6	1	1	1	1	1	1	0	0					131851	exact	Calyx	Vosmaer, 1885	TRUE		Hexactinellida	22612
Species		Calyx nicaeensis		Calyx nicaeensis									Calyx nicaeensis		166932	(Risso, 1826)		98	Animalia	Porifera	Demospongiae	Haplosclerida	Phloeodictyidae	Calyx		nicaeensis	(Risso, 1826)	8	1	1	1	1	1	1	0	2					166932	exact	Calyx nicaeensis	(Risso, 1826)	TRUE	TRUE	Hexadella	131742
Order		Merliida		Merliida					Merliida						845502	Vacelet, 1979			Animalia	Porifera	Demospongiae	Merliida						4	1	1	1	1	0	0	0	0					845502	exact	Merliida	Vacelet, 1979	TRUE		Hexadella pruvoti	169685
Family		Hamacanthidae		Hamacanthidae						Hamacanthidae					131647	Gray, 1872			Animalia	Porifera	Demospongiae	Merliida	Hamacanthidae					5	1	1	1	1	1	0	0	0					131647	exact	Hamacanthidae	Gray, 1872	TRUE		Hexadella racovitzai	132315
Genus		Hamacantha		Hamacantha							Hamacantha				131902	Gray, 1867			Animalia	Porifera	Demospongiae	Merliida	Hamacanthidae	Hamacantha				6	1	1	1	1	1	1	0	0					131902	exact	Hamacantha	Gray, 1867	TRUE		Hippospongia	131757
Subgenus		Vomerula		Vomerula											131902	Gray, 1867			Animalia	Porifera	Demospongiae	Merliida	Hamacanthidae	Hamacantha	Vomerula			7	1	1	1	1	1	1	1	0					131902	exact	Hamacantha	Gray, 1867	FALSE		Hippospongia communis	132377
Species		Hamacantha falcula		Hamacantha falcula									Hamacantha (Vomerula) falcula		168431	(Bowerbank, 1874)		99	Animalia	Porifera	Demospongiae	Merliida	Hamacanthidae	Hamacantha		falcula	(Bowerbank, 1874)	8	1	1	1	1	1	1	0	2					168431	exact	Hamacantha (Vomerula) falcula	(Bowerbank, 1874)	FALSE	TRUE	Homoscleromorpha	131587
Family		Merliidae		Merliidae						Merliidae					168478	Kirkpatrick, 1908			Animalia	Porifera	Demospongiae	Merliida	Merliidae					5	1	1	1	1	1	0	0	0					168478	exact	Merliidae	Kirkpatrick, 1908	TRUE		Homosclerophorida	131601
Genus		Merlia		Merlia							Merlia				168479	Kirkpatrick, 1908			Animalia	Porifera	Demospongiae	Merliida	Merliidae	Merlia				6	1	1	1	1	1	1	0	0					168479	exact	Merlia	Kirkpatrick, 1908	TRUE		Hymedesmia	131950
Species		Merlia normani		Merlia normani									Merlia normani		168482	Kirkpatrick, 1908		100	Animalia	Porifera	Demospongiae	Merliida	Merliidae	Merlia		normani	Kirkpatrick, 1908	8	1	1	1	1	1	1	0	2					168482	exact	Merlia normani	Kirkpatrick, 1908	TRUE	TRUE	Hymedesmia	131950
Order		Poecilosclerida		Poecilosclerida					Poecilosclerida						131599	Topsent, 1928			Animalia	Porifera	Demospongiae	Poecilosclerida						4	1	1	1	1	0	0	0	0					131599	exact	Poecilosclerida	Topsent, 1928	TRUE		Hymedesmia (Hymedesmia) pansa	133620
Family		Coelosphaeridae		Coelosphaeridae						Coelosphaeridae					131650	Dendy, 1922			Animalia	Porifera	Demospongiae	Poecilosclerida	Coelosphaeridae					5	1	1	1	1	1	0	0	0					131650	exact	Coelosphaeridae	Dendy, 1922	TRUE		Hymedesmia (Hymedesmia) peachii	133622
Genus		Forcepia		Forcepia							Forcepia				131921	Carter, 1874			Animalia	Porifera	Demospongiae	Poecilosclerida	Coelosphaeridae	Forcepia				6	1	1	1	1	1	1	0	0					131921	exact	Forcepia	Carter, 1874	TRUE		Hymedesmia (Hymedesmia) simillima	133644
Subgenus		Leptolabis		Leptolabis											131921	Carter, 1874			Animalia	Porifera	Demospongiae	Poecilosclerida	Coelosphaeridae	Forcepia	Leptolabis			7	1	1	1	1	1	1	1	0					131921	exact	Forcepia	Carter, 1874	FALSE		Hymedesmia (Hymedesmia) versicolor	133665
Species		Forcepia luciensis		Forcepia luciensis									Forcepia (Leptolabis) luciensis		168891	(Topsent, 1888)		101	Animalia	Porifera	Demospongiae	Poecilosclerida	Coelosphaeridae	Forcepia		luciensis	(Topsent, 1888)	8	1	1	1	1	1	1	0	2					168891	exact	Forcepia (Leptolabis) luciensis	(Topsent, 1888)	FALSE	TRUE	Hymedesmiidae	131655
Genus		Lissodendoryx		Lissodendoryx							Lissodendoryx				131930	Topsent, 1892			Animalia	Porifera	Demospongiae	Poecilosclerida	Coelosphaeridae	Lissodendoryx				6	1	1	1	1	1	1	0	0					131930	exact	Lissodendoryx	Topsent, 1892	TRUE		Hymeniacidon	131808
Subgenus		Lissodendoryx		Lissodendoryx											131930	Topsent, 1892			Animalia	Porifera	Demospongiae	Poecilosclerida	Coelosphaeridae	Lissodendoryx	Lissodendoryx			7	1	1	1	1	1	1	1	0					131930	exact	Lissodendoryx	Topsent, 1892	TRUE		Hymeniacidon perlevis	132663
Species		Lissodendoryx isodictyalis		Lissodendoryx isodictyalis									Lissodendoryx (Lissodendoryx) isodictyalis		168968	(Carter, 1882)		102	Animalia	Porifera	Demospongiae	Poecilosclerida	Coelosphaeridae	Lissodendoryx		isodictyalis	(Carter, 1882)	8	1	1	1	1	1	1	0	2					168968	exact	Lissodendoryx (Lissodendoryx) isodictyalis	(Carter, 1882)	FALSE	TRUE	Hymerhabdia	131785
Family		Crambeidae		Crambeidae						Crambeidae					131651	Lévi, 1963			Animalia	Porifera	Demospongiae	Poecilosclerida	Crambeidae					5	1	1	1	1	1	0	0	0					131651	exact	Crambeidae	Lévi, 1963	TRUE		Hymerhabdia intermedia	132524
Genus		Crambe		Crambe							Crambe				131931	Vosmaer, 1880			Animalia	Porifera	Demospongiae	Poecilosclerida	Crambeidae	Crambe				6	1	1	1	1	1	1	0	0					131931	exact	Crambe	Vosmaer, 1880	TRUE		Hymerhabdiidae	598619
Species		Crambe crambe		Crambe crambe									Crambe crambe		133445	(Schmidt, 1862)		103	Animalia	Porifera	Demospongiae	Poecilosclerida	Crambeidae	Crambe		crambe	(Schmidt, 1862)	8	1	1	1	1	1	1	0	2					133445	exact	Crambe crambe	(Schmidt, 1862)	TRUE	TRUE	Hyrtios	131767
Family		Crellidae		Crellidae						Crellidae					131652	Dendy, 1922			Animalia	Porifera	Demospongiae	Poecilosclerida	Crellidae					5	1	1	1	1	1	0	0	0					131652	exact	Crellidae	Dendy, 1922	TRUE		Hyrtios collectrix	132448
Genus		Crella		Crella							Crella				131936	Gray, 1867			Animalia	Porifera	Demospongiae	Poecilosclerida	Crellidae	Crella				6	1	1	1	1	1	1	0	0					131936	exact	Crella	Gray, 1867	TRUE		Ianthellidae	169676
Subgenus		Pytheas		Pytheas											131936	Gray, 1867			Animalia	Porifera	Demospongiae	Poecilosclerida	Crellidae	Crella	Pytheas			7	1	1	1	1	1	1	1	0					131936	exact	Crella	Gray, 1867	FALSE		Ircinia	131751
Species		Crella fusifera		Crella fusifera									Crella (Pytheas) fusifera		169069	Sarà, 1969		104	Animalia	Porifera	Demospongiae	Poecilosclerida	Crellidae	Crella		fusifera	Sarà, 1969	8	1	1	1	1	1	1	0	2					169069	exact	Crella (Pytheas) fusifera	Sarà, 1969	FALSE	TRUE	Ircinia dendroides	132349
Species		Crella sigmata		Crella sigmata									Crella (Pytheas) sigmata		246130	Topsent, 1925		105	Animalia	Porifera	Demospongiae	Poecilosclerida	Crellidae	Crella		sigmata	Topsent, 1925	8	1	1	1	1	1	1	0	2					246130	exact	Crella (Pytheas) sigmata	Topsent, 1925	FALSE	TRUE	Ircinia oros	132356
Family		Esperiopsidae		Esperiopsidae						Esperiopsidae					168337	Hentschel, 1923			Animalia	Porifera	Demospongiae	Poecilosclerida	Esperiopsidae					5	1	1	1	1	1	0	0	0					168337	exact	Esperiopsidae	Hentschel, 1923	TRUE		Ircinia paucifilamentosa	132357
Genus		Ulosa		Ulosa							Ulosa				131912	de Laubenfels, 1936			Animalia	Porifera	Demospongiae	Poecilosclerida	Esperiopsidae	Ulosa				6	1	1	1	1	1	1	0	0					131912	exact	Ulosa	de Laubenfels, 1936	TRUE		Ircinia retidermata	132360
Species		Ulosa stuposa		Ulosa stuposa									Ulosa stuposa		133323	(Esper, 1794)		106	Animalia	Porifera	Demospongiae	Poecilosclerida	Esperiopsidae	Ulosa		stuposa	(Esper, 1794)	8	1	1	1	1	1	1	0	2					133323	exact	Ulosa stuposa	(Esper, 1794)	TRUE	TRUE	Ircinia variabilis	132362
Species		Ulosa tenellula		Ulosa tenellula									Ulosa tenellula		133324	Pulitzer-Finali, 1983		107	Animalia	Porifera	Demospongiae	Poecilosclerida	Esperiopsidae	Ulosa		tenellula	Pulitzer-Finali, 1983	8	1	1	1	1	1	1	0	2					133324	exact	Ulosa tenellula	Pulitzer-Finali, 1983	TRUE	TRUE	Ircinia vestibulata	447737
Family		Hymedesmiidae		Hymedesmiidae						Hymedesmiidae					131655	Topsent, 1928			Animalia	Porifera	Demospongiae	Poecilosclerida	Hymedesmiidae					5	1	1	1	1	1	0	0	0					131655	exact	Hymedesmiidae	Topsent, 1928	TRUE		Irciniidae	131625
Genus		Hemimycale		Hemimycale							Hemimycale				131948	Burton, 1934			Animalia	Porifera	Demospongiae	Poecilosclerida	Hymedesmiidae	Hemimycale				6	1	1	1	1	1	1	0	0					131948	exact	Hemimycale	Burton, 1934	TRUE		Jaspis	131999
Species		Hemimycale columella		Hemimycale columella									Hemimycale columella		133543	(Bowerbank, 1874)		108	Animalia	Porifera	Demospongiae	Poecilosclerida	Hymedesmiidae	Hemimycale		columella	(Bowerbank, 1874)	8	1	1	1	1	1	1	0	2					133543	exact	Hemimycale columella	(Bowerbank, 1874)	TRUE	TRUE	Jaspis johnstonii	134000
Genus		Hymedesmia		Hymedesmia							Hymedesmia				131950	Bowerbank, 1864			Animalia	Porifera	Demospongiae	Poecilosclerida	Hymedesmiidae	Hymedesmia				6	1	1	1	1	1	1	0	0					131950	exact	Hymedesmia	Bowerbank, 1864	TRUE		Laminospongia	131809
Subgenus		Hymedesmia		Hymedesmia											131950	Bowerbank, 1864			Animalia	Porifera	Demospongiae	Poecilosclerida	Hymedesmiidae	Hymedesmia	Hymedesmia			7	1	1	1	1	1	1	1	0					131950	exact	Hymedesmia	Bowerbank, 1864	TRUE		Laminospongia subtilis	132667
Species		Hymedesmia pansa		Hymedesmia pansa									Hymedesmia (Hymedesmia) pansa		133620	Bowerbank, 1882		109	Animalia	Porifera	Demospongiae	Poecilosclerida	Hymedesmiidae	Hymedesmia		pansa	Bowerbank, 1882	8	1	1	1	1	1	1	0	2					133620	exact	Hymedesmia (Hymedesmia) pansa	Bowerbank, 1882	FALSE	TRUE	Leiodermatium	132086
Species		Hymedesmia peachii		Hymedesmia peachii									Hymedesmia (Hymedesmia) peachii		133622	Bowerbank, 1882		110	Animalia	Porifera	Demospongiae	Poecilosclerida	Hymedesmiidae	Hymedesmia		peachii	Bowerbank, 1882	8	1	1	1	1	1	1	0	2					133622	exact	Hymedesmia (Hymedesmia) peachii	Bowerbank, 1882	FALSE	TRUE	Leiodermatium	132086
Species		Hymedesmia simillima		Hymedesmia simillima									Hymedesmia (Hymedesmia) simillima		133644	Lundbeck, 1910		111	Animalia	Porifera	Demospongiae	Poecilosclerida	Hymedesmiidae	Hymedesmia		simillima	Lundbeck, 1910	8	1	1	1	1	1	1	0	2					133644	exact	Hymedesmia (Hymedesmia) simillima	Lundbeck, 1910	FALSE	TRUE	Leiodermatium lynceus	134344
Species		Hymedesmia versicolor		Hymedesmia versicolor									Hymedesmia (Hymedesmia) versicolor		133665	(Topsent, 1893)		112	Animalia	Porifera	Demospongiae	Poecilosclerida	Hymedesmiidae	Hymedesmia		versicolor	(Topsent, 1893)	8	1	1	1	1	1	1	0	2					133665	exact	Hymedesmia (Hymedesmia) versicolor	(Topsent, 1893)	FALSE	TRUE	Leucandra	131704
Genus		Phorbas		Phorbas							Phorbas				131953	Duchassaing & Michelotti, 1864			Animalia	Porifera	Demospongiae	Poecilosclerida	Hymedesmiidae	Phorbas				6	1	1	1	1	1	1	0	0					131953	exact	Phorbas	Duchassaing & Michelotti, 1864	TRUE		Leucandra nausicaae	164353
Species		Phorbas fictitius		Phorbas fictitius									Phorbas fictitius		133679	(Bowerbank, 1866)		113	Animalia	Porifera	Demospongiae	Poecilosclerida	Hymedesmiidae	Phorbas		fictitius	(Bowerbank, 1866)	8	1	1	1	1	1	1	0	2					133679	exact	Phorbas fictitius	(Bowerbank, 1866)	TRUE	TRUE	Leucetta	131731
Species		Phorbas posidoni		Phorbas posidoni									Phorbas posidoni		133689	Voultsiadou-Koukoura & van Soest, 1991		114	Animalia	Porifera	Demospongiae	Poecilosclerida	Hymedesmiidae	Phorbas		posidoni	Voultsiadou-Koukoura & van Soest, 1991	8	1	1	1	1	1	1	0	2					133689	exact	Phorbas posidoni	Voultsiadou-Koukoura & van Soest, 1991	TRUE	TRUE	Leucetta solida	132286
Species		Phorbas tenacior		Phorbas tenacior									Phorbas tenacior		133693	(Topsent, 1925)		115	Animalia	Porifera	Demospongiae	Poecilosclerida	Hymedesmiidae	Phorbas		tenacior	(Topsent, 1925)	8	1	1	1	1	1	1	0	2					133693	exact	Phorbas tenacior	(Topsent, 1925)	TRUE	TRUE	Leucettidae	164745
Species		Phorbas topsenti		Phorbas topsenti									Phorbas topsenti		367374	Vacelet & Perez, 2008		116	Animalia	Porifera	Demospongiae	Poecilosclerida	Hymedesmiidae	Phorbas		topsenti	Vacelet & Perez, 2008	8	1	1	1	1	1	1	0	2					367374	exact	Phorbas topsenti	Vacelet & Perez, 2008	TRUE	TRUE	Leucosolenida	131591
Family		Microcionidae		Microcionidae						Microcionidae					131641	Carter, 1875			Animalia	Porifera	Demospongiae	Poecilosclerida	Microcionidae					5	1	1	1	1	1	0	0	0					131641	exact	Microcionidae	Carter, 1875	TRUE		Lissodendoryx	131930
Genus		Antho		Antho							Antho				131865	Gray, 1867			Animalia	Porifera	Demospongiae	Poecilosclerida	Microcionidae	Antho				6	1	1	1	1	1	1	0	0					131865	exact	Antho	Gray, 1867	TRUE		Lissodendoryx	131930
Subgenus		Antho		Antho											131865	Gray, 1867			Animalia	Porifera	Demospongiae	Poecilosclerida	Microcionidae	Antho	Antho			7	1	1	1	1	1	1	1	0					131865	exact	Antho	Gray, 1867	TRUE		Lissodendoryx (Lissodendoryx) isodictyalis	168968
Species		Antho involvens		Antho involvens									Antho (Antho) involvens		167886	(Schmidt, 1864)		117	Animalia	Porifera	Demospongiae	Poecilosclerida	Microcionidae	Antho		involvens	(Schmidt, 1864)	8	1	1	1	1	1	1	0	2					167886	exact	Antho (Antho) involvens	(Schmidt, 1864)	FALSE	TRUE	Lyssacinosida	171834
Genus		Clathria		Clathria							Clathria				131868	Schmidt, 1862			Animalia	Porifera	Demospongiae	Poecilosclerida	Microcionidae	Clathria				6	1	1	1	1	1	1	0	0					131868	exact	Clathria	Schmidt, 1862	TRUE		Merlia	168479
Subgenus		Clathria		Clathria											131868	Schmidt, 1862			Animalia	Porifera	Demospongiae	Poecilosclerida	Microcionidae	Clathria	Clathria			7	1	1	1	1	1	1	1	0					131868	exact	Clathria	Schmidt, 1862	TRUE		Merlia normani	168482
Species		Clathria toxistricta		Clathria toxistricta									Clathria (Clathria) toxistricta		167582	Topsent, 1925		118	Animalia	Porifera	Demospongiae	Poecilosclerida	Microcionidae	Clathria		toxistricta	Topsent, 1925	8	1	1	1	1	1	1	0	2					167582	exact	Clathria (Clathria) toxistricta	Topsent, 1925	FALSE	TRUE	Merliida	845502
Species		Clathria toxistyla		Clathria toxistyla									Clathria (Clathria) toxistyla		167697	(Sarà, 1959)		119	Animalia	Porifera	Demospongiae	Poecilosclerida	Microcionidae	Clathria		toxistyla	(Sarà, 1959)	8	1	1	1	1	1	1	0	2					167697	exact	Clathria (Clathria) toxistyla	(Sarà, 1959)	FALSE	TRUE	Merliidae	168478
Species		Clathria toxivaria		Clathria toxivaria									Clathria (Clathria) toxivaria		408856	(Sarà, 1959)		120	Animalia	Porifera	Demospongiae	Poecilosclerida	Microcionidae	Clathria		toxivaria	(Sarà, 1959)	8	1	1	1	1	1	1	0	2					408856	exact	Clathria (Clathria) toxivaria	(Sarà, 1959)	FALSE	TRUE	Microcionidae	131641
Subgenus		Microciona		Microciona											131868	Schmidt, 1862			Animalia	Porifera	Demospongiae	Poecilosclerida	Microcionidae	Clathria	Microciona			7	1	1	1	1	1	1	1	0					131868	exact	Clathria	Schmidt, 1862	FALSE		Mycale	131907
Species		Clathria cleistochela		Clathria cleistochela									Clathria (Microciona) cleistochela		167628	(Topsent, 1925)		121	Animalia	Porifera	Demospongiae	Poecilosclerida	Microcionidae	Clathria		cleistochela	(Topsent, 1925)	8	1	1	1	1	1	1	0	2					167628	exact	Clathria (Microciona) cleistochela	(Topsent, 1925)	FALSE	TRUE	Mycale	131907
Species		Clathria gradalis		Clathria gradalis									Clathria (Microciona) gradalis		167642	Topsent, 1925		122	Animalia	Porifera	Demospongiae	Poecilosclerida	Microcionidae	Clathria		gradalis	Topsent, 1925	8	1	1	1	1	1	1	0	2					167642	exact	Clathria (Microciona) gradalis	Topsent, 1925	FALSE	TRUE	Mycale	131907
Subgenus		Thalysias		Thalysias											131868	Schmidt, 1862			Animalia	Porifera	Demospongiae	Poecilosclerida	Microcionidae	Clathria	Thalysias			7	1	1	1	1	1	1	1	0					131868	exact	Clathria	Schmidt, 1862	FALSE		Mycale	131907
Species		Clathria jolicoeuri		Clathria jolicoeuri									Clathria (Thalysias) jolicoeuri		167744	(Topsent, 1892)		123	Animalia	Porifera	Demospongiae	Poecilosclerida	Microcionidae	Clathria		jolicoeuri	(Topsent, 1892)	8	1	1	1	1	1	1	0	2					167744	exact	Clathria (Thalysias) jolicoeuri	(Topsent, 1892)	FALSE	TRUE	Mycale	131907
Genus		Echinoclathria		Echinoclathria							Echinoclathria				167906	Carter, 1885			Animalia	Porifera	Demospongiae	Poecilosclerida	Microcionidae	Echinoclathria				6	1	1	1	1	1	1	0	0					167906	exact	Echinoclathria	Carter, 1885	TRUE		Mycale (Aegogropila) contarenii	168526
Species		Echinoclathria translata		Echinoclathria translata									Echinoclathria translata		167932	(Pulitzer-Finali, 1978)		124	Animalia	Porifera	Demospongiae	Poecilosclerida	Microcionidae	Echinoclathria		translata	(Pulitzer-Finali, 1978)	8	1	1	1	1	1	1	0	2					167932	exact	Echinoclathria translata	(Pulitzer-Finali, 1978)	TRUE	TRUE	Mycale (Aegogropila) retifera	168543
Family		Mycalidae		Mycalidae						Mycalidae					131649	Lundbeck, 1905			Animalia	Porifera	Demospongiae	Poecilosclerida	Mycalidae					5	1	1	1	1	1	0	0	0					131649	exact	Mycalidae	Lundbeck, 1905	TRUE		Mycale (Aegogropila) rotalis	168544
Genus		Mycale		Mycale							Mycale				131907	Gray, 1867			Animalia	Porifera	Demospongiae	Poecilosclerida	Mycalidae	Mycale				6	1	1	1	1	1	1	0	0					131907	exact	Mycale	Gray, 1867	TRUE		Mycale (Aegogropila) syrinx	168549
Subgenus		Aegogropila		Aegogropila											131907	Gray, 1867			Animalia	Porifera	Demospongiae	Poecilosclerida	Mycalidae	Mycale	Aegogropila			7	1	1	1	1	1	1	1	0					131907	exact	Mycale	Gray, 1867	FALSE		Mycale (Aegogropila) tunicata	168550
Species		Mycale contarenii		Mycale contarenii									Mycale (Aegogropila) contarenii		168526	(Lieberkühn, 1859)		125	Animalia	Porifera	Demospongiae	Poecilosclerida	Mycalidae	Mycale		contarenii	(Lieberkühn, 1859)	8	1	1	1	1	1	1	0	2					168526	exact	Mycale (Aegogropila) contarenii	(Lieberkühn, 1859)	FALSE	TRUE	Mycale (Carmia) macilenta	168587
Species		Mycale retifera		Mycale retifera									Mycale (Aegogropila) retifera		168543	Topsent, 1924		126	Animalia	Porifera	Demospongiae	Poecilosclerida	Mycalidae	Mycale		retifera	Topsent, 1924	8	1	1	1	1	1	1	0	2					168543	exact	Mycale (Aegogropila) retifera	Topsent, 1924	FALSE	TRUE	Mycale (Mycale) lingua	168640
Species		Mycale rotalis		Mycale rotalis									Mycale (Aegogropila) rotalis		168544	(Bowerbank, 1874)		127	Animalia	Porifera	Demospongiae	Poecilosclerida	Mycalidae	Mycale		rotalis	(Bowerbank, 1874)	8	1	1	1	1	1	1	0	2					168544	exact	Mycale (Aegogropila) rotalis	(Bowerbank, 1874)	FALSE	TRUE	Mycale (Mycale) massa	168647
Species		Mycale syrinx		Mycale syrinx									Mycale (Aegogropila) syrinx		168549	(Schmidt, 1862)		128	Animalia	Porifera	Demospongiae	Poecilosclerida	Mycalidae	Mycale		syrinx	(Schmidt, 1862)	8	1	1	1	1	1	1	0	2					168549	exact	Mycale (Aegogropila) syrinx	(Schmidt, 1862)	FALSE	TRUE	Mycale (Paresperella) serrulata	168690
Species		Mycale tunicata		Mycale tunicata									Mycale (Aegogropila) tunicata		168550	(Schmidt, 1862)		129	Animalia	Porifera	Demospongiae	Poecilosclerida	Mycalidae	Mycale		tunicata	(Schmidt, 1862)	8	1	1	1	1	1	1	0	2					168550	exact	Mycale (Aegogropila) tunicata	(Schmidt, 1862)	FALSE	TRUE	Mycalidae	131649
Subgenus		Carmia		Carmia											131907	Gray, 1867			Animalia	Porifera	Demospongiae	Poecilosclerida	Mycalidae	Mycale	Carmia			7	1	1	1	1	1	1	1	0					131907	exact	Mycale	Gray, 1867	FALSE		Myrmekioderma	131794
Species		Mycale macilenta		Mycale macilenta									Mycale (Carmia) macilenta		168587	(Bowerbank, 1866)		130	Animalia	Porifera	Demospongiae	Poecilosclerida	Mycalidae	Mycale		macilenta	(Bowerbank, 1866)	8	1	1	1	1	1	1	0	2					168587	exact	Mycale (Carmia) macilenta	(Bowerbank, 1866)	FALSE	TRUE	Myrmekioderma spelaeum	166024
Subgenus		Mycale		Mycale											131907	Gray, 1867			Animalia	Porifera	Demospongiae	Poecilosclerida	Mycalidae	Mycale	Mycale			7	1	1	1	1	1	1	1	0					131907	exact	Mycale	Gray, 1867	TRUE		Myxilla	131970
Species		Mycale lingua		Mycale lingua									Mycale (Mycale) lingua		168640	(Bowerbank, 1866)		131	Animalia	Porifera	Demospongiae	Poecilosclerida	Mycalidae	Mycale		lingua	(Bowerbank, 1866)	8	1	1	1	1	1	1	0	2					168640	exact	Mycale (Mycale) lingua	(Bowerbank, 1866)	FALSE	TRUE	Myxilla	131970
Species		Mycale massa		Mycale massa									Mycale (Mycale) massa		168647	(Schmidt, 1862)		132	Animalia	Porifera	Demospongiae	Poecilosclerida	Mycalidae	Mycale		massa	(Schmidt, 1862)	8	1	1	1	1	1	1	0	2					168647	exact	Mycale (Mycale) massa	(Schmidt, 1862)	FALSE	TRUE	Myxilla (Myxilla) rosacea	169488
Subgenus		Paresperella		Paresperella											131907	Gray, 1867			Animalia	Porifera	Demospongiae	Poecilosclerida	Mycalidae	Mycale	Paresperella			7	1	1	1	1	1	1	1	0					131907	exact	Mycale	Gray, 1867	FALSE		Myxillidae	131658
Species		Mycale serrulata		Mycale serrulata									Mycale (Paresperella) serrulata		168690	Sarà & Siribelli, 1960		133	Animalia	Porifera	Demospongiae	Poecilosclerida	Mycalidae	Mycale		serrulata	Sarà & Siribelli, 1960	8	1	1	1	1	1	1	0	2					168690	exact	Mycale (Paresperella) serrulata	Sarà & Siribelli, 1960	FALSE	TRUE	Niphatidae	131637
Family		Myxillidae		Myxillidae						Myxillidae					131658	Dendy, 1922			Animalia	Porifera	Demospongiae	Poecilosclerida	Myxillidae					5	1	1	1	1	1	0	0	0					131658	exact	Myxillidae	Dendy, 1922	TRUE		Oscarella	131979
Genus		Myxilla		Myxilla							Myxilla				131970	Schmidt, 1862			Animalia	Porifera	Demospongiae	Poecilosclerida	Myxillidae	Myxilla				6	1	1	1	1	1	1	0	0					131970	exact	Myxilla	Schmidt, 1862	TRUE		Oscarella balibaloi	564911
Subgenus		Myxilla		Myxilla											131970	Schmidt, 1862			Animalia	Porifera	Demospongiae	Poecilosclerida	Myxillidae	Myxilla	Myxilla			7	1	1	1	1	1	1	1	0					131970	exact	Myxilla	Schmidt, 1862	TRUE		Oscarella lobularis	133928
Species		Myxilla rosacea		Myxilla rosacea									Myxilla (Myxilla) rosacea		169488	(Lieberkühn, 1859)		134	Animalia	Porifera	Demospongiae	Poecilosclerida	Myxillidae	Myxilla		rosacea	(Lieberkühn, 1859)	8	1	1	1	1	1	1	0	2					169488	exact	Myxilla (Myxilla) rosacea	(Lieberkühn, 1859)	FALSE	TRUE	Oscarella microlobata	169719
Family		Tedaniidae		Tedaniidae						Tedaniidae					131659	Ridley & Dendy, 1886			Animalia	Porifera	Demospongiae	Poecilosclerida	Tedaniidae					5	1	1	1	1	1	0	0	0					131659	exact	Tedaniidae	Ridley & Dendy, 1886	TRUE		Oscarella tuberculata	169724
Genus		Tedania		Tedania							Tedania				131974	Gray, 1867			Animalia	Porifera	Demospongiae	Poecilosclerida	Tedaniidae	Tedania				6	1	1	1	1	1	1	0	0					131974	exact	Tedania	Gray, 1867	TRUE		Oscarellidae	150263
Subgenus		Tedania		Tedania											131974	Gray, 1867			Animalia	Porifera	Demospongiae	Poecilosclerida	Tedaniidae	Tedania	Tedania			7	1	1	1	1	1	1	1	0					131974	exact	Tedania	Gray, 1867	TRUE		Pachastrella	132015
Species		Tedania anhelans		Tedania anhelans									Tedania (Tedania) anhelans		169546	(Vio in Olivi, 1792)		135	Animalia	Porifera	Demospongiae	Poecilosclerida	Tedaniidae	Tedania		anhelans	(Vio in Olivi, 1792)	8	1	1	1	1	1	1	0	2					169546	exact	Tedania (Tedania) anhelans	(Vio in Olivi, 1792)	FALSE	TRUE	Pachastrella monilifera	134078
Order		Polymastiida		Polymastiida					Polymastiida						845494	Morrow & Cárdenas, 2015			Animalia	Porifera	Demospongiae	Polymastiida						4	1	1	1	1	0	0	0	0					845494	exact	Polymastiida	Morrow & Cárdenas, 2015	TRUE		Pachastrellidae	131665
Family		Polymastiidae		Polymastiidae						Polymastiidae					131673	Gray, 1867			Animalia	Porifera	Demospongiae	Polymastiida	Polymastiidae					5	1	1	1	1	1	0	0	0					131673	exact	Polymastiidae	Gray, 1867	TRUE		Pachychalina	131845
Genus		Tentorium		Tentorium							Tentorium				132053	Vosmaer, 1887			Animalia	Porifera	Demospongiae	Polymastiida	Polymastiidae	Tentorium				6	1	1	1	1	1	1	0	0					132053	exact	Tentorium	Vosmaer, 1887	TRUE		Pachychalina rustica	132912
Species		Tentorium levantinum		Tentorium levantinum									Tentorium levantinum		170688	Ilan, Gugel, Galil & Janussen, 2003		136	Animalia	Porifera	Demospongiae	Polymastiida	Polymastiidae	Tentorium		levantinum	Ilan, Gugel, Galil & Janussen, 2003	8	1	1	1	1	1	1	0	2					170688	exact	Tentorium levantinum	Ilan, Gugel, Galil & Janussen, 2003	TRUE	TRUE	Paratimea	132036
Genus		Weberella		Weberella							Weberella				132059	Vosmaer, 1885			Animalia	Porifera	Demospongiae	Polymastiida	Polymastiidae	Weberella				6	1	1	1	1	1	1	0	0					132059	exact	Weberella	Vosmaer, 1885	TRUE		Paratimea pierantonii	134171
Species		Weberella verrucosa		Weberella verrucosa									Weberella verrucosa		134233	Vacelet, 1960		137	Animalia	Porifera	Demospongiae	Polymastiida	Polymastiidae	Weberella		verrucosa	Vacelet, 1960	8	1	1	1	1	1	1	0	2					134233	exact	Weberella verrucosa	Vacelet, 1960	TRUE	TRUE	Penares	131992
Order		Scopalinida		Scopalinida					Scopalinida						845472	Morrow & Cárdenas, 2015			Animalia	Porifera	Demospongiae	Scopalinida						4	1	1	1	1	0	0	0	0					845472	exact	Scopalinida	Morrow & Cárdenas, 2015	TRUE		Penares euastrum	597207
Family		Scopalinidae		Scopalinidae						Scopalinidae					598620	Morrow, Picton, Erpenbeck, Boury-Esnault, Maggs & Allcock, 2012			Animalia	Porifera	Demospongiae	Scopalinida	Scopalinidae					5	1	1	1	1	1	0	0	0					598620	exact	Scopalinidae	Morrow, Picton, Erpenbeck, Boury-Esnault, Maggs & Allcock, 2012	TRUE		Penares helleri	133961
Genus		Scopalina		Scopalina							Scopalina				131797	Schmidt, 1862			Animalia	Porifera	Demospongiae	Scopalinida	Scopalinidae	Scopalina				6	1	1	1	1	1	1	0	0					131797	exact	Scopalina	Schmidt, 1862	TRUE		Petrobiona	164643
Species		Scopalina lophyropoda		Scopalina lophyropoda									Scopalina lophyropoda		132557	Schmidt, 1862		138	Animalia	Porifera	Demospongiae	Scopalinida	Scopalinidae	Scopalina		lophyropoda	Schmidt, 1862	8	1	1	1	1	1	1	0	2					132557	exact	Scopalina lophyropoda	Schmidt, 1862	TRUE	TRUE	Petrobiona massiliana	164644
Order		Spongillida		Spongillida					Spongillida						845456	Manconi & Pronzato, 2002			Animalia	Porifera	Demospongiae	Spongillida						4	1	1	1	1	0	0	0	0					845456	exact	Spongillida	Manconi & Pronzato, 2002	TRUE		Petrobionidae	164642
Family		Spongillidae		Spongillidae						Spongillidae					167108	Gray, 1867			Animalia	Porifera	Demospongiae	Spongillida	Spongillidae					5	1	1	1	1	1	0	0	0					167108	exact	Spongillidae	Gray, 1867	TRUE		Petrosia	131847
Genus		Ephydatia		Ephydatia							Ephydatia				167141	Lamouroux, 1816			Animalia	Porifera	Demospongiae	Spongillida	Spongillidae	Ephydatia				6	1	1	1	1	1	1	0	0					167141	exact	Ephydatia	Lamouroux, 1816	TRUE		Petrosia	131847
Species		Ephydatia fluviatilis		Ephydatia fluviatilis									Ephydatia fluviatilis		167144	(Linnaeus, 1759)		139	Animalia	Porifera	Demospongiae	Spongillida	Spongillidae	Ephydatia		fluviatilis	(Linnaeus, 1759)	8	1	1	1	1	1	1	0	2					167144	exact	Ephydatia fluviatilis	(Linnaeus, 1759)	TRUE	TRUE	Petrosia (Petrosia) clavata	166827
Genus		Eunapius		Eunapius							Eunapius				167154	Gray, 1867			Animalia	Porifera	Demospongiae	Spongillida	Spongillidae	Eunapius				6	1	1	1	1	1	1	0	0					167154	exact	Eunapius	Gray, 1867	TRUE		Petrosia (Petrosia) ficiformis	166837
Species		Eunapius carteri		Eunapius carteri									Eunapius carteri		167156	(Bowerbank, 1863)		140	Animalia	Porifera	Demospongiae	Spongillida	Spongillidae	Eunapius		carteri	(Bowerbank, 1863)	8	1	1	1	1	1	1	0	2					167156	exact	Eunapius carteri	(Bowerbank, 1863)	TRUE	TRUE	Petrosia pulitzeri	383231
Order		Suberitida		Suberitida					Suberitida						845509	Chombard & Boury-Esnault, 1999			Animalia	Porifera	Demospongiae	Suberitida						4	1	1	1	1	0	0	0	0					845509	exact	Suberitida	Chombard & Boury-Esnault, 1999	TRUE		Petrosiidae	131638
Family		Halichondriidae		Halichondriidae						Halichondriidae					131633	Gray, 1867			Animalia	Porifera	Demospongiae	Suberitida	Halichondriidae					5	1	1	1	1	1	0	0	0					131633	exact	Halichondriidae	Gray, 1867	TRUE		Phloeodictyidae	131639
Genus		Axinyssa		Axinyssa							Axinyssa				131802	Lendenfeld, 1897			Animalia	Porifera	Demospongiae	Suberitida	Halichondriidae	Axinyssa				6	1	1	1	1	1	1	0	0					131802	exact	Axinyssa	Lendenfeld, 1897	TRUE		Phorbas	131953
Species		Axinyssa aurantiaca		Axinyssa aurantiaca									Axinyssa aurantiaca		165741	(Schmidt, 1864)		141	Animalia	Porifera	Demospongiae	Suberitida	Halichondriidae	Axinyssa		aurantiaca	(Schmidt, 1864)	8	1	1	1	1	1	1	0	2					165741	exact	Axinyssa aurantiaca	(Schmidt, 1864)	TRUE	TRUE	Phorbas fictitius	133679
Species		Axinyssa michaelis		Axinyssa michaelis									Axinyssa michaelis		255156	Kefalas & Castritsi-Catharios, 2007		142	Animalia	Porifera	Demospongiae	Suberitida	Halichondriidae	Axinyssa		michaelis	Kefalas & Castritsi-Catharios, 2007	8	1	1	1	1	1	1	0	2					255156	exact	Axinyssa michaelis	Kefalas & Castritsi-Catharios, 2007	TRUE	TRUE	Phorbas posidoni	133689
Genus		Halichondria		Halichondria							Halichondria				131807	Fleming, 1828			Animalia	Porifera	Demospongiae	Suberitida	Halichondriidae	Halichondria				6	1	1	1	1	1	1	0	0					131807	exact	Halichondria	Fleming, 1828	TRUE		Phorbas tenacior	133693
Subgenus		Halichondria		Halichondria											131807	Fleming, 1828			Animalia	Porifera	Demospongiae	Suberitida	Halichondriidae	Halichondria	Halichondria			7	1	1	1	1	1	1	1	0					131807	exact	Halichondria	Fleming, 1828	TRUE		Phorbas topsenti	367374
Species		Halichondria contorta		Halichondria contorta									Halichondria (Halichondria) contorta		165809	(Sarà, 1961)		143	Animalia	Porifera	Demospongiae	Suberitida	Halichondriidae	Halichondria		contorta	(Sarà, 1961)	8	1	1	1	1	1	1	0	2					165809	exact	Halichondria (Halichondria) contorta	(Sarà, 1961)	FALSE	TRUE	Plakina	131981
Species		Halichondria panicea		Halichondria panicea									Halichondria (Halichondria) panicea		165853	(Pallas, 1766)		144	Animalia	Porifera	Demospongiae	Suberitida	Halichondriidae	Halichondria		panicea	(Pallas, 1766)	8	1	1	1	1	1	1	0	2					165853	exact	Halichondria (Halichondria) panicea	(Pallas, 1766)	FALSE	TRUE	Plakina bowerbanki	169733
Genus		Hymeniacidon		Hymeniacidon							Hymeniacidon				131808	Bowerbank, 1858			Animalia	Porifera	Demospongiae	Suberitida	Halichondriidae	Hymeniacidon				6	1	1	1	1	1	1	0	0					131808	exact	Hymeniacidon	Bowerbank, 1858	TRUE		Plakina dilopha	133931
Species		Hymeniacidon perlevis		Hymeniacidon perlevis									Hymeniacidon perlevis		132663	(Montagu, 1814)		145	Animalia	Porifera	Demospongiae	Suberitida	Halichondriidae	Hymeniacidon		perlevis	(Montagu, 1814)	8	1	1	1	1	1	1	0	2					132663	exact	Hymeniacidon perlevis	(Montagu, 1814)	TRUE	TRUE	Plakina monolopha	133932
Genus		Laminospongia		Laminospongia							Laminospongia				131809	Pulitzer-Finali, 1983			Animalia	Porifera	Demospongiae	Suberitida	Halichondriidae	Laminospongia				6	1	1	1	1	1	1	0	0					131809	exact	Laminospongia	Pulitzer-Finali, 1983	TRUE		Plakina trilopha	133933
Species		Laminospongia subtilis		Laminospongia subtilis									Laminospongia subtilis		132667	Pulitzer-Finali, 1983		146	Animalia	Porifera	Demospongiae	Suberitida	Halichondriidae	Laminospongia		subtilis	Pulitzer-Finali, 1983	8	1	1	1	1	1	1	0	2					132667	exact	Laminospongia subtilis	Pulitzer-Finali, 1983	TRUE	TRUE	Plakina weinbergi	169751
Genus		Spongosorites		Spongosorites							Spongosorites				131818	Topsent, 1896			Animalia	Porifera	Demospongiae	Suberitida	Halichondriidae	Spongosorites				6	1	1	1	1	1	1	0	0					131818	exact	Spongosorites	Topsent, 1896	TRUE		Plakinastrella	131982
Species		Spongosorites flavens		Spongosorites flavens									Spongosorites flavens		132719	Pulitzer-Finali, 1983		147	Animalia	Porifera	Demospongiae	Suberitida	Halichondriidae	Spongosorites		flavens	Pulitzer-Finali, 1983	8	1	1	1	1	1	1	0	2					132719	exact	Spongosorites flavens	Pulitzer-Finali, 1983	TRUE	TRUE	Plakinastrella copiosa	133934
Species		Spongosorites intricatus		Spongosorites intricatus									Spongosorites intricatus		132721	(Topsent, 1892)		148	Animalia	Porifera	Demospongiae	Suberitida	Halichondriidae	Spongosorites		intricatus	(Topsent, 1892)	8	1	1	1	1	1	1	0	2					132721	exact	Spongosorites intricatus	(Topsent, 1892)	TRUE	TRUE	Plakinidae	131661
Genus		Topsentia		Topsentia							Topsentia				131821	Berg, 1899			Animalia	Porifera	Demospongiae	Suberitida	Halichondriidae	Topsentia				6	1	1	1	1	1	1	0	0					131821	exact	Topsentia	Berg, 1899	TRUE		Plakortis	131983
Species		Topsentia vaceleti		Topsentia vaceleti									Topsentia vaceleti		605315	Kefalas & Castritsi-Catharios, 2012		149	Animalia	Porifera	Demospongiae	Suberitida	Halichondriidae	Topsentia		vaceleti	Kefalas & Castritsi-Catharios, 2012	8	1	1	1	1	1	1	0	2					605315	exact	Topsentia vaceleti	Kefalas & Castritsi-Catharios, 2012	TRUE	TRUE	Plakortis simplex	133938
Family		Stylocordylidae		Stylocordylidae						Stylocordylidae					131675	Topsent, 1892			Animalia	Porifera	Demospongiae	Suberitida	Stylocordylidae					5	1	1	1	1	1	0	0	0					131675	exact	Stylocordylidae	Topsent, 1892	TRUE		Pleraplysilla	131743
Genus		Stylocordyla		Stylocordyla							Stylocordyla				132063	Thomson, 1873			Animalia	Porifera	Demospongiae	Suberitida	Stylocordylidae	Stylocordyla				6	1	1	1	1	1	1	0	0					132063	exact	Stylocordyla	Thomson, 1873	TRUE		Pleraplysilla spinifera	132317
Species		Stylocordyla pellita		Stylocordyla pellita									Stylocordyla pellita		185002	(Topsent, 1904)		150	Animalia	Porifera	Demospongiae	Suberitida	Stylocordylidae	Stylocordyla		pellita	(Topsent, 1904)	8	1	1	1	1	1	1	0	2					185002	exact	Stylocordyla pellita	(Topsent, 1904)	TRUE	TRUE	Poecillastra	132016
Family		Suberitidae		Suberitidae						Suberitidae					131676	Schmidt, 1870			Animalia	Porifera	Demospongiae	Suberitida	Suberitidae					5	1	1	1	1	1	0	0	0					131676	exact	Suberitidae	Schmidt, 1870	TRUE		Poecillastra compressa	134083
Genus		Aaptos		Aaptos							Aaptos				132064	Gray, 1867			Animalia	Porifera	Demospongiae	Suberitida	Suberitidae	Aaptos				6	1	1	1	1	1	1	0	0					132064	exact	Aaptos	Gray, 1867	TRUE		Poecilosclerida	131599
Species		Aaptos aaptos		Aaptos aaptos									Aaptos aaptos		134241	(Schmidt, 1864)		151	Animalia	Porifera	Demospongiae	Suberitida	Suberitidae	Aaptos		aaptos	(Schmidt, 1864)	8	1	1	1	1	1	1	0	2					134241	exact	Aaptos aaptos	(Schmidt, 1864)	TRUE	TRUE	Polymastiida	845494
Species		Aaptos papillata		Aaptos papillata									Aaptos papillata		134242	(Keller, 1880)		152	Animalia	Porifera	Demospongiae	Suberitida	Suberitidae	Aaptos		papillata	(Keller, 1880)	8	1	1	1	1	1	1	0	2					134242	exact	Aaptos papillata	(Keller, 1880)	TRUE	TRUE	Polymastiidae	131673
Genus		Protosuberites		Protosuberites							Protosuberites				170779	Swartschewsky, 1905			Animalia	Porifera	Demospongiae	Suberitida	Suberitidae	Protosuberites				6	1	1	1	1	1	1	0	0					170779	exact	Protosuberites	Swartschewsky, 1905	TRUE		Porifera	558
Species		Protosuberites denhartogi		Protosuberites denhartogi									Protosuberites denhartogi		170782	van Soest & de Kluijver, 2003		153	Animalia	Porifera	Demospongiae	Suberitida	Suberitidae	Protosuberites		denhartogi	van Soest & de Kluijver, 2003	8	1	1	1	1	1	1	0	2					170782	exact	Protosuberites denhartogi	van Soest & de Kluijver, 2003	TRUE	TRUE	Prosuberites	132068
Species		Protosuberites ectyoninus		Protosuberites ectyoninus									Protosuberites ectyoninus		170784	(Topsent, 1900)		154	Animalia	Porifera	Demospongiae	Suberitida	Suberitidae	Protosuberites		ectyoninus	(Topsent, 1900)	8	1	1	1	1	1	1	0	2					170784	exact	Protosuberites ectyoninus	(Topsent, 1900)	TRUE	TRUE	Prosuberites longispinus	134252
Species		Protosuberites rugosus		Protosuberites rugosus									Protosuberites rugosus		134254	(Topsent, 1893)		155	Animalia	Porifera	Demospongiae	Suberitida	Suberitidae	Protosuberites		rugosus	(Topsent, 1893)	8	1	1	1	1	1	1	0	2					134254	exact	Protosuberites rugosus	(Topsent, 1893)	TRUE	TRUE	Protosuberites	170779
Genus		Pseudosuberites		Pseudosuberites							Pseudosuberites				132069	Topsent, 1896			Animalia	Porifera	Demospongiae	Suberitida	Suberitidae	Pseudosuberites				6	1	1	1	1	1	1	0	0					132069	exact	Pseudosuberites	Topsent, 1896	TRUE		Protosuberites denhartogi	170782
Species		Pseudosuberites sulphureus		Pseudosuberites sulphureus									Pseudosuberites sulphureus		134260	(Bowerbank, 1866)		156	Animalia	Porifera	Demospongiae	Suberitida	Suberitidae	Pseudosuberites		sulphureus	(Bowerbank, 1866)	8	1	1	1	1	1	1	0	2					134260	exact	Pseudosuberites sulphureus	(Bowerbank, 1866)	TRUE	TRUE	Protosuberites ectyoninus	170784
Genus		Rhizaxinella		Rhizaxinella							Rhizaxinella				132071	Keller, 1880			Animalia	Porifera	Demospongiae	Suberitida	Suberitidae	Rhizaxinella				6	1	1	1	1	1	1	0	0					132071	exact	Rhizaxinella	Keller, 1880	TRUE		Protosuberites rugosus	134254
Species		Rhizaxinella pyrifera		Rhizaxinella pyrifera									Rhizaxinella pyrifera		134266	(Delle Chiaje, 1828)		157	Animalia	Porifera	Demospongiae	Suberitida	Suberitidae	Rhizaxinella		pyrifera	(Delle Chiaje, 1828)	8	1	1	1	1	1	1	0	2					134266	exact	Rhizaxinella pyrifera	(Delle Chiaje, 1828)	TRUE	TRUE	Pseudocorticium	131984
Species		Rhizaxinella shikmonae		Rhizaxinella shikmonae									Rhizaxinella shikmonae		170830	Ilan, Gugel, Galil & Janussen, 2003		158	Animalia	Porifera	Demospongiae	Suberitida	Suberitidae	Rhizaxinella		shikmonae	Ilan, Gugel, Galil & Janussen, 2003	8	1	1	1	1	1	1	0	2					170830	exact	Rhizaxinella shikmonae	Ilan, Gugel, Galil & Janussen, 2003	TRUE	TRUE	Pseudocorticium jarrei	133939
Genus		Suberites		Suberites							Suberites				132072	Nardo, 1833			Animalia	Porifera	Demospongiae	Suberitida	Suberitidae	Suberites				6	1	1	1	1	1	1	0	0					132072	exact	Suberites	Nardo, 1833	TRUE		Pseudosuberites	132069
Species		Suberites carnosus		Suberites carnosus									Suberites carnosus		134275	(Johnston, 1842)		159	Animalia	Porifera	Demospongiae	Suberitida	Suberitidae	Suberites		carnosus	(Johnston, 1842)	8	1	1	1	1	1	1	0	2					134275	exact	Suberites carnosus	(Johnston, 1842)	TRUE	TRUE	Pseudosuberites sulphureus	134260
Species		Suberites domuncula		Suberites domuncula									Suberites domuncula		134282	(Olivi, 1792)		160	Animalia	Porifera	Demospongiae	Suberitida	Suberitidae	Suberites		domuncula	(Olivi, 1792)	8	1	1	1	1	1	1	0	2					134282	exact	Suberites domuncula	(Olivi, 1792)	TRUE	TRUE	Raspaciona	131887
Species		Suberites ficus		Suberites ficus									Suberites ficus		134285	(Johnston, 1842)		161	Animalia	Porifera	Demospongiae	Suberitida	Suberitidae	Suberites		ficus	(Johnston, 1842)	8	1	1	1	1	1	1	0	2					134285	exact	Suberites ficus	(Johnston, 1842)	TRUE	TRUE	Raspaciona aculeata	133139
Species		Suberites massa		Suberites massa									Suberites massa		134296	Nardo, 1847		162	Animalia	Porifera	Demospongiae	Suberitida	Suberitidae	Suberites		massa	Nardo, 1847	8	1	1	1	1	1	1	0	2					134296	exact	Suberites massa	Nardo, 1847	TRUE	TRUE	Raspailia	131888
Species		Suberites syringella		Suberites syringella									Suberites syringella		134304	(Schmidt, 1868)		163	Animalia	Porifera	Demospongiae	Suberitida	Suberitidae	Suberites		syringella	(Schmidt, 1868)	8	1	1	1	1	1	1	0	2					134304	exact	Suberites syringella	(Schmidt, 1868)	TRUE	TRUE	Raspailia	131888
Genus		Terpios		Terpios							Terpios				132073	Duchassaing & Michelotti, 1864			Animalia	Porifera	Demospongiae	Suberitida	Suberitidae	Terpios				6	1	1	1	1	1	1	0	0					132073	exact	Terpios	Duchassaing & Michelotti, 1864	TRUE		Raspailia (Raspailia) viminalis	133154
Species		Terpios gelatinosa		Terpios gelatinosa									Terpios gelatinosa		170892	(Bowerbank, 1866)		164	Animalia	Porifera	Demospongiae	Suberitida	Suberitidae	Terpios		gelatinosa	(Bowerbank, 1866)	8	1	1	1	1	1	1	0	2					170892	exact	Terpios gelatinosa	(Bowerbank, 1866)	TRUE	TRUE	Raspailiidae	131642
Order		Tethyida		Tethyida					Tethyida						845507	Morrow & Cárdenas, 2015			Animalia	Porifera	Demospongiae	Tethyida						4	1	1	1	1	0	0	0	0					845507	exact	Tethyida	Morrow & Cárdenas, 2015	TRUE		Rhizaxinella	132071
Family		Hemiasterellidae		Hemiasterellidae						Hemiasterellidae					131670	Lendenfeld, 1889			Animalia	Porifera	Demospongiae	Tethyida	Hemiasterellidae					5	1	1	1	1	1	0	0	0					131670	exact	Hemiasterellidae	Lendenfeld, 1889	TRUE		Rhizaxinella pyrifera	134266
Genus		Hemiasterella		Hemiasterella							Hemiasterella				132035	Carter, 1879			Animalia	Porifera	Demospongiae	Tethyida	Hemiasterellidae	Hemiasterella				6	1	1	1	1	1	1	0	0					132035	exact	Hemiasterella	Carter, 1879	TRUE		Rhizaxinella shikmonae	170830
Species		Hemiasterella aristoteliana		Hemiasterella aristoteliana									Hemiasterella aristoteliana		134166	Voultsiadou-Koukoura & van Soest, 1991		165	Animalia	Porifera	Demospongiae	Tethyida	Hemiasterellidae	Hemiasterella		aristoteliana	Voultsiadou-Koukoura & van Soest, 1991	8	1	1	1	1	1	1	0	2					134166	exact	Hemiasterella aristoteliana	Voultsiadou-Koukoura & van Soest, 1991	TRUE	TRUE	Rossellidae	131694
Family		Tethyidae		Tethyidae						Tethyidae					131677	Gray, 1848			Animalia	Porifera	Demospongiae	Tethyida	Tethyidae					5	1	1	1	1	1	0	0	0					131677	exact	Tethyidae	Gray, 1848	TRUE		Samidae	171269
Genus		Tethya		Tethya							Tethya				132077	Lamarck, 1815			Animalia	Porifera	Demospongiae	Tethyida	Tethyidae	Tethya				6	1	1	1	1	1	1	0	0					132077	exact	Tethya	Lamarck, 1815	TRUE		Samus	132094
Species		Tethya aurantium		Tethya aurantium									Tethya aurantium		134311	(Pallas, 1766)		166	Animalia	Porifera	Demospongiae	Tethyida	Tethyidae	Tethya		aurantium	(Pallas, 1766)	8	1	1	1	1	1	1	0	2					134311	exact	Tethya aurantium	(Pallas, 1766)	TRUE	TRUE	Samus anonymus	171271
Species		Tethya citrina		Tethya citrina									Tethya citrina		134312	Sarà & Melone, 1965		167	Animalia	Porifera	Demospongiae	Tethyida	Tethyidae	Tethya		citrina	Sarà & Melone, 1965	8	1	1	1	1	1	1	0	2					134312	exact	Tethya citrina	Sarà & Melone, 1965	TRUE	TRUE	Sarcotragus	131753
Family		Timeidae		Timeidae						Timeidae					131678	Topsent, 1928			Animalia	Porifera	Demospongiae	Tethyida	Timeidae					5	1	1	1	1	1	0	0	0					131678	exact	Timeidae	Topsent, 1928	TRUE		Sarcotragus foetidus	132371
Genus		Timea		Timea							Timea				132079	Gray, 1867			Animalia	Porifera	Demospongiae	Tethyida	Timeidae	Timea				6	1	1	1	1	1	1	0	0					132079	exact	Timea	Gray, 1867	TRUE		Sarcotragus pipetta	165085
Species		Timea chondrilloides		Timea chondrilloides									Timea chondrilloides		134321	(Topsent, 1904)		168	Animalia	Porifera	Demospongiae	Tethyida	Timeidae	Timea		chondrilloides	(Topsent, 1904)	8	1	1	1	1	1	1	0	2					134321	exact	Timea chondrilloides	(Topsent, 1904)	TRUE	TRUE	Sarcotragus spinosulus	165086
Species		Timea geministellata		Timea geministellata									Timea geministellata		134325	Pulitzer-Finali, 1978		169	Animalia	Porifera	Demospongiae	Tethyida	Timeidae	Timea		geministellata	Pulitzer-Finali, 1978	8	1	1	1	1	1	1	0	2					134325	exact	Timea geministellata	Pulitzer-Finali, 1978	TRUE	TRUE	Scalarispongia	165370
Species		Timea stellata		Timea stellata									Timea stellata		134330	(Bowerbank, 1866)		170	Animalia	Porifera	Demospongiae	Tethyida	Timeidae	Timea		stellata	(Bowerbank, 1866)	8	1	1	1	1	1	1	0	2					134330	exact	Timea stellata	(Bowerbank, 1866)	TRUE	TRUE	Scalarispongia scalaris	165376
Species		Timea stellifasciata		Timea stellifasciata									Timea stellifasciata		134331	Sarà & Siribelli, 1960		171	Animalia	Porifera	Demospongiae	Tethyida	Timeidae	Timea		stellifasciata	Sarà & Siribelli, 1960	8	1	1	1	1	1	1	0	2					134331	exact	Timea stellifasciata	Sarà & Siribelli, 1960	TRUE	TRUE	Scopalina	131797
Species		Timea unistellata		Timea unistellata									Timea unistellata		134335	(Topsent, 1892)		172	Animalia	Porifera	Demospongiae	Tethyida	Timeidae	Timea		unistellata	(Topsent, 1892)	8	1	1	1	1	1	1	0	2					134335	exact	Timea unistellata	(Topsent, 1892)	TRUE	TRUE	Scopalina lophyropoda	132557
Order		Tetractinellida		Tetractinellida					Tetractinellida						597812	Marshall, 1876			Animalia	Porifera	Demospongiae	Tetractinellida						4	1	1	1	1	0	0	0	0					597812	exact	Tetractinellida	Marshall, 1876	TRUE		Scopalinida	845472
Family		Ancorinidae		Ancorinidae						Ancorinidae					131662	Schmidt, 1870			Animalia	Porifera	Demospongiae	Tetractinellida	Ancorinidae					5	1	1	1	1	1	0	0	0					131662	exact	Ancorinidae	Schmidt, 1870	TRUE		Scopalinidae	598620
Genus		Dercitus		Dercitus							Dercitus				132013	Gray, 1867			Animalia	Porifera	Demospongiae	Tetractinellida	Ancorinidae	Dercitus				6	1	1	1	1	1	1	0	0					132013	exact	Dercitus	Gray, 1867	TRUE		Siphonochalina	131827
Subgenus		Stoeba		Stoeba											132013	Gray, 1867			Animalia	Porifera	Demospongiae	Tetractinellida	Ancorinidae	Dercitus	Stoeba			7	1	1	1	1	1	1	1	0					132013	exact	Dercitus	Gray, 1867	FALSE		Siphonochalina expansa	132747
Species		Dercitus plicatus		Dercitus plicatus									Dercitus (Stoeba) plicatus		555693	(Schmidt, 1868)		173	Animalia	Porifera	Demospongiae	Tetractinellida	Ancorinidae	Dercitus		plicatus	(Schmidt, 1868)	8	1	1	1	1	1	1	0	2					555693	exact	Dercitus (Stoeba) plicatus	(Schmidt, 1868)	FALSE	TRUE	Spirastrella	132060
Genus		Jaspis		Jaspis							Jaspis				131999	Gray, 1867			Animalia	Porifera	Demospongiae	Tetractinellida	Ancorinidae	Jaspis				6	1	1	1	1	1	1	0	0					131999	exact	Jaspis	Gray, 1867	TRUE		Spirastrella cunctatrix	134235
Species		Jaspis johnstonii		Jaspis johnstonii									Jaspis johnstonii		134000	(Schmidt, 1862)		174	Animalia	Porifera	Demospongiae	Tetractinellida	Ancorinidae	Jaspis		johnstonii	(Schmidt, 1862)	8	1	1	1	1	1	1	0	2					134000	exact	Jaspis johnstonii	(Schmidt, 1862)	TRUE	TRUE	Spirastrellidae	131674
Genus		Stelletta		Stelletta							Stelletta				131994	Schmidt, 1862			Animalia	Porifera	Demospongiae	Tetractinellida	Ancorinidae	Stelletta				6	1	1	1	1	1	1	0	0					131994	exact	Stelletta	Schmidt, 1862	TRUE		Spiroxya	132061
Species		Stelletta dorsigera		Stelletta dorsigera									Stelletta dorsigera		133972	Schmidt, 1864		175	Animalia	Porifera	Demospongiae	Tetractinellida	Ancorinidae	Stelletta		dorsigera	Schmidt, 1864	8	1	1	1	1	1	1	0	2					133972	exact	Stelletta dorsigera	Schmidt, 1864	TRUE	TRUE	Spiroxya heteroclita	134238
Species		Stelletta grubii		Stelletta grubii									Stelletta grubii		133974	Schmidt, 1862		176	Animalia	Porifera	Demospongiae	Tetractinellida	Ancorinidae	Stelletta		grubii	Schmidt, 1862	8	1	1	1	1	1	1	0	2					133974	exact	Stelletta grubii	Schmidt, 1862	TRUE	TRUE	Spongia	131759
Species		Stelletta hispida		Stelletta hispida									Stelletta hispida		133976	(Buccich, 1886)		177	Animalia	Porifera	Demospongiae	Tetractinellida	Ancorinidae	Stelletta		hispida	(Buccich, 1886)	8	1	1	1	1	1	1	0	2					133976	exact	Stelletta hispida	(Buccich, 1886)	TRUE	TRUE	Spongia	131759
Species		Stelletta mediterranea		Stelletta mediterranea									Stelletta mediterranea		133978	(Topsent, 1893)		178	Animalia	Porifera	Demospongiae	Tetractinellida	Ancorinidae	Stelletta		mediterranea	(Topsent, 1893)	8	1	1	1	1	1	1	0	2					133978	exact	Stelletta mediterranea	(Topsent, 1893)	TRUE	TRUE	Spongia (Spongia) lamella	266969
Species		Stelletta stellata		Stelletta stellata									Stelletta stellata		133985	Topsent, 1893		179	Animalia	Porifera	Demospongiae	Tetractinellida	Ancorinidae	Stelletta		stellata	Topsent, 1893	8	1	1	1	1	1	1	0	2					133985	exact	Stelletta stellata	Topsent, 1893	TRUE	TRUE	Spongia (Spongia) nitens	165216
Genus		Stryphnus		Stryphnus							Stryphnus				131995	Sollas, 1886			Animalia	Porifera	Demospongiae	Tetractinellida	Ancorinidae	Stryphnus				6	1	1	1	1	1	1	0	0					131995	exact	Stryphnus	Sollas, 1886	TRUE		Spongia (Spongia) officinalis	165220
Subgenus		Stryphnus		Stryphnus											131995	Sollas, 1886			Animalia	Porifera	Demospongiae	Tetractinellida	Ancorinidae	Stryphnus	Stryphnus			7	1	1	1	1	1	1	1	0					131995	exact	Stryphnus	Sollas, 1886	TRUE		Spongia (Spongia) virgultosa	165250
Species		Stryphnus mucronatus		Stryphnus mucronatus									Stryphnus (Stryphnus) mucronatus		133989	(Schmidt, 1868)		180	Animalia	Porifera	Demospongiae	Tetractinellida	Ancorinidae	Stryphnus		mucronatus	(Schmidt, 1868)	8	1	1	1	1	1	1	0	2					133989	exact_subgenus	Stryphnus mucronatus	(Schmidt, 1868)	TRUE	TRUE	Spongia (Spongia) zimocca	165251
Species		Stryphnus ponderosus		Stryphnus ponderosus									Stryphnus (Stryphnus) ponderosus		133991	(Bowerbank, 1866)		181	Animalia	Porifera	Demospongiae	Tetractinellida	Ancorinidae	Stryphnus		ponderosus	(Bowerbank, 1866)	8	1	1	1	1	1	1	0	2					133991	exact_subgenus	Stryphnus ponderosus	(Bowerbank, 1866)	TRUE	TRUE	Spongiidae	131626
Family		Azoricidae		Azoricidae						Azoricidae					171053	Sollas, 1888			Animalia	Porifera	Demospongiae	Tetractinellida	Azoricidae					5	1	1	1	1	1	0	0	0					171053	exact	Azoricidae	Sollas, 1888	TRUE		Spongillida	845456
Genus		Leiodermatium		Leiodermatium							Leiodermatium				132086	Schmidt, 1870			Animalia	Porifera	Demospongiae	Tetractinellida	Azoricidae	Leiodermatium				6	1	1	1	1	1	1	0	0					132086	exact	Leiodermatium	Schmidt, 1870	TRUE		Spongillidae	167108
Subgenus		Leiodermatium		Leiodermatium											132086	Schmidt, 1870			Animalia	Porifera	Demospongiae	Tetractinellida	Azoricidae	Leiodermatium	Leiodermatium			7	1	1	1	1	1	1	1	0					132086	exact	Leiodermatium	Schmidt, 1870	TRUE		Spongionella	131748
Species		Leiodermatium lynceus		Leiodermatium lynceus									Leiodermatium (Leiodermatium) lynceus		134344	Schmidt, 1870		182	Animalia	Porifera	Demospongiae	Tetractinellida	Azoricidae	Leiodermatium		lynceus	Schmidt, 1870	8	1	1	1	1	1	1	0	2					134344	exact_subgenus	Leiodermatium lynceus	Schmidt, 1870	TRUE	TRUE	Spongionella pulchella	132335
Family		Calthropellidae		Calthropellidae						Calthropellidae					170035	Lendenfeld, 1907			Animalia	Porifera	Demospongiae	Tetractinellida	Calthropellidae					5	1	1	1	1	1	0	0	0					170035	exact	Calthropellidae	Lendenfeld, 1907	TRUE		Spongosorites	131818
Genus		Calthropella		Calthropella							Calthropella				131987	Sollas, 1888			Animalia	Porifera	Demospongiae	Tetractinellida	Calthropellidae	Calthropella				6	1	1	1	1	1	1	0	0					131987	exact	Calthropella	Sollas, 1888	TRUE		Spongosorites flavens	132719
Subgenus		Calthropella		Calthropella											131987	Sollas, 1888			Animalia	Porifera	Demospongiae	Tetractinellida	Calthropellidae	Calthropella	Calthropella			7	1	1	1	1	1	1	1	0					131987	exact	Calthropella	Sollas, 1888	TRUE		Spongosorites intricatus	132721
Species		Calthropella pathologica		Calthropella pathologica									Calthropella (Calthropella) pathologica		555800	(Schmidt, 1868)		183	Animalia	Porifera	Demospongiae	Tetractinellida	Calthropellidae	Calthropella		pathologica	(Schmidt, 1868)	8	1	1	1	1	1	1	0	2					555800	exact	Calthropella (Calthropella) pathologica	(Schmidt, 1868)	FALSE	TRUE	Stelletta	131994
Subgenus		Corticellopsis		Corticellopsis											131987	Sollas, 1888			Animalia	Porifera	Demospongiae	Tetractinellida	Calthropellidae	Calthropella	Corticellopsis			7	1	1	1	1	1	1	1	0					131987	exact	Calthropella	Sollas, 1888	FALSE		Stelletta dorsigera	133972
Species		Calthropella stelligera		Calthropella stelligera									Calthropella (Corticellopsis) stelligera		555820	(Schmidt, 1868)		184	Animalia	Porifera	Demospongiae	Tetractinellida	Calthropellidae	Calthropella		stelligera	(Schmidt, 1868)	8	1	1	1	1	1	1	0	2					555820	exact	Calthropella (Corticellopsis) stelligera	(Schmidt, 1868)	FALSE	TRUE	Stelletta grubii	133974
Family		Geodiidae		Geodiidae						Geodiidae					131664	Gray, 1867			Animalia	Porifera	Demospongiae	Tetractinellida	Geodiidae					5	1	1	1	1	1	0	0	0					131664	exact	Geodiidae	Gray, 1867	TRUE		Stelletta hispida	133976
Genus		Erylus		Erylus							Erylus				132004	Gray, 1867			Animalia	Porifera	Demospongiae	Tetractinellida	Geodiidae	Erylus				6	1	1	1	1	1	1	0	0					132004	exact	Erylus	Gray, 1867	TRUE		Stelletta mediterranea	133978
Species		Erylus discophorus		Erylus discophorus									Erylus discophorus		134011	(Schmidt, 1862)		185	Animalia	Porifera	Demospongiae	Tetractinellida	Geodiidae	Erylus		discophorus	(Schmidt, 1862)	8	1	1	1	1	1	1	0	2					134011	exact	Erylus discophorus	(Schmidt, 1862)	TRUE	TRUE	Stelletta stellata	133985
Genus		Geodia		Geodia							Geodia				132005	Lamarck, 1815			Animalia	Porifera	Demospongiae	Tetractinellida	Geodiidae	Geodia				6	1	1	1	1	1	1	0	0					132005	exact	Geodia	Lamarck, 1815	TRUE		Stelligera	132037
Species		Geodia conchilega		Geodia conchilega									Geodia conchilega		134024	Schmidt, 1862		186	Animalia	Porifera	Demospongiae	Tetractinellida	Geodiidae	Geodia		conchilega	Schmidt, 1862	8	1	1	1	1	1	1	0	2					134024	exact	Geodia conchilega	Schmidt, 1862	TRUE	TRUE	Stelligera stuposa	134175
Species		Geodia cydonium		Geodia cydonium									Geodia cydonium		134025	(Jameson, 1811)		187	Animalia	Porifera	Demospongiae	Tetractinellida	Geodiidae	Geodia		cydonium	(Jameson, 1811)	8	1	1	1	1	1	1	0	2					134025	exact	Geodia cydonium	(Jameson, 1811)	TRUE	TRUE	Stelligeridae	607948
Genus		Penares		Penares							Penares				131992	Gray, 1867			Animalia	Porifera	Demospongiae	Tetractinellida	Geodiidae	Penares				6	1	1	1	1	1	1	0	0					131992	exact	Penares	Gray, 1867	TRUE		Stryphnus	131995
Species		Penares euastrum		Penares euastrum									Penares euastrum		597207	(Schmidt, 1868)		188	Animalia	Porifera	Demospongiae	Tetractinellida	Geodiidae	Penares		euastrum	(Schmidt, 1868)	8	1	1	1	1	1	1	0	2					597207	exact	Penares euastrum	(Schmidt, 1868)	TRUE	TRUE	Stryphnus	131995
Species		Penares helleri		Penares helleri									Penares helleri		133961	(Schmidt, 1864)		189	Animalia	Porifera	Demospongiae	Tetractinellida	Geodiidae	Penares		helleri	(Schmidt, 1864)	8	1	1	1	1	1	1	0	2					133961	exact	Penares helleri	(Schmidt, 1864)	TRUE	TRUE	Stryphnus mucronatus	133989
Family		Pachastrellidae		Pachastrellidae						Pachastrellidae					131665	Carter, 1875			Animalia	Porifera	Demospongiae	Tetractinellida	Pachastrellidae					5	1	1	1	1	1	0	0	0					131665	exact	Pachastrellidae	Carter, 1875	TRUE		Stryphnus ponderosus	133991
Genus		Pachastrella		Pachastrella							Pachastrella				132015	Schmidt, 1868			Animalia	Porifera	Demospongiae	Tetractinellida	Pachastrellidae	Pachastrella				6	1	1	1	1	1	1	0	0					132015	exact	Pachastrella	Schmidt, 1868	TRUE		Stylocordyla	132063
Species		Pachastrella monilifera		Pachastrella monilifera									Pachastrella monilifera		134078	Schmidt, 1868		190	Animalia	Porifera	Demospongiae	Tetractinellida	Pachastrellidae	Pachastrella		monilifera	Schmidt, 1868	8	1	1	1	1	1	1	0	2					134078	exact	Pachastrella monilifera	Schmidt, 1868	TRUE	TRUE	Stylocordyla pellita	185002
Family		Samidae		Samidae						Samidae					171269	Sollas, 1888			Animalia	Porifera	Demospongiae	Tetractinellida	Samidae					5	1	1	1	1	1	0	0	0					171269	exact	Samidae	Sollas, 1888	TRUE		Stylocordylidae	131675
Genus		Samus		Samus							Samus				132094	Gray, 1867			Animalia	Porifera	Demospongiae	Tetractinellida	Samidae	Samus				6	1	1	1	1	1	1	0	0					132094	exact	Samus	Gray, 1867	TRUE		Suberites	132072
Species		Samus anonymus		Samus anonymus									Samus anonymus		171271	Gray, 1867		191	Animalia	Porifera	Demospongiae	Tetractinellida	Samidae	Samus		anonymus	Gray, 1867	8	1	1	1	1	1	1	0	2					171271	exact	Samus anonymus	Gray, 1867	TRUE	TRUE	Suberites carnosus	134275
Family		Tetillidae		Tetillidae						Tetillidae					131683	Sollas, 1886			Animalia	Porifera	Demospongiae	Tetractinellida	Tetillidae					5	1	1	1	1	1	0	0	0					131683	exact	Tetillidae	Sollas, 1886	TRUE		Suberites domuncula	134282
Genus		Craniella		Craniella							Craniella				132093	Schmidt, 1870			Animalia	Porifera	Demospongiae	Tetractinellida	Tetillidae	Craniella				6	1	1	1	1	1	1	0	0					132093	exact	Craniella	Schmidt, 1870	TRUE		Suberites ficus	134285
Species		Craniella cranium		Craniella cranium									Craniella cranium		171330	(Müller, 1776)		192	Animalia	Porifera	Demospongiae	Tetractinellida	Tetillidae	Craniella		cranium	(Müller, 1776)	8	1	1	1	1	1	1	0	2					171330	exact	Craniella cranium	(Müller, 1776)	TRUE	TRUE	Suberites massa	134296
Family		Theneidae		Theneidae						Theneidae					131666	Carter, 1883			Animalia	Porifera	Demospongiae	Tetractinellida	Theneidae					5	1	1	1	1	1	0	0	0					131666	exact	Theneidae	Carter, 1883	TRUE		Suberites syringella	134304
Genus		Thenea		Thenea							Thenea				132019	Gray, 1867			Animalia	Porifera	Demospongiae	Tetractinellida	Theneidae	Thenea				6	1	1	1	1	1	1	0	0					132019	exact	Thenea	Gray, 1867	TRUE		Suberitida	845509
Species		Thenea muricata		Thenea muricata									Thenea muricata		134106	(Bowerbank, 1858)		193	Animalia	Porifera	Demospongiae	Tetractinellida	Theneidae	Thenea		muricata	(Bowerbank, 1858)	8	1	1	1	1	1	1	0	2					134106	exact	Thenea muricata	(Bowerbank, 1858)	TRUE	TRUE	Suberitidae	131676
Family		Theonellidae		Theonellidae						Theonellidae					131682	Lendenfeld, 1903			Animalia	Porifera	Demospongiae	Tetractinellida	Theonellidae					5	1	1	1	1	1	0	0	0					131682	exact	Theonellidae	Lendenfeld, 1903	TRUE		Sycettidae	131617
Genus		Discodermia		Discodermia							Discodermia				132089	du Bocage, 1869			Animalia	Porifera	Demospongiae	Tetractinellida	Theonellidae	Discodermia				6	1	1	1	1	1	1	0	0					132089	exact	Discodermia	du Bocage, 1869	TRUE		Sycon	131723
Species		Discodermia polymorpha		Discodermia polymorpha									Discodermia polymorpha		558214	Pisera & Vacelet, 2011		194	Animalia	Porifera	Demospongiae	Tetractinellida	Theonellidae	Discodermia		polymorpha	Pisera & Vacelet, 2011	8	1	1	1	1	1	1	0	2					558214	exact	Discodermia polymorpha	Pisera & Vacelet, 2011	TRUE	TRUE	Sycon elegans	132252
Family		Thoosidae		Thoosidae						Thoosidae					567951	Cockerell, 1925			Animalia	Porifera	Demospongiae	Tetractinellida	Thoosidae					5	1	1	1	1	1	0	0	0					567951	exact	Thoosidae	Cockerell, 1925	TRUE		Sycon faulkneri	164577
Genus		Alectona		Alectona							Alectona				132025	Carter, 1879			Animalia	Porifera	Demospongiae	Tetractinellida	Thoosidae	Alectona				6	1	1	1	1	1	1	0	0					132025	exact	Alectona	Carter, 1879	TRUE		Sycon raphanus	132257
Species		Alectona millari		Alectona millari									Alectona millari		134115	Carter, 1879		195	Animalia	Porifera	Demospongiae	Tetractinellida	Thoosidae	Alectona		millari	Carter, 1879	8	1	1	1	1	1	1	0	2					134115	exact	Alectona millari	Carter, 1879	TRUE	TRUE	Sympagella	132113
Family		Vulcanellidae		Vulcanellidae						Vulcanellidae					597265	Cárdenas, Xavier, Reveillaud, Schander & Rapp, 2011			Animalia	Porifera	Demospongiae	Tetractinellida	Vulcanellidae					5	1	1	1	1	1	0	0	0					597265	exact	Vulcanellidae	Cárdenas, Xavier, Reveillaud, Schander & Rapp, 2011	TRUE		Sympagella nux	134399
Genus		Poecillastra		Poecillastra							Poecillastra				132016	Sollas, 1888			Animalia	Porifera	Demospongiae	Tetractinellida	Vulcanellidae	Poecillastra				6	1	1	1	1	1	1	0	0					132016	exact	Poecillastra	Sollas, 1888	TRUE		Tedania	131974
Species		Poecillastra compressa		Poecillastra compressa									Poecillastra compressa		134083	(Bowerbank, 1866)		196	Animalia	Porifera	Demospongiae	Tetractinellida	Vulcanellidae	Poecillastra		compressa	(Bowerbank, 1866)	8	1	1	1	1	1	1	0	2					134083	exact	Poecillastra compressa	(Bowerbank, 1866)	TRUE	TRUE	Tedania	131974
Genus		Vulcanella		Vulcanella							Vulcanella				170325	Sollas, 1886			Animalia	Porifera	Demospongiae	Tetractinellida	Vulcanellidae	Vulcanella				6	1	1	1	1	1	1	0	0					170325	exact	Vulcanella	Sollas, 1886	TRUE		Tedania (Tedania) anhelans	169546
Species		Vulcanella gracilis		Vulcanella gracilis									Vulcanella gracilis		597279	(Sollas, 1888)		197	Animalia	Porifera	Demospongiae	Tetractinellida	Vulcanellidae	Vulcanella		gracilis	(Sollas, 1888)	8	1	1	1	1	1	1	0	2					597279	exact	Vulcanella gracilis	(Sollas, 1888)	TRUE	TRUE	Tedaniidae	131659
Order		Verongiida		Verongiida					Verongiida						845402	Bergquist, 1978			Animalia	Porifera	Demospongiae	Verongiida						4	1	1	1	1	0	0	0	0					845402	exact	Verongiida	Bergquist, 1978	TRUE		Tentorium	132053
Family		Aplysinidae		Aplysinidae						Aplysinidae					131660	Carter, 1875			Animalia	Porifera	Demospongiae	Verongiida	Aplysinidae					5	1	1	1	1	1	0	0	0					131660	exact	Aplysinidae	Carter, 1875	TRUE		Tentorium levantinum	170688
Genus		Aplysina		Aplysina							Aplysina				131975	Nardo, 1834			Animalia	Porifera	Demospongiae	Verongiida	Aplysinidae	Aplysina				6	1	1	1	1	1	1	0	0					131975	exact	Aplysina	Nardo, 1834	TRUE		Terpios	132073
Species		Aplysina aerophoba		Aplysina aerophoba									Aplysina aerophoba		133911	(Nardo, 1833)		198	Animalia	Porifera	Demospongiae	Verongiida	Aplysinidae	Aplysina		aerophoba	(Nardo, 1833)	8	1	1	1	1	1	1	0	2					133911	exact	Aplysina aerophoba	(Nardo, 1833)	TRUE	TRUE	Terpios gelatinosa	170892
Species		Aplysina cavernicola		Aplysina cavernicola									Aplysina cavernicola		133913	(Vacelet, 1959)		199	Animalia	Porifera	Demospongiae	Verongiida	Aplysinidae	Aplysina		cavernicola	(Vacelet, 1959)	8	1	1	1	1	1	1	0	2					133913	exact	Aplysina cavernicola	(Vacelet, 1959)	TRUE	TRUE	Tethya	132077
Family		Ianthellidae		Ianthellidae						Ianthellidae					169676	Hyatt, 1875			Animalia	Porifera	Demospongiae	Verongiida	Ianthellidae					5	1	1	1	1	1	0	0	0					169676	exact	Ianthellidae	Hyatt, 1875	TRUE		Tethya aurantium	134311
Genus		Hexadella		Hexadella							Hexadella				131742	Topsent, 1896			Animalia	Porifera	Demospongiae	Verongiida	Ianthellidae	Hexadella				6	1	1	1	1	1	1	0	0					131742	exact	Hexadella	Topsent, 1896	TRUE		Tethya citrina	134312
Species		Hexadella pruvoti		Hexadella pruvoti									Hexadella pruvoti		169685	Topsent, 1896		200	Animalia	Porifera	Demospongiae	Verongiida	Ianthellidae	Hexadella		pruvoti	Topsent, 1896	8	1	1	1	1	1	1	0	2					169685	exact	Hexadella pruvoti	Topsent, 1896	TRUE	TRUE	Tethyida	845507
Species		Hexadella racovitzai		Hexadella racovitzai									Hexadella racovitzai		132315	Topsent, 1896		201	Animalia	Porifera	Demospongiae	Verongiida	Ianthellidae	Hexadella		racovitzai	Topsent, 1896	8	1	1	1	1	1	1	0	2					132315	exact	Hexadella racovitzai	Topsent, 1896	TRUE	TRUE	Tethyidae	131677
Class		Hexactinellida		Hexactinellida				Hexactinellida							22612	Schmidt, 1870			Animalia	Porifera	Hexactinellida							3	1	1	1	0	0	0	0	0					22612	exact	Hexactinellida	Schmidt, 1870	TRUE		Tetillidae	131683
Order		Lyssacinosida		Lyssacinosida					Lyssacinosida						171834	Zittel, 1877			Animalia	Porifera	Hexactinellida	Lyssacinosida						4	1	1	1	1	0	0	0	0					171834	exact	Lyssacinosida	Zittel, 1877	TRUE		Tetractinellida	597812
Family		Rossellidae		Rossellidae						Rossellidae					131694	Schulze, 1885			Animalia	Porifera	Hexactinellida	Lyssacinosida	Rossellidae					5	1	1	1	1	1	0	0	0					131694	exact	Rossellidae	Schulze, 1885	TRUE		Thenea	132019
Genus		Sympagella		Sympagella							Sympagella				132113	Schmidt, 1870			Animalia	Porifera	Hexactinellida	Lyssacinosida	Rossellidae	Sympagella				6	1	1	1	1	1	1	0	0					132113	exact	Sympagella	Schmidt, 1870	TRUE		Thenea muricata	134106
Species		Sympagella nux		Sympagella nux									Sympagella nux		134399	Schmidt, 1870		202	Animalia	Porifera	Hexactinellida	Lyssacinosida	Rossellidae	Sympagella		nux	Schmidt, 1870	8	1	1	1	1	1	1	0	2					134399	exact	Sympagella nux	Schmidt, 1870	TRUE	TRUE	Theneidae	131666
Class		Homoscleromorpha		Homoscleromorpha				Homoscleromorpha							131587	Bergquist, 1978			Animalia	Porifera	Homoscleromorpha							3	1	1	1	0	0	0	0	0					131587	exact	Homoscleromorpha	Bergquist, 1978	TRUE		Theonellidae	131682
Order		Homosclerophorida		Homosclerophorida					Homosclerophorida						131601	Dendy, 1905			Animalia	Porifera	Homoscleromorpha	Homosclerophorida						4	1	1	1	1	0	0	0	0					131601	exact	Homosclerophorida	Dendy, 1905	TRUE		Thoosidae	567951
Family		Oscarellidae		Oscarellidae						Oscarellidae					150263	Lendenfeld, 1887			Animalia	Porifera	Homoscleromorpha	Homosclerophorida	Oscarellidae					5	1	1	1	1	1	0	0	0					150263	exact	Oscarellidae	Lendenfeld, 1887	TRUE		Thorectidae	131627
Genus		Oscarella		Oscarella							Oscarella				131979	Vosmaer, 1884			Animalia	Porifera	Homoscleromorpha	Homosclerophorida	Oscarellidae	Oscarella				6	1	1	1	1	1	1	0	0					131979	exact	Oscarella	Vosmaer, 1884	TRUE		Thymosiopsis	132024
Species		Oscarella balibaloi		Oscarella balibaloi									Oscarella balibaloi		564911	Pérez, Ivanisevic, Dubois, Pedel, Thomas, Tokina & Ereskovsky, 2011		203	Animalia	Porifera	Homoscleromorpha	Homosclerophorida	Oscarellidae	Oscarella		balibaloi	Pérez, Ivanisevic, Dubois, Pedel, Thomas, Tokina & Ereskovsky, 2011	8	1	1	1	1	1	1	0	2					564911	exact	Oscarella balibaloi	Pérez, Ivanisevic, Dubois, Pedel, Thomas, Tokina & Ereskovsky, 2011	TRUE	TRUE	Thymosiopsis cuticulatus	134114
Species		Oscarella lobularis		Oscarella lobularis									Oscarella lobularis		133928	(Schmidt, 1862)		204	Animalia	Porifera	Homoscleromorpha	Homosclerophorida	Oscarellidae	Oscarella		lobularis	(Schmidt, 1862)	8	1	1	1	1	1	1	0	2					133928	exact	Oscarella lobularis	(Schmidt, 1862)	TRUE	TRUE	Timea	132079
Species		Oscarella microlobata		Oscarella microlobata									Oscarella microlobata		169719	Muricy, Boury-Esnault, Bézac & Vacelet, 1996		205	Animalia	Porifera	Homoscleromorpha	Homosclerophorida	Oscarellidae	Oscarella		microlobata	Muricy, Boury-Esnault, Bézac & Vacelet, 1996	8	1	1	1	1	1	1	0	2					169719	exact	Oscarella microlobata	Muricy, Boury-Esnault, Bézac & Vacelet, 1996	TRUE	TRUE	Timea chondrilloides	134321
Species		Oscarella tuberculata		Oscarella tuberculata									Oscarella tuberculata		169724	(Schmidt, 1868)		206	Animalia	Porifera	Homoscleromorpha	Homosclerophorida	Oscarellidae	Oscarella		tuberculata	(Schmidt, 1868)	8	1	1	1	1	1	1	0	2					169724	exact	Oscarella tuberculata	(Schmidt, 1868)	TRUE	TRUE	Timea geministellata	134325
Genus		Pseudocorticium		Pseudocorticium							Pseudocorticium				131984	Boury-Esnault, Muricy, Gallissian & Vacelet, 1995			Animalia	Porifera	Homoscleromorpha	Homosclerophorida	Oscarellidae	Pseudocorticium				6	1	1	1	1	1	1	0	0					131984	exact	Pseudocorticium	Boury-Esnault, Muricy, Gallissian & Vacelet, 1995	TRUE		Timea stellata	134330
Species		Pseudocorticium jarrei		Pseudocorticium jarrei									Pseudocorticium jarrei		133939	Boury-Esnault, Muricy, Gallissian & Vacelet, 1995		207	Animalia	Porifera	Homoscleromorpha	Homosclerophorida	Oscarellidae	Pseudocorticium		jarrei	Boury-Esnault, Muricy, Gallissian & Vacelet, 1995	8	1	1	1	1	1	1	0	2					133939	exact	Pseudocorticium jarrei	Boury-Esnault, Muricy, Gallissian & Vacelet, 1995	TRUE	TRUE	Timea stellifasciata	134331
Family		Plakinidae		Plakinidae						Plakinidae					131661	Schulze, 1880			Animalia	Porifera	Homoscleromorpha	Homosclerophorida	Plakinidae					5	1	1	1	1	1	0	0	0					131661	exact	Plakinidae	Schulze, 1880	TRUE		Timea unistellata	134335
Genus		Corticium		Corticium							Corticium				131976	Schmidt, 1862			Animalia	Porifera	Homoscleromorpha	Homosclerophorida	Plakinidae	Corticium				6	1	1	1	1	1	1	0	0					131976	exact	Corticium	Schmidt, 1862	TRUE		Timeidae	131678
Species		Corticium candelabrum		Corticium candelabrum									Corticium candelabrum		133921	Schmidt, 1862		208	Animalia	Porifera	Homoscleromorpha	Homosclerophorida	Plakinidae	Corticium		candelabrum	Schmidt, 1862	8	1	1	1	1	1	1	0	2					133921	exact	Corticium candelabrum	Schmidt, 1862	TRUE	TRUE	Topsentia	131821
Genus		Plakina		Plakina							Plakina				131981	Schulze, 1880			Animalia	Porifera	Homoscleromorpha	Homosclerophorida	Plakinidae	Plakina				6	1	1	1	1	1	1	0	0					131981	exact	Plakina	Schulze, 1880	TRUE		Topsentia vaceleti	605315
Species		Plakina bowerbanki		Plakina bowerbanki									Plakina bowerbanki		169733	(Sarà, 1960)		209	Animalia	Porifera	Homoscleromorpha	Homosclerophorida	Plakinidae	Plakina		bowerbanki	(Sarà, 1960)	8	1	1	1	1	1	1	0	2					169733	exact	Plakina bowerbanki	(Sarà, 1960)	TRUE	TRUE	Ulosa	131912
Species		Plakina dilopha		Plakina dilopha									Plakina dilopha		133931	Schulze, 1880		210	Animalia	Porifera	Homoscleromorpha	Homosclerophorida	Plakinidae	Plakina		dilopha	Schulze, 1880	8	1	1	1	1	1	1	0	2					133931	exact	Plakina dilopha	Schulze, 1880	TRUE	TRUE	Ulosa stuposa	133323
Species		Plakina monolopha		Plakina monolopha									Plakina monolopha		133932	Schulze, 1880		211	Animalia	Porifera	Homoscleromorpha	Homosclerophorida	Plakinidae	Plakina		monolopha	Schulze, 1880	8	1	1	1	1	1	1	0	2					133932	exact	Plakina monolopha	Schulze, 1880	TRUE	TRUE	Ulosa tenellula	133324
Species		Plakina trilopha		Plakina trilopha									Plakina trilopha		133933	Schulze, 1880		212	Animalia	Porifera	Homoscleromorpha	Homosclerophorida	Plakinidae	Plakina		trilopha	Schulze, 1880	8	1	1	1	1	1	1	0	2					133933	exact	Plakina trilopha	Schulze, 1880	TRUE	TRUE	Verongiida	845402
Species		Plakina weinbergi		Plakina weinbergi									Plakina weinbergi		169751	Muricy, Boury-Esnault, Bézac & Vacelet, 1998		213	Animalia	Porifera	Homoscleromorpha	Homosclerophorida	Plakinidae	Plakina		weinbergi	Muricy, Boury-Esnault, Bézac & Vacelet, 1998	8	1	1	1	1	1	1	0	2					169751	exact	Plakina weinbergi	Muricy, Boury-Esnault, Bézac & Vacelet, 1998	TRUE	TRUE	Vulcanella	170325
Genus		Plakinastrella		Plakinastrella							Plakinastrella				131982	Schulze, 1880			Animalia	Porifera	Homoscleromorpha	Homosclerophorida	Plakinidae	Plakinastrella				6	1	1	1	1	1	1	0	0					131982	exact	Plakinastrella	Schulze, 1880	TRUE		Vulcanella gracilis	597279
Species		Plakinastrella copiosa		Plakinastrella copiosa									Plakinastrella copiosa		133934	Schulze, 1880		214	Animalia	Porifera	Homoscleromorpha	Homosclerophorida	Plakinidae	Plakinastrella		copiosa	Schulze, 1880	8	1	1	1	1	1	1	0	2					133934	exact	Plakinastrella copiosa	Schulze, 1880	TRUE	TRUE	Vulcanellidae	597265
Genus		Plakortis		Plakortis							Plakortis				131983	Schulze, 1880			Animalia	Porifera	Homoscleromorpha	Homosclerophorida	Plakinidae	Plakortis				6	1	1	1	1	1	1	0	0					131983	exact	Plakortis	Schulze, 1880	TRUE		Weberella	132059
Species		Plakortis simplex		Plakortis simplex									Plakortis simplex		133938	Schulze, 1880		215	Animalia	Porifera	Homoscleromorpha	Homosclerophorida	Plakinidae	Plakortis		simplex	Schulze, 1880	8	1	1	1	1	1	1	0	2					133938	exact	Plakortis simplex	Schulze, 1880	TRUE	TRUE	Weberella verrucosa	134233
[truncated: 18 more columns]
